# Supplementary material for: Human pluripotent stem cell-derived acinar/ductal organoids generate human pancreas upon orthotopic transplantation and allow disease modelling
Source: PubMed Central journal article supplement — Gut. 2016 Sep 15;66(3):473–86. doi: 10.1136/gutjnl-2016-312423 (PMC5534761; doi:10.1136/gutjnl-2016-312423), 2016-09-15
Supplement: gutjnl-2016-312423supp001.pdf [file gutjnl-2016-312423supp001.pdf]

## Supplementary File

### Table of contents:

- Material and Methods
- Supplementary Results
- Supplementary Figure Legends
- Supplementary Literature
- Supplementary Tables
- Supplementary Figures

## Materials and Methods

### Patient characteristics

We included two patients under regular follow-up in our CF outpatient clinic into this study. Both suffered from classical CF-lung phenotype but also from pancreatic insufficiency requiring exocrine enzyme substitution. One patient was post lung transplantation. CFTR genotype is depicted in **Figure 3F** and **G**. The study has been approved by the local ethics committee at Ulm University and the patients gave written consent.

c.1521\_1523delCTT (p.F508del) is the most frequent mutation in the Middle European population (70% of CF-associated alleles according to CFTR2 database (<http://www.cftr2.org/>): The in-frame deletion of phenylalanine at position 508 causes perturbed posttranslational processing and leads to misfolding and retention of the mutant protein in the ER and lack of the protein at the apical membrane (class II).

c.3773dupT (p.L1258Ffs\*7), former nomenclature 3905insT (legacy name), is a rare mutation (less than 0.5% of CF-associated alleles but more frequent in the Swiss population (almost 10% of CF-associated alleles) <sup>1</sup>. The mutation leads to frameshift and a premature translational stop codon. The mutant mRNA has been shown to escape nonsense-mediated decay, but absence of expression of the mutant protein could be demonstrated at the apical membrane (class I or II) <sup>1</sup>.

c.3276C>A (p.Y1092\*) is another rare mutation (less than 0.5% of CF-associated alleles) and has been shown to lead to instable mRNA (class I) <sup>1</sup>.

### Generation of induced pluripotent stem cell (iPSC) lines from plucked human hair keratinocytes

Keratinocytes grew to 75% confluence on Collagen IV (20 µg/mL) coated 6-well plates and were infected with  $5 \times 10^8$  proviral genome copies of hOKSM-dTomato lentivirus <sup>2</sup> in EpiLife medium

supplemented with HKGS (human keratinocyte growth supplement) (both Gibco), 10  $\mu$ M Rock inhibitor (Y-27632, Abcam) and 8  $\mu$ g/mL polybrene (Sigma) on two subsequent days. On the third day, keratinocytes were detached from the plates using TrypLE (Gibco) and transferred onto irradiated rat embryonic fibroblast (REF) feeder cells ( $3.5 \times 10^5$  cells per well irradiated with 30 Gy). Cells were cultured in hiPSCs medium (Knockout DMEM, 20% knockout serum replacement (KOSR, Gibco), 1% Penicillin/ Streptomycin (Sigma), 100  $\mu$ M NEAA (Sigma), 2 mM L-Glutamine (Sigma), 100  $\mu$ M  $\beta$ -mercaptoethanol (Merck Millipore), 50  $\mu$ g/mL L-Ascorbic acid (A4544, Sigma), 10 ng/mL FGF2 (PeproTech), 10  $\mu$ M Rock inhibitor) in a 5% CO<sub>2</sub> / 5% O<sub>2</sub> incubator and medium was changed daily. After 7-10 days, small colonies appeared, showing a typical hiPSC like morphology. Around 14 days later, hiPSC colonies had the appropriate size for mechanical picking and passaging onto irradiated REFs for further expansion <sup>34</sup>.

### **Culture of human pluripotent stem cells**

HUES8 (<http://stemcelldistribution.harvard.edu>), a standard human embryonic stem cell line, was used as control within this study. Permission to culture and differentiate these cells toward the pancreatic lineage was obtained from the Robert Koch Institute within the “79. Genehmigung nach dem Stammzellgesetz, erteilt am 28.05.2013. Genehmigung erweitert am 24.03.2015”. hiPSCs were initially cultured on feeder cells in hiPSC medium as described above. At passage 2 or 3 colonies were mechanically picked, transferred onto Matrigel-coated dishes (BD, 354277) and kept in FTDA medium <sup>5</sup> that contains DMEM/F12-GlutaMax (Invitrogen), 1x Insulin-Transferrin-Selenium-X (ITS-X, Invitrogen), 0.1% HSA (Biological Industries, Israel), 1% Lipid mix (Invitrogen), 1% Pen/Strep, 5 ng/mL FGF2, 0.5 ng/mL TGF- $\beta$  (PeproTech), 50 nM Dorsomorphin (Sigma), and 5 ng/mL Activin A (PeproTech). hPSCs were cultured in a 5% CO<sub>2</sub>/ 5% O<sub>2</sub> incubator and medium was changed daily. For splitting cells, hPSC colonies were incubated with 1 mg/mL Dispase (StemCell Technologies) for 4-7 min at 37°C and subsequently detached using a cell scraper. After centrifugation for 3 min at 1000 rpm, cells were resuspended in FTDA medium supplemented with 10  $\mu$ M Rock inhibitor and

transferred onto Matrigel-coated dishes. Ahead of differentiation, cells were split into single cells by applying TrypLE (Invitrogen) for 5 min at 37°C and were seeded in FDTA supplemented with 10 µM Rock inhibitor onto Matrigel-coated plates.

### **Immunocytochemistry**

Cells at different time points of differentiation were fixed with 4% paraformaldehyde (PFA) for 20 min and blocked with 5% normal goat or donkey serum (NGS or NDS, Jackson ImmunoResearch) and 0.1% Triton X-100 (Sigma) in PBS for 45 min. Samples were then incubated overnight at 4 °C with the primary antibodies diluted in blocking solution as indicated in **Supplementary Table S2**. After washing with PBS, fluorescence labelling was performed using the appropriate goat or donkey Alexa Fluor 488 and/or Alexa Fluor 568 secondary antibodies (Life Technologies, all diluted 1:500) for 90 min at room temperature. For SSEA4 staining samples were blocked in 5% NGS/PBS for 1 h and antibodies were diluted in 1% BSA (Serva Electrophoresis)/ PBS. Nuclei were stained with 1 µg/mL DAPI (Invitrogen). Images were captured using a BZ-9000 fluorescence microscope (Keyence) or an upright Axio Imager Z1 fluorescence microscope (Zeiss) equipped with a Zeiss CCD camera and analysed using Axiovision software (Zeiss).

### **Immunohistochemistry**

For staining of organoids, samples were either fixed with 4% PFA/ 10 % Sucrose in PBS for 20 min at RT followed by incubation in 25% sucrose solution overnight at 4°C before embedding in Tissue-Tek OCT compound (Sakura) with snap-freezing or fixed overnight at 4°C, embedded in 2% agarose and further processed for paraffin embedding (only applied for CK19/Amy staining). Immunofluorescence staining was carried out on serial sections of 8 µm (cryo) and 4 µm (paraffin) using standard techniques and as detailed above. In brief, cryosections were rehydrated for 30 min with H<sub>2</sub>O,

whereas paraffin sections were deparaffinized, rehydrated and subjected to heat induced antigen retrieval in sodium citrate buffer (pH 6).

Blocking as well as primary antibody dilutions (according to **Supplementary Table S2**) were performed in 10% normal goat serum and 0.2% Triton X-100. Following incubation with the secondary antibodies for 1 h, sections were mounted in ProLong Gold antifade reagent with DAPI (Life Technologies). Imaging was performed on an upright Apotome fluorescence microscope (Axio Imager Z1) equipped with a Zeiss CCD camera and Axiovision software was used for analysis. To quantify the relative amount of acinar- or duct-like cells, respectively, amylase and CK19 positive cells were counted in fluorescently labelled sections of at least 3 individual organoids with an estimated amount of > 50 % pancreatic cells.

### **Flow cytometry**

For flow cytometric analysis, cells at the DE-stage were harvested with TrypLE, washed with 2% FCS/ PBS (FACS buffer) and incubated in 10% FCS in PBS for 20 min on ice. After washing, cells were stained with 1 µl of CXCR4-PE antibody for 40 min and 0.5µl of c-Kit-APC antibody (Supplementary Table 2) for additional 15 min in 50 µl FACS buffer on ice. Afterwards, cells were washed, resuspended in FACS buffer, counterstained with DAPI (100 ng/mL) to assess viability and analysed on an LSRII flow cytometer (BD Biosciences).

At the PP stage, cells were dispersed to single cell suspension using TrypLE, washed with PBS and fixed in 4% PFA for 20 min on ice. After washing twice with PBS, cells were blocked in 5% NDS/ 0.1% Triton X-100 in PBS for 30 min on ice. Cells were washed with 2% NDS/ 0.1% Triton X-100 and then incubated with the primary antibodies (anti-PDX1 and anti-NKX6.1 diluted as indicated in **Supplementary Table 2**) in blocking solution overnight at 4°C. Next, cells were washed twice and incubated with donkey-anti-goat Alexa Fluor 488 and donkey-anti-mouse Alexa Fluor 568 (diluted 1:500 in) for 90 min on ice. Finally cells were washed again twice and analysed on an LSRII flow

cytometer (BD Biosciences).

### **Electron microscopy**

Organoids cultured for 12 days in suspension were collected with a cut 200  $\mu$ L tip into a 15 mL falcon with PBS and spun down at 400 rpm for 4 min. For transmission electron microscopy, organoids were fixed in 0.1 M phosphate buffer pH 7.3, containing 2.5% glutaraldehyde, 1% sucrose and osmicated for 1 h in 2% OsO<sub>4</sub>. Afterwards they were dehydrated in graded series of ethanol, contrasted in 2% uranyl acetate and embedded in epoxy resin (Sigma) at 60°C. Thin sections of 70-80 nm were cut with a diamond knife on a Reichert ultramicrotome and collected on 300 mesh grids. The sections were contrasted with 0.3% lead citrate for 1 min and analysed on the transmission electron microscope EM 10 (Zeiss) at 80 kV.

### **Carbonic anhydrase assay**

For evaluation of carbonic anhydrase activity we performed a colorimetric assay based on the imidazole-Tris method<sup>6</sup> using phenol red as a pH indicator. Organoids from suspension culture were collected in a microfuge tube, spun down at 800 g for 1 min, washed with PBS and homogenized in lysis buffer (150 mM NaCl, 50 mM Tris-HCl, pH 7.2, 2 mM EDTA, 1% NP40 (#74385, Fluka), supplemented with protease inhibitors) at 4°C. Primary ductal cells isolated from mouse pancreas processed in the same way were included as positive control. To assess CA activity the protein lysate or carbonic anhydrase II from bovine erythrocytes (used to establish the standard curve first, obtained from Sigma) were mixed with incubation buffer (60 mM imidazole, 30 mM Tris base, 1 mM phenol red, 0.1% BSA, pH 9.6), gassed with CO<sub>2</sub> at a constant flow rate, and the time required to reach the end point of the colour change was measured.

### **Quantitative real-time PCR**

RNA was extracted with the GeneJet RNA Purification kit (Thermo Scientific) according to the manufacturer's instructions and eluted in 60 µl RNase-free H<sub>2</sub>O. Subsequently cDNA was synthesized using the iScript cDNA synthesis kit (BioRad). 500 ng cDNA were used as a template for quantitative real-time PCR (qPCR) performed by using SensiMix SYBR kit (Bioline) according to the supplier's instructions in a Rotor Gene qPCR Cycler (Qiagen) or Light Cycler 480 II (Roche). PCR conditions were as follows: denaturation at 95 °C for 10 min, followed by 40 cycles at 95 °C for 15 s, 60 °C for 30 s and 72 °C for 15 s. Internal standards (house-keeping gene) and samples were simultaneously amplified and melting curve analysis was performed to verify the specificity of the PCR amplification products. mRNA levels of the target genes were normalized to the house-keeping gene *HMBS* (hydroxymethylbilane synthase). All primers were obtained from Qiagen (QuantiTect Primer Assays)<sup>7</sup> except for CASP3 (F: TGGTTCATCCAGTCGCTTTG, R: AATTCTGTTGCCACCTTTCG) and XBP1-spliced (F: TGCTGAGTCCGCAGCAGGTG, R: GCTGGCAGGCTCTGGGGAAG) primer pairs that were ordered from Biomers and CYCLIN D1 from Sigma.

### **Microarray and gene expression data analysis**

RNA quality was controlled on the 2100 Bioanalyzer. Quality-approved RNA with a RIN value higher than 9.0 was used for gene expression analysis, which was performed using the SurePrint G3 Human GE 8x60K (Design ID 028004) Microarray Kit. 100 ng of each sample was labelled with the Low Input Quick Amp Labeling Kit according to the manufacturer's instructions. Slides were scanned using a microarray scanner (Agilent Technologies).

The DNA microarray data were pre-processed and normalized by the limma package<sup>9</sup>. Unsupervised hierarchical clustering was performed to validate the pluripotent nature of the established iPSC lines by comparing their expression profiles to published transcriptome data from human embryonic stem cells (H1, GSM1040172; H9, GSM1040173), iPSCs established elsewhere (hiPSC\_1, GSM1040179;

hiPSC\_2, GSM1040180) and somatic cells including peripheral blood monocytes (PBMN\_1, GSM1040233; PBMN\_2, GSM1040234), cord blood cells CB\_1, GSM104023; CB\_2, GSM1040232) and human dermal fibroblasts (HDF, GSM1040229).

Microarray data from control and CF-derived pancreatic organoids were combined with reference gene expression profiles, including pluripotent stem cells (GSE56130, GSE63101), human adult pancreas (GSE72492), acinar or small/large ductal cells (E-MTAB-463), human keratinocytes (GSE63101) and human foreskin/lung fibroblasts (GSE55820), using R package *inSilicoMerging*. The combined data sets were then subjected to unsupervised hierarchical clustering and heat map analysis to reveal the similarity or dissimilarity between samples. In the heat map analysis, in-house and publicly available gene sets were used. In-house acinar and ductal-related gene sets (PSC vs. Acinar, PSC vs. Ductal, PSC vs. Acinar/Ductal, ME vs. Acinar, ME vs. Ductal and ME vs. Acinar/Ductal) were defined using up-regulated genes from PSC (or ME) to acinar and ductal cells, respectively. The publicly available gene sets (Acinar\_Dorrell et al., Ductal\_Dorrell et al. and Acinar/Ductal\_Dorrell et al.) were derived from results of differentially expressed genes analysis from Dorrell et al.<sup>10</sup>. Gene names are given in **Supplementary Table 4**.

For gene set enrichment analysis (GSEA)<sup>11</sup> relevant gene sets were retrieved from the molecular signature database of the GSEA website (<http://www.broadinstitute.org/gsea/msigdb/index.jsp>). The analysis was performed using the GSEA-P-R program downloaded from the GSEA website.

### **Analysing RNA-sequencing data**

RNA-Seq data (GSE61475<sup>12</sup> for ES and ME cells and GSE79469<sup>13</sup> for acinar and ductal cells) were converted to fastq files by SRA Toolkit<sup>14</sup> and subjected to quality control check and preprocessing steps using fastQC<sup>15</sup>. Then alignment to the human genome built 38 (hg38) was done with STAR aligner which can detect sliced transcripts from RNA-seq data. More than 100 million reads per sample were mapped to the genome. We calculated differentially expressed genes for each



comparison individually by comparing ES or ME cells versus acinar or ductal cells. Normalization and differential expression analysis were performed with Cufflinks, which estimates the relative abundances of transcripts based on how many reads support each one, taking into account biases in library preparation protocols <sup>16</sup>. We chose an FDR of 0.01 and a log<sub>2</sub> fold change of 2 to detect differentially expressed genes in acinar or ductal differentiation. Gene names are given in **Supplementary Table 4**.

### **Generation of pancreatic organoids from Nkx6.1-GFP purified PPs**

The NKX6.1-GFP HES3 reporter cell line (NKX6.1<sup>GFP/w</sup>) was kindly provided by Prof. Andrew Elefanty (Murdoch Childrens Research Institute, Melbourne, Australia). Differentiation was performed as explained above and outlined in **Figure 1** with the following modifications: basal medium for DE stage (day 0-3) was MCDB131 supplemented with 10 mM glucose, 1.174 g/L sodium bicarbonate, 0.5% FAF-BSA and 2 mM L-Glutamine. From day 3 to 6 cells were treated with 50 ng/mL FGF10 and 0,75 μM Dorsomorphin in RPMI containing 0.4% FCS, 0.1% ITS-X, 2 mM L-Glutamine and 0.5 mM ascorbic acid (based on <sup>17</sup>).

After 12 days of PP differentiation, cells were dissociated into single cell suspension with TrypLE, washed with 2 % FCS/PBS FACS buffer and sorted according to GFP signal intensity using FACS Aria III cell sorter (BD Biosciences). Purified cells were centrifuged and resuspended in day 12 medium supplemented with Rock inhibitors Y-27632 (10 μM) and thiazovivin (0.5 μM, Calbiochem). Further cultivation was performed as detailed for 3D pancreatic organoid culture in suspension.

### **Measurement of digestive enzyme activity (Amy, Tryp, Ela)**

Trypsin and elastase kinetic activity was measured as kinetic over 60 min at 37°C in buffer containing 100mM Tris, 5mM CaCl<sub>2</sub> at pH 8.0 by fluorometric assay using fluorochrome substrates, trypsin R110-(CBZ-Ile-Pro-Arg)<sub>2</sub> for trypsin activity and R110-(CBZ-Ala-Ala)<sub>2</sub> for elastase activity, both from

Invitrogen. Amylase was determined by colorimetric assay using Amyl-Kit obtained from Roche-Hitachi as a kinetic over 30 min at 37°C.

Enzyme activity was determined in triplicate cell pellets of pancreatic organoids generated over one passage in suspension culture. Trypsin and elastase activity was calculated as relative fluorescence units (RFU), which represents substrate cleavage/time against total protein content. Amylase activity was calculated against purified enzyme (porcine amylase obtained from Sigma).

### **CFTR activity**

Organoids growing for 6 days in matrigel on a glass chamber slide were incubated with the fluorescent chloride ion indicator MQAE (N-(Ethoxycarbonylmethyl)-6-methoxyquinolinium bromide, 8 mM, from Enzo), 20 µM forskolin and 100 µM IBMX for 4 h at 37°C. Dye loading and CFTR activation was performed in Standard Ringer's solution (composed of 140 mM NaCl, 5 mM KCl, 5 mM HEPES, 1 mM MgCl<sub>2</sub>, 1.5 mM CaCl<sub>2</sub>, 5 mM glucose, pH 7.4) to promote intracellular chloride influx and transport into the organoid lumen.

Live images were captured on a Leica TCS SP8-HCS confocal microscope using a HC PL FLUOTAR 10x/0.30 DRY objective. MQAE was excited using the 405 nm laser line and emission was detected from 450-500 nm. Images represent single confocal sections through 3D structures.

### **mRNA transfection of pancreatic organoids**

Generation of modified mRNA was carried out as described before<sup>18</sup> and the modifications used in the present study were 25% s2UTP+25% m5CTP (with 25% incorporation of 2-thiouridine-5'-triphosphate and 5-methylcytidine-5'-triphosphate each).

Organoids growing in suspension culture were first mechanically dissociated and further dispersed using collagenase IV (Invitrogen)/dispase (StemCell Technologies) (1 mg/ml) for 8 min followed by incubation in TrypLE for 4 min at 37°C with occasional trituration. Cells were then centrifuged at 1000 g for 5 min and resuspended in DMEM/F12 supplemented with 1x N2, 0.5x B27 (both from gibco)

and 10  $\mu$ M ROCK-inhibitor (abcam). Approximately  $0.8-1 \times 10^5$  cells in 200  $\mu$ l medium were seeded per well of a 48-well plate (Nuclon $\Delta$ Surface).

Transfection using Lipofectamine<sup>®</sup> 2000 (Invitrogen) was performed according to the manufacturer's instructions. In brief, 1  $\mu$ g dsRed- or human CFTR-mRNA and 1.5  $\mu$ l Lipofectamine reagent were diluted in Opti-MEM medium (gibco), mixed and added to the cells (50  $\mu$ l per 48-well). After centrifugation of the plate at 400 g for 10 min, the cells were incubated for additional 4 h at 37°C while briefly shaking the plate every hour. Next the cell clusters were spun down in a collection tube (at 1000 g) and resuspended either in FN-medium with ROCK-inhibitor or in matrigel for further suspension- or matrigel-based culture, respectively, as described above.

Forskolin-induced swelling assay was carried out as detailed before on organoids that developed 4 days after dsRed- or CFTR-mRNA transfection. For quantification, 12 organoids out of 3 independent wells showing no obvious signs of shrinkage were analysed using ImageJ.

### **Transplantation of pancreatic organoids**

For xenotransplantation, athymic NMRI-nu/nu mice (strain: RjOrl: NMRI-Foxn1nu /Foxn1nu) from Envigo RMS Spain, S.L. (formerly known as Harlan) were used. Living organoids were shipped to the Instituto de Investigaciones Biomédicas "Alberto Sols" CSIC-UAM, Spain for transplantation. Organoids generated after 12 days in monolayer and 9 days in FN-based suspension culture differentiation were spun down at 400 g for 4 min and repeatedly resuspended in ice-cold BE3 medium to generate smaller pieces by pipetting up/down with a glass Pasteur pipette. After centrifugation at 4 °C (500 rpm, 5 min), the organoid pieces were resuspended in a 1:1 mixture of GFR-Matrigel and BE3 medium to approximately  $10^6$  cells/40  $\mu$ l and kept on ice.

All animal experiments were performed in compliance with the institutional guidelines for the welfare of experimental animals approved by the Universidad Autonoma de Madrid Ethics Committee (CEI 60-1057-A068) and La Comunidad de Madrid (PROEX 335/14).

Anaesthesia of the mice was achieved with isoflurane inhalation. After anaesthetic had taken effect,

mice were wiped with ethanol-containing skin antiseptic. A small cutaneous midline incision was performed (0.8 cm) and a small subcutaneous pocket was prepared. An equally small incision (0.8 cm) was made into the peritoneum, the pancreas was mobilized and exposed. Approximately  $10^6$  organoid cells in matrigel/medium suspension were injected into the corpus of the (WT (HUES8) and CF (CFTR-P1 #11), n=4 each). The pancreas and spleen were then carefully repositioned in the abdomen. The peritoneum was then closed with a single stitch suture using 6-0 Prolene sutures. The skin was closed with surgical staples. During the next 48 h, mice were regularly visited and received Tramadol as analgesic into the drinking water for one week after transplantation.

Organs were harvested 5 weeks after injection. Graft tissue specimens were fixed in 4% phosphate-buffered paraformaldehyde overnight at 4 °C and embedded in paraffin. Immunohistochemical analyses were performed on serial sections of 4  $\mu$ m using standard techniques. Details on antibodies used are provided in **Supplementary Table S3**. Images were taken with Olympus BX40 microscope.

## Supplementary Results

### Pancreatic progenitors from human pluripotent stem cells

For commitment to the pancreatic lineage a protocol from Chetty *et al.*<sup>19</sup> was initially implemented as the basis for further optimization and fine-tuning to develop a tailored protocol matching our specific requirements of an exocrine disease modelling platform. Herein, keratinocyte growth factor (KGF, also termed FGF7) was used to pattern the DE into gut tube endoderm for 2 days, followed by retinoic acid, KGF and Activin A treatment and inhibition of Sonic hedgehog (SHH) and bone morphogenetic protein (BMP) signalling with the small molecule compounds SANT1 and LDN193189<sup>20,21</sup> for 4 days to generate pancreatic endoderm (see schematic in **Supplementary Figure S1A**). The SHH antagonist SANT1 binds to Smoothed thus preventing downstream signaling<sup>22</sup>. LDN193189 is an inhibitor of SMAD1/5/8 phosphorylation by BMP type 1 receptors ALK2, 3, and 6<sup>246</sup> but has also been shown to efficiently affect non-SMAD mediated BMP signalling branches (p38, ERK1/2 and Akt)<sup>21</sup>.

To validate the applicability of this basic differentiation protocol and also the factors for further titration and optimization experiments, endodermal and pancreatic progenitor cell markers were analysed during the course of differentiation. The combination of the factors listed above progressively induced the expression of *PDX1* and *PTF1A*, essential transcription factors for human pancreas development<sup>23-26</sup>, gaining highest levels after 10 days of differentiation as described previously<sup>19</sup> (**Supplementary Figure S1B**). In line with Chetty *et al.*, we observed weak induction of *NKX6.1* by qPCR analysis at d10 giving a first hint for the emergence of pancreatic progenitor cells. However, this marker was not yet detectable in PE cells on protein level as demonstrated by flow cytometric analysis (**Supplementary Figure S1C**). For *PDX1* we saw a nice correlation between the qPCR and flow cytometry results showing increasing expression at three consecutive days till the PE stage (**Supplementary Figure S1B,C**). Thereby, at least 60 % *PDX1*-positive cells resembling

pancreatic epithelium were gained reaching up to 90 % in certain cell lines (**Supplementary Figure S1C**).

Differentiation protocols to direct human PSCs towards exocrine pancreatic cell types remain limited to two studies<sup>27,28</sup>. We tested the following compounds for further evaluation to generate an acinar-/ductal-prone pancreatic progenitor cell: FGF10 is supposed to increase the PDX1-positive progenitor population based on developmental clues from mesenchymal cells inducing proliferation in the pancreatic epithelium<sup>29-31</sup>, while nicotinamide (NA) and FGF2 have been previously applied to promote a more mature pancreatic cell fate<sup>32-34</sup>. Indolactam V has been identified in a high-content chemical screen to induce differentiation of human ES cell-derived gut tube endoderm into PDX1-expressing cells<sup>32</sup>. The reason to include this small molecule activator of protein kinase C (PKC) signalling into our testing was the observation that although Chen *et al.* aimed to derive endocrine, insulin-producing cells, instead ILV-treated cells gave rise to a lot of amylase-positive cells indicating an exocrine fate conversion<sup>32</sup>.

When differentiation was pursued using FGF10 and ILV from day10 to 14, *NKX6.1* expression became significantly upregulated. Nevertheless, the pancreatic progenitor markers *PTF1A* and also weakly *CPA1* exhibited a decrease in their expression levels from the PE (d10) to the PP (d14) stage (**Supplementary Figure S3E**). This result indicated that the formation of true PPs co-expressing all critical markers was not yet optimal especially with respect to our aim of inducing progenitors with an exocrine fate requiring high levels of *CPA1* and *PTF1A*.

### **A tailored protocol to generate true pancreatic progenitor cells**

So far our efforts have shown that (i) at day 10 of the differentiation true PPs are not yet formed, (ii) in principle the substances are suitable to direct pancreatic differentiation, (iii) we could generate a lot of PDX1-expressing cells but as in previous studies found low abundance of cells co-expressing *PDX1* and *NKX6.1* together with other PP markers. Thus, a stepwise protocol optimization was

performed primarily in HUES8 embryonic stem cells for generating PDX1/NKX6.1-double positive cells. This was assessed by FACS and qPCR analysis particularly at day 14. We determined day 14 as the optimal time point to detect emerging true PPs, based on the observation that *NKX6.1* is induced here and that the day10 cell population still lacks NKX6.1 protein expression (**Figure 1D,E; Supplementary Figure S1B**).

First the intermediate stage from DE to pancreatic endoderm (day4-10) was modified by testing a set of growth factors and small molecules based on previous publications<sup>19 28 32 35</sup> in various combinations while the readout was set to day14 as detailed in **Supplementary Figure S2A**. Interestingly, the variations outlined in **Supplementary Figure S2A** as conditions 2a-e produced the best results exceeding the amount of PPs obtained under the two other conditions (**Supplementary Figure S2A**, conditions 1 and 3). The highest percentage of PDX1/NKX6.1-positive cells at day14 was achieved by omission of KGF and Activin A and addition of the MEK inhibitor PD0325901 (PD) (**Supplementary Figure S2**, condition 2e) from day 6-10 to the conditions used before (**Supplementary Figure S1A**). The inclusion of the small molecule PD was suggested by a study that analysed in detail signalling pathways involved in lineage bifurcation<sup>36</sup> to eliminate hepatic fate induction<sup>36 37</sup>.

Despite the fact that condition 3 included a more complex factor combination, different timing for DE patterning<sup>36</sup>, and comprised the same factors from day 5-10, this condition delivered around 40% less double-positive cells compared to the best condition (see condition 2e vs 3 in **Supplementary Figure S2B**). This illustrates the impact of early fate determinants on the final outcome and again confirms our choice of staging and patterning. To sum up, retinoic acid, SANT1, LDN and PD were selected as inducing factors for the differentiation step from day6 to 10.

Next, in a separate optimization step, guidance cues for the commitment from PE to the PP stage (day10-14) were precisely titrated as illustrated in **Supplementary Figure S3A** taking into account not only gene expression of PP markers (*PTF1A*, *NKX6.1*) but also of other gut tube patterning markers such as *CDX2* and Albumin (*ALB*) to exclude intestinal or hepatic fate conversion based on qPCR

analysis (**Supplementary Figure S3B,C**). Besides increasing the rate of the PP population, the goal on the other hand was to enhance exocrine differentiation propensity by looking for factors that specifically induce an upregulation of *PTF1A* and *CPA1*, both marker genes of progenitors with an acinar fate.

The following factors were included into our testing for this phase:

BMP has been shown to be a mesenchymal factor required for pancreatic epithelial branching and exocrine differentiation in mice<sup>38 39</sup>. We found that treatment of the day 10 PE population with different concentrations of BMP4 could increase the expression of *PTF1A* and induce *NKX6.1*. However, this was accompanied with a strong upregulation of *ALB*, which was not unexpected since BMP-signalling also mediates liver progenitor specification<sup>37</sup> (**Supplementary Figure S3B,C**).

The approach of TGF- $\beta$  inhibition was inspired by studies in rodents showing that Follistatin, a mesenchyme-derived factor, inhibits TGF- $\beta$  family signalling to enable exocrine tissue development<sup>40 41</sup>. Using the small molecule SB431542 (SB), an inhibitor of TGF- $\beta$  type I activin receptor-like kinase receptors ALK4, 5, and 7, more selectively increased the expression level of *PTF1A* in a concentration dependent manner, while *NKX6.1* was also upregulated, though to a similar level at both tested SB-concentrations (**Supplementary Figure S3B**).

Notch signalling is supposed to play divergent roles at various stages during pancreatic cell specification mediating progenitor maintenance while blocking exocrine differentiation<sup>39 42 43</sup>. Hence the effect of inhibiting Notch signalling was tested for the protocol optimization by applying the  $\gamma$ -secretase inhibitor X. This treatment did not increase *PTF1A* expression from day10 to day14 but induced *NKX6.1*. *ALB* was slightly increased compared to the treatment with SB while the *CDX2* expression level remained unchanged (**Supplementary Figure S3B,C**).

Two members of the FGF family were analysed in this optimization step due to the assigned positive effect on progenitor cell expansion<sup>29</sup> and reports on their impact on exocrine cell differentiation from human PSCs<sup>28 44</sup>. FGF7 seemed to be more potent than FGF10 in upregulating both *PTF1A* and



*NKX6.1* but it also caused a twofold higher *ALB* expression. On the other hand, in combination with a higher (24mM final) concentration of glucose, FGF10 strongly increased *PTF1A* and *NKX6.1* expression (**Supplementary Figure S3B,C**).

Summarized, the experiments revealed a strong positive effect of TGF- $\beta$  signalling inhibition selectively on *PTF1A* expression and showed an upregulation of both PP markers, *PTF1A* and *NKX6.1*, by applying FGF10 in high glucose medium and had lowest inductive effect on other lineages such as hepatic or intestinal fate (**Supplementary Figure S3B,C**). The set of factors that proved to be effective during PP induction from PE, including ILV, FGF10, SB and high glucose, was finally combined together with the improved conditions identified before for the differentiation from DE to PE, constituting to the “new” differentiation protocol summarized in **Supplementary Figure 3D** and **Figure 1A**.

As illustrated for *CPA1*, *PTF1A* and *NKX6.1* in **Figure 1C** the optimized conditions led to a strong increase in PP marker gene expression at day14 compared to the Chetty et al. protocol<sup>19,28</sup>, which we had used as initial template for optimization (compare **Supplementary Figure 1A**) and significantly raised their level from day10 to day14 (**Supplementary Figure 3E,F**).

## Supplementary Figures

**Supplementary Figure S1.** Commitment towards PDX1 positive pancreatic endoderm. **(A)** Outline of the *in vitro* differentiation protocol based on Chetty et al.<sup>19 28 45</sup> indicating the growth factors and small molecules applied at each developmental stage. PSC: pluripotent stem cell, DE: definitive endoderm, GTE: gut tube endoderm, PE: pancreatic endoderm, ActA: Activin A, RA: Retinoid acid. **(B)** Increasing expression of pancreas specific transcription factors (*PTF1A*, *PDX1*) at consecutive days from DE to PE stage. The posterior foregut marker *FOXA2* is maintained at high levels while *SOX17* expression rapidly decreases during pancreatic differentiation (d4-10). Slight induction of *NKX6.1* is first detectable by qPCR analysis at d10. mRNA levels measured in biological duplicates normalized to *HMBS* are depicted as mean  $\pm$ SEM. **(C)** FACS analysis at d8 to d10 confirmed the gradual induction of PDX1 on protein level, but showed no NKX6.1 positive cells at d10 of differentiation. Percentage of PDX1-positive cells is depicted in the FACS plots. Undifferentiated ES cells (d0) were included as negative control. All experiments were performed in HUES8 cells. DE: definitive endoderm, PE: pancreatic endoderm, d: day. Target mRNA expression relative to *HMBS* is depicted as mean  $\pm$ SEM (n=2).

### Supplementary Figure 1

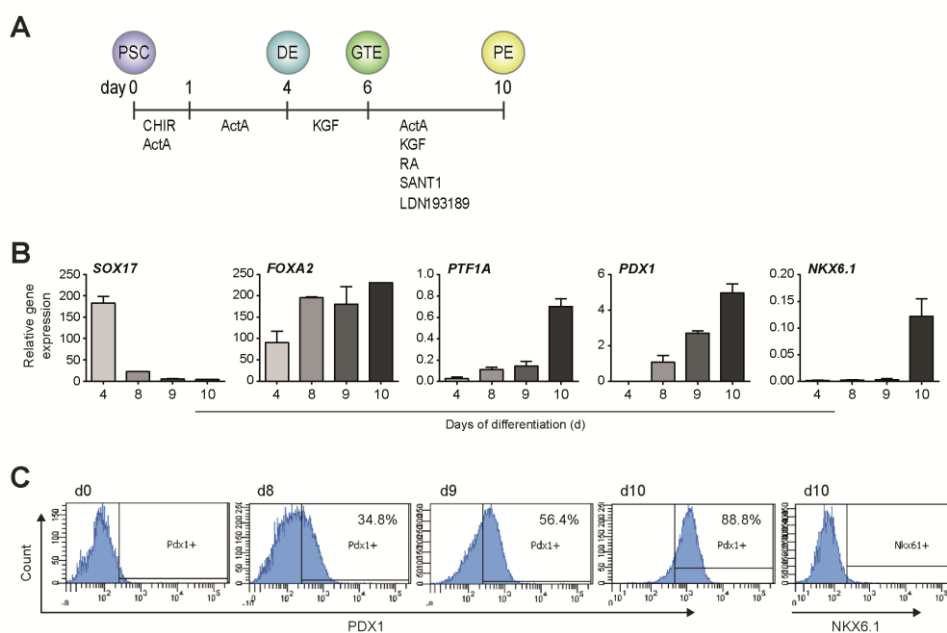

**Supplementary Figure S2.** Protocol optimization at day 4-10 during PSC differentiation. **(A)** Schematic overview of the various tested growth factor combinations to generate high yields of NKX6.1/PDX1 double positive pancreatic progenitor cells. Conditions were modified during the transition from the DE to PE stage and judged based on flow cytometric analysis for the PP markers PDX1 and NKX6.1 at day14. **(B)** Tabular overview of FACS-results for HUES8 cells after directed differentiation according to conditions 1, 2a-e and 3 as detailed in (A). **(C)** FACS plots for PP cells generated using the old differentiation protocol (**Supplementary Figure1A** = 2d) or condition 2e involving omission of TGF- $\beta$ /Nodal- and FGF-activating cytokines and inhibition of MEK/ERK-signalling from d6-10 (2e) which produced the best result. (PSC: pluripotent stem cell, DE: definitive endoderm, GTE: gut tube endoderm, PE: pancreatic endoderm, PP: pancreatic progenitor, ActA: Activin A, CHIR: CHIR99021, Cyclo: KAAD-Cyclopamine (SHH antagonist), RA: Retinoic acid, IWP-2 (Wnt inhibitor), ILV: Indolactam V, LDN: LDN-193189S, PD: PD0325901, RSL: RA + SANT1 + LDN, AK: Activin A + KGF, d: day).

## Supplementary Figure 2

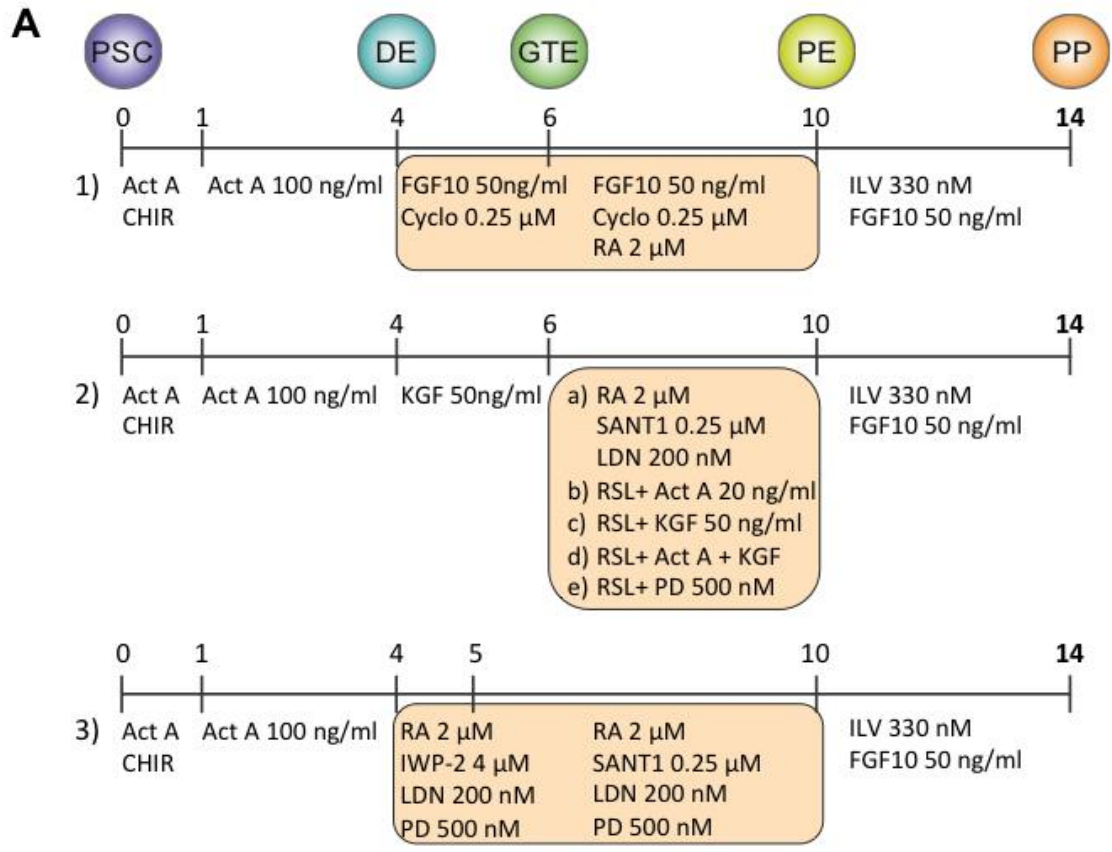

**B**

| Condition | % of positive cells at d14 |            |
|-----------|----------------------------|------------|
|           | PDX1/NKX6.1                | PDX1 total |
| 1)        | 19.8                       | 85.4       |
| 2a)       | 57.0                       | 86.5       |
| 2b)       | 52.1                       | 76.2       |
| 2c)       | 51.1                       | 73.7       |
| 2d)       | 53.7                       | 80.8       |
| 2e)       | 71.9                       | 86.4       |
| 3)        | 41.5                       | 73.5       |

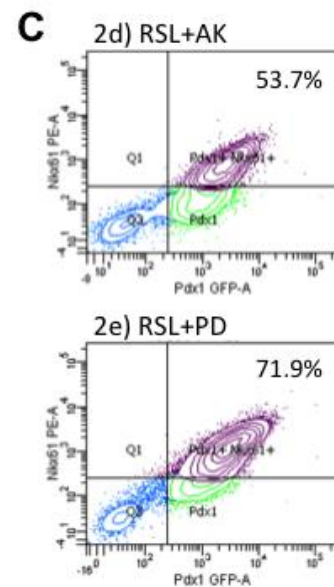

**Supplementary Figure S3.** Protocol optimization from d10-14 during PSC differentiation. **(A)** Schematic overview of the various growth factors tested during differentiation from the pancreatic endoderm (PE) to the pancreatic progenitor (PP) stage to increase the expression of *PTF1A* and *NKX6.1* at day14. **(B)** Gene expression based on qPCR analysis of the PP markers *PTF1A* and *NKX6.1* as well as **(C)** *CDX2* and *ALB* (Albumin) marking duodenal and hepatic cell specification, respectively, after treatment with the indicated factors according to the protocol depicted in **(A)**. Conditions that were further integrated into the “new” PP-protocol as detailed in **(D)** are highlighted in red. Differentiation was performed in duplicates for each condition using HUES8 cells. **(E,F)** Gene expression analysis during pancreatic differentiation revealing a strong increase in PP markers from d10 to d14 when applying our own optimized protocol **(F)** compared to Chetty et al. (protocol as condition 2d in Supplementary Figure 2A) **(E)** (n=3 independent experiments, 2 biol. replicates). mRNA levels are presented as mean  $\pm$ SEM and were normalized to *HMBS*. Statistical significance was determined by two-tailed *t*-test, \*\*\* $P$ <0.005, \*\*\*\* $P$ <0.001. PSC: pluripotent stem cell, DE: definitive endoderm, GTE: gut tube endoderm, ActA: Activin A, CHIR: CHIR99021, RA: Retinoic acid, LDN: LDN-193189, d: day.

Supplementary Figure 3

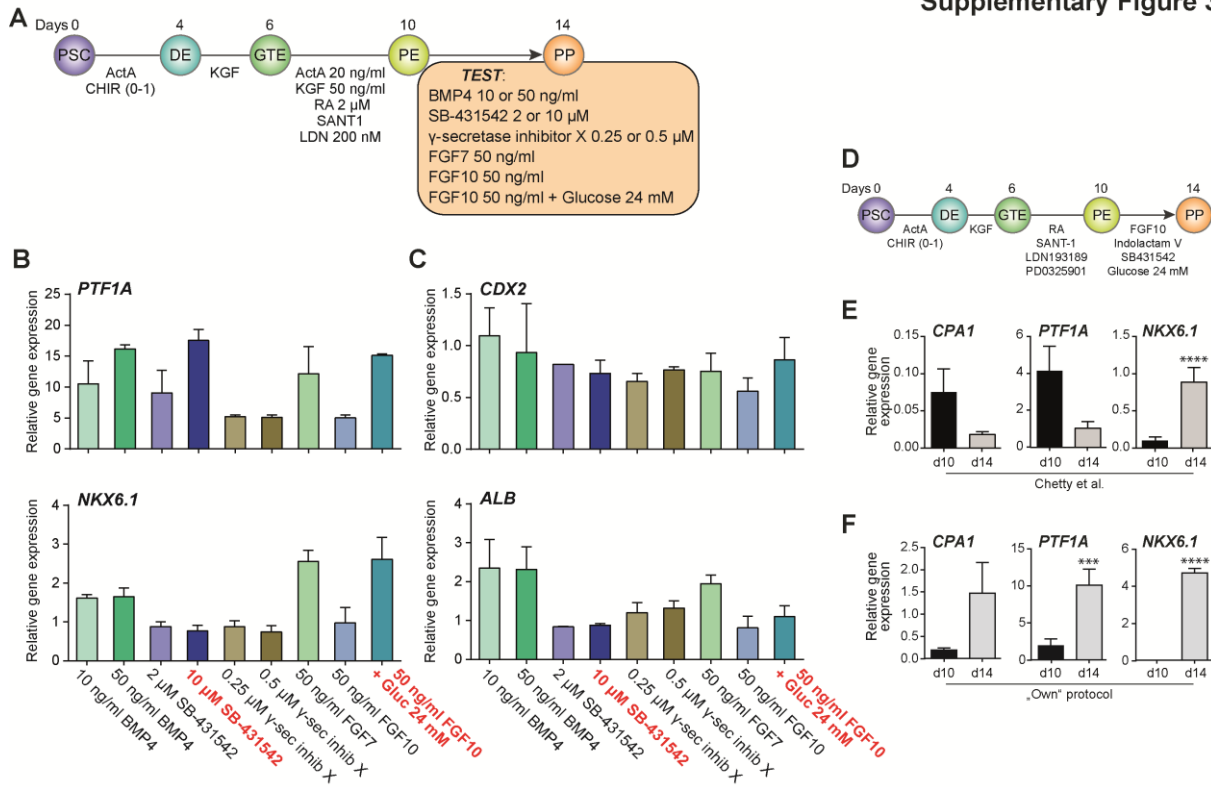

**Supplementary Figure S4.** No relevant cell death during PP differentiation. (A-D) Phase contrast images (A) and corresponding immunostaining at key stages (B-D) of differentiating hESC cultures over the course of pancreatic progenitor cell formation. (E,F) FACS analysis for cell viability at the DE stage based on DAPI staining of dead cells. (G) Immunofluorescent staining for cleaved caspase 3 and Ki67 revealing low degree of apoptosis and considerable proliferation at the PP stage. Scale bars: 100  $\mu$ m.

Supplementary Figure 4

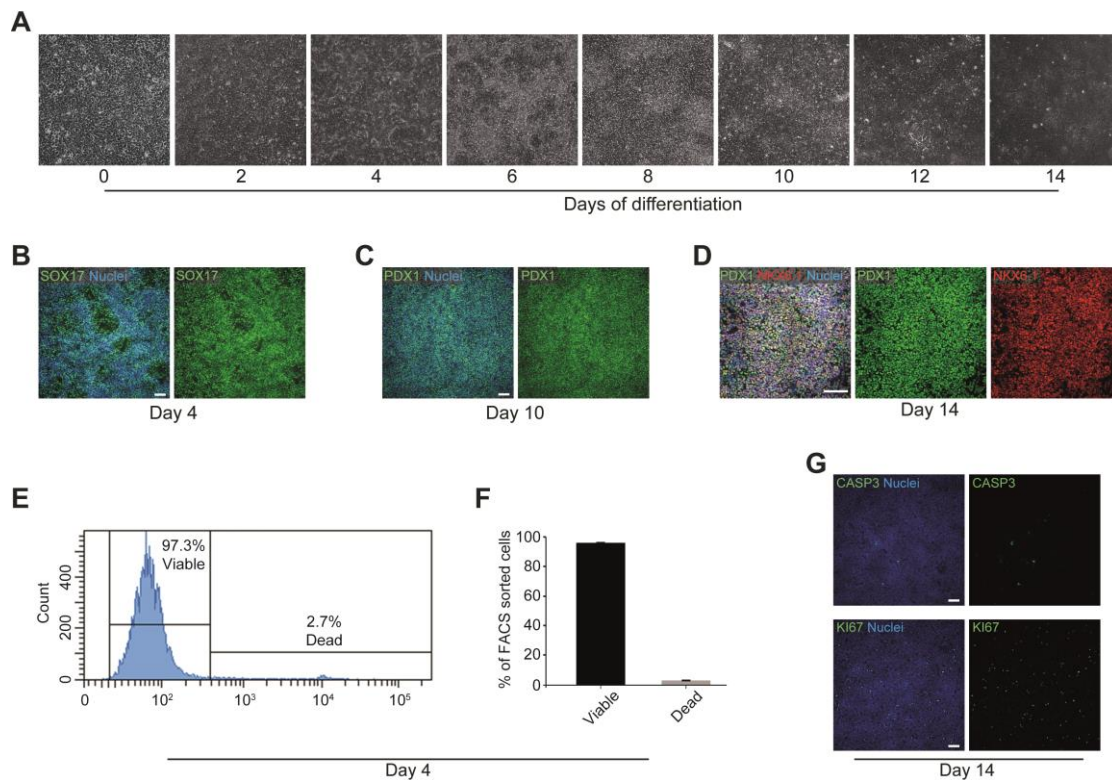

**Supplementary Figure S5.** (A) Phase contrast documentation of a growing pancreatic organoid derived from HUES8 human ESCs in matrigel culture over 12 days following stepwise PP differentiation. (B) Schematic of NKX6.1 gene locus in the human NKX6.1-GFP reporter ESC-line that was used to generate organoids shown in (C-E). (C) Organoids developing out of the NKX6.1-GFP-positive cell population purified by FACS after 12 days of PP differentiation from NKX6.1-GFP ESCs. Arrows and arrowheads point at NKX6.1-negative and positive structures, respectively. Note that GFP signal correlates with dense, compacted cell cluster morphology. (D,E) Immunostaining for the indicated markers demonstrating the emergence of pancreatic acinar and ductal lineage cells from sorted NKX6.1-GFP-positive PPs. (D) Expression of progenitor cell marker NKX6.1 (arrow) is broadly excluded from amylase (AMY) positive structures (arrowhead). (E) SOX9-positive duct-like structures (arrowhead) are mostly negative for chymotrypsin C (CTRC) while residual SOX9 expression can be detected in CTRC-positive acinar-like cells. Scale bars: 50  $\mu$ m.

# Supplementary Figure 5

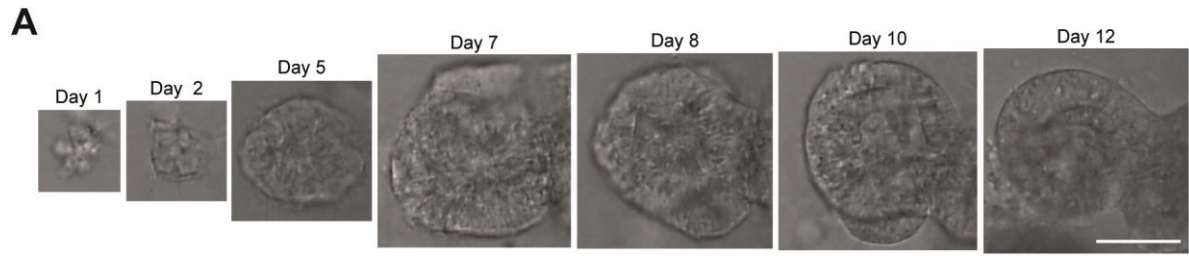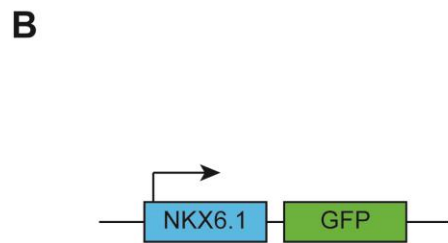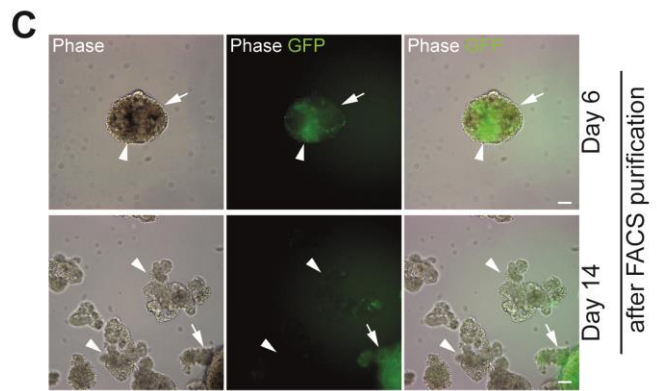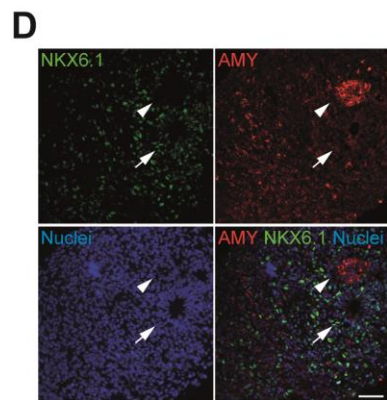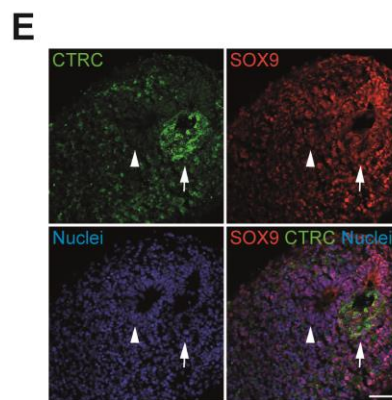



**Supplementary Figure S6.** (A) Bioinformatics pipeline for definition of Acinar and Ductal cells gene sets from RNA-Seq data. (B,C) The volcano plots from the differential expression analysis in the comparison between pluripotent stem cells (PSC) and acinar cells (B) and between mesodermal (ME) cells and ductal cells (C) both from young donors. (D,E). The combined dataset (shown in **Figure 2M**) were analysed using in-house generated acinar or ductal-related gene sets (defined as in A-D). (F) The combined datasets were analysed using public available acinar or ductal-related gene sets derived from Dorrell et al.<sup>10</sup>.

**Supplementary Figure 6**

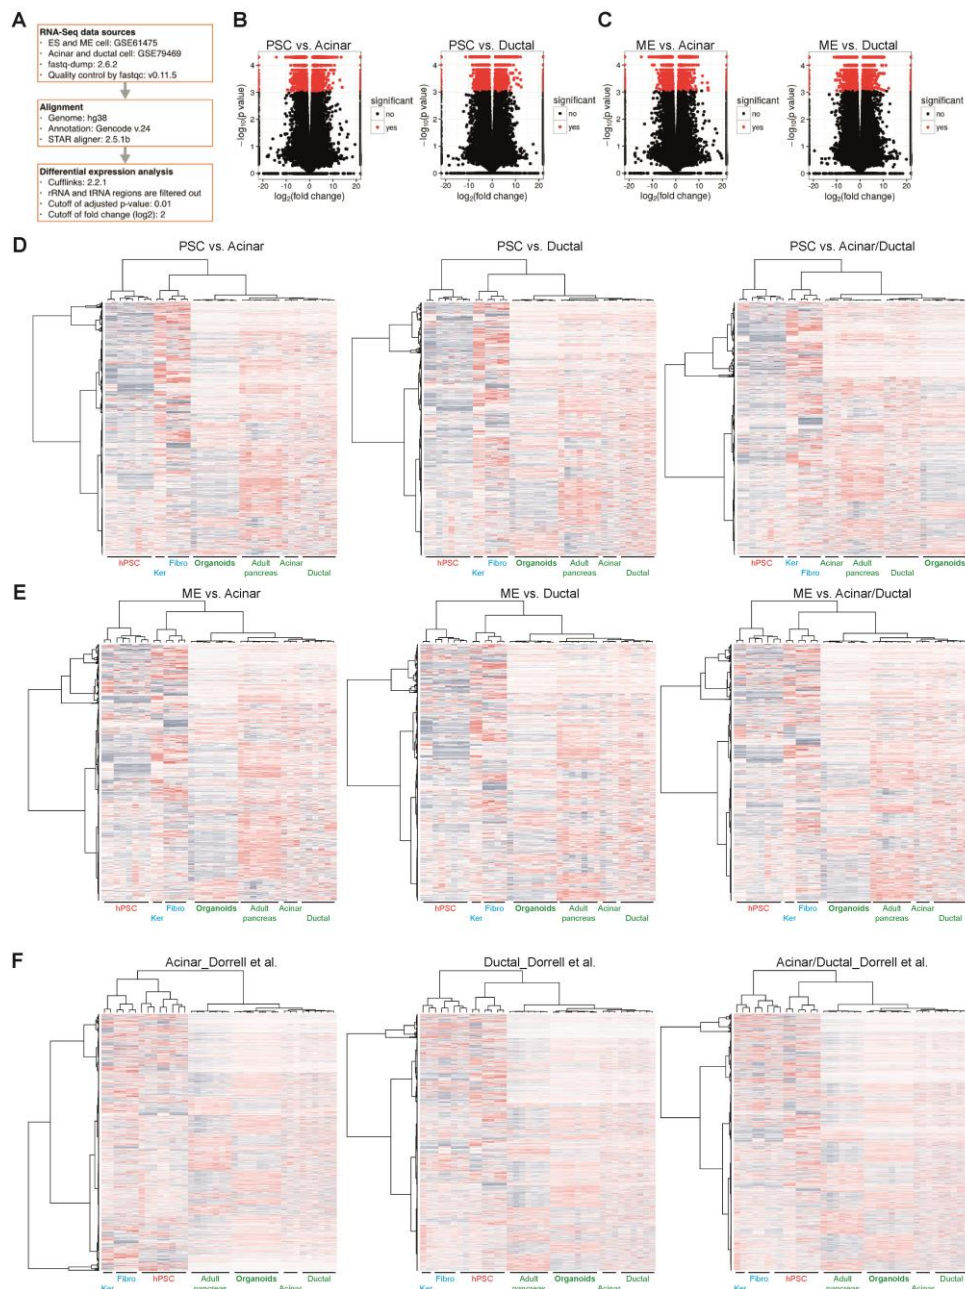

**Supplementary Figure S7. Differentiation of CF-mutated iPSCs towards definitive endoderm (DE).**

**(A)** FACS analysis for CXCR4 and c-KIT of the indicated genotypes at day 4 of differentiation (DE). **(B)** Immunostaining for SOX17 at day 4 of differentiation (DE) of the indicated genotypes. **(C)** Immunostaining for FOXA2 at day 4 of differentiation (DE) of the indicated genotypes. Scale bars: 100  $\mu$ m.

**Supplementary Figure 7**

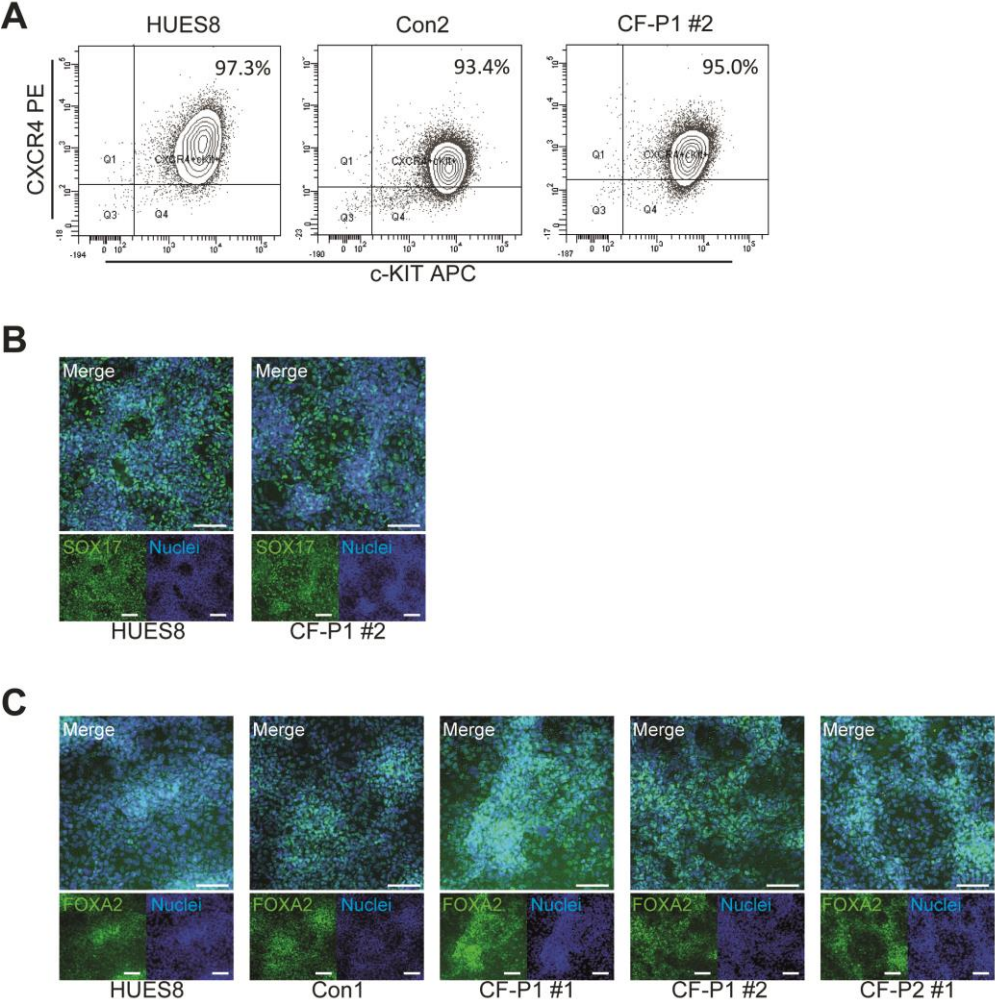

**Supplementary Figure S8. Differentiation of CF-mutated iPSCs towards pancreatic endoderm (PE) and –progenitors (PP).** (A) FACS analysis for PDX1 of the indicated genotypes at day 10 of differentiation (PE). (B) FACS analysis for PDX1 and NKX6.1 of the indicated genotypes at day 14 of differentiation (PP). (C) mRNA expression of pancreatic progenitor cell, proliferation (CYCLIN D1/D2), ER-stress (XBP1) and apoptosis (CASP3) markers in PPs derived from two wildtype (HUES8, Con) and two CFTR-mutated (CF-P1, -P2) PSC lines. Note that CFTR expression level in CF-P1 is significantly lower as expected based on the present CFTR mutation causing mRNA degradation. Target mRNA expression relative to *HMBS* is depicted as mean  $\pm$ SEM (n=3) at a log10 scale.

### Supplementary Figure 8

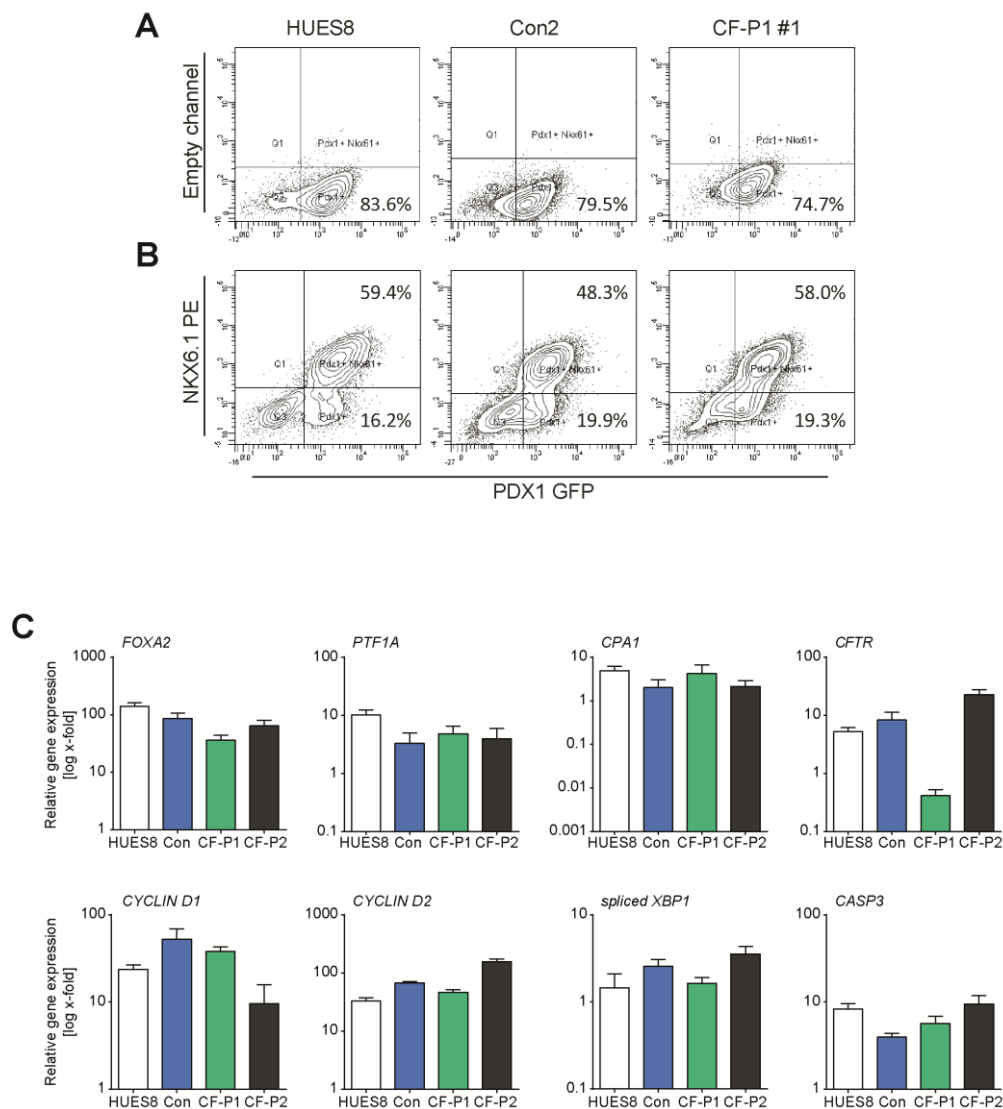

**Supplementary Figure S9.** (A) Morphology of POs from indicated genotypes in the two applied differentiation media (FN and FEPC). Scale bar: 50  $\mu\text{m}$ . (B) qPCR analysis of wildtype and CF pancreatic organoid cultures at day 18 of differentiation. Values represent mean mRNA expression relative to *HMBS* of two WT (HUES8, Con) and two CF (CF-P1 #1/#2) PSC lines, respectively, each analysed in duplicates. Strong downregulation of *CFTR* expression in CF-P1 results from mRNA instability due to the premature termination codon. (C,D) Immunostaining of pancreatic organoids generated from CF-patient (CF-P1, C) and control iPS (Con, D) cells for the indicated markers. ECADH: E-cadherin, LAM: laminin- $\alpha$ 5, CASP3: cleaved caspase 3, CTRC: chymotrypsin C, AMY: amylase. Scale bars: 20  $\mu\text{m}$ .

## Supplementary Figure 9

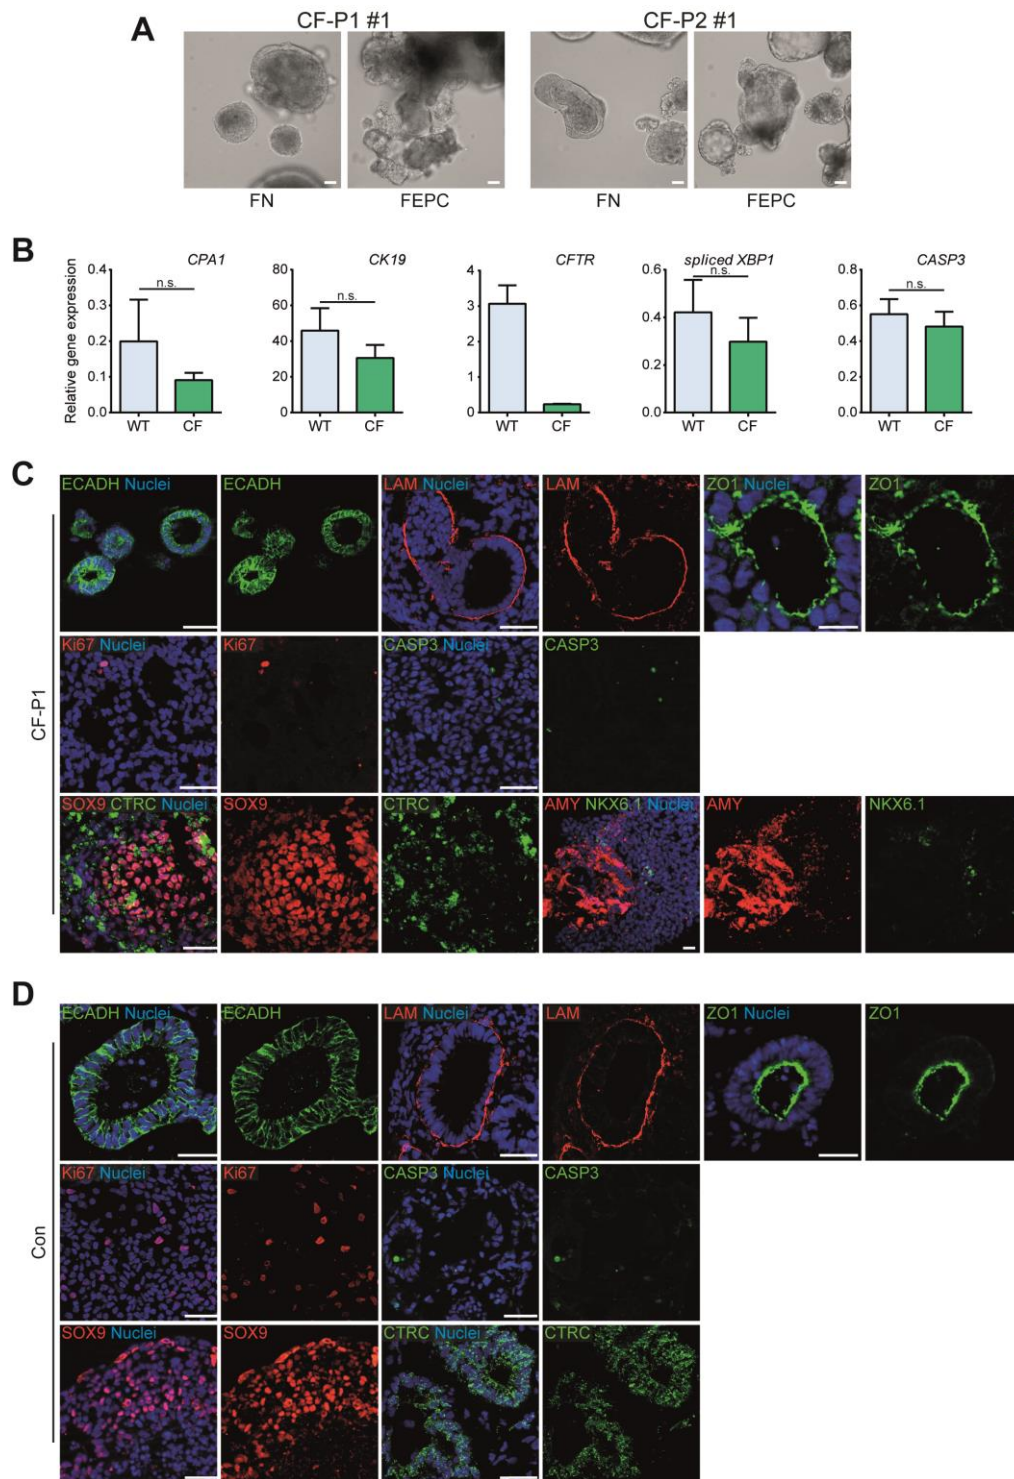



**Supplementary Figure S10 (A-C)** Immunostainings for the indicated markers of pancreatic grafts retrieved 5 weeks after orthotopic transplantation of WT- and CF-organoids into mouse pancreas. **(A)** Expression of acinar-specific marker chymotrypsin C (CTRC). **(B)** NKX6.1 expression is predominantly found in SOX9-negative cells (arrowheads). **(C)** Apoptotic cells marked by cleaved caspase 3 (CASP3) are only rarely detected (arrowhead). Scale bar: **(A,C)** 40  $\mu\text{m}$ , **(B)** 20  $\mu\text{m}$ .

## Supplementary Figure 10

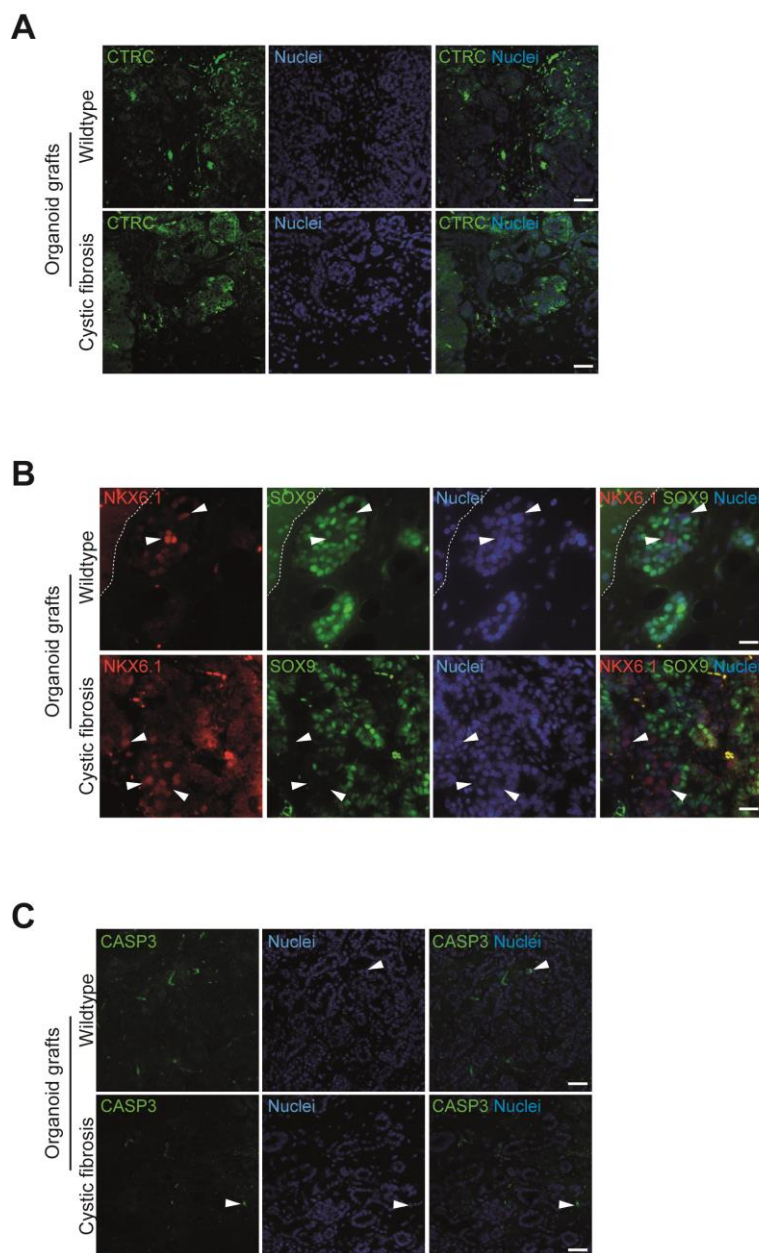

## Supplementary Literature

1. Sanz J, von Kanel T, Schneider M, et al. The CFTR frameshift mutation 3905insT and its effect at transcript and protein level. *Eur J Hum Genet* 2010;**18**(2):212-7.
2. Lebofsky R, Decraene C, Bernard V, et al. Circulating tumor DNA as a non-invasive substitute to metastasis biopsy for tumor genotyping and personalized medicine in a prospective trial across all tumor types. *Mol Oncol* 2015;**9**(4):783-90.
3. Linta L, Stockmann M, Kleinhans KN, et al. Rat embryonic fibroblasts improve reprogramming of human keratinocytes into induced pluripotent stem cells. *Stem Cells Dev* 2012;**21**(6):965-76.
4. Illing A, Stockmann M, Swamy Telugu N, et al. Definitive Endoderm Formation from Plucked Human Hair-Derived Induced Pluripotent Stem Cells and SK Channel Regulation. *Stem Cells Int* 2013;**2013**:360573.
5. Frank S, Zhang M, Scholer HR, et al. Small molecule-assisted, line-independent maintenance of human pluripotent stem cells in defined conditions. *PLoS one* 2012;**7**(7):e41958.
6. Brion LP, Schwartz JH, Zavilowitz BJ, et al. Micro-method for the measurement of carbonic anhydrase activity in cellular homogenates. *Anal Biochem* 1988;**175**(1):289-97.
7. Muller M, Schroer J, Azoitei N, et al. A time frame permissive for Protein Kinase D2 activity to direct angiogenesis in mouse embryonic stem cells. *Scientific reports* 2015;**5**:11742.
8. Russell R, Perkhof L, Liebau S, et al. Loss of ATM accelerates pancreatic cancer formation and epithelial-mesenchymal transition. *Nature communications* 2015;**6**:7677.
9. Wettenhall JM, Smyth GK. limmaGUI: a graphical user interface for linear modeling of microarray data. *Bioinformatics* 2004;**20**(18):3705-6.
10. Dorrell C, Schug J, Lin CF, et al. Transcriptomes of the major human pancreatic cell types. *Diabetologia* 2011;**54**(11):2832-44.
11. Subramanian A, Tamayo P, Mootha VK, et al. Gene set enrichment analysis: a knowledge-based approach for interpreting genome-wide expression profiles. *Proc Natl Acad Sci U S A* 2005;**102**(43):15545-50.
12. Tsankov AM, Gu H, Akopian V, et al. Transcription factor binding dynamics during human ES cell differentiation. *Nature* 2015;**518**(7539):344-9.
13. Arda HE, Li L, Tsai J, et al. Age-Dependent Pancreatic Gene Regulation Reveals Mechanisms Governing Human beta Cell Function. *Cell Metab* 2016;**23**(5):909-20.
14. Kodama Y, Shumway M, Leinonen R, et al. The Sequence Read Archive: explosive growth of sequencing data. *Nucleic Acids Res* 2012;**40**(Database issue):D54-6.
15. S A. FastQC: a quality control tool for high throughput sequence data. Available online at: <http://www.bioinformatics.babraham.ac.uk/projects/fastqc>. 2010.
16. Trapnell C, Roberts A, Goff L, et al. Differential gene and transcript expression analysis of RNA-seq experiments with TopHat and Cufflinks. *Nature protocols* 2012;**7**(3):562-78.
17. Nostro MC, Sarangi F, Yang C, et al. Efficient generation of NKX6-1+ pancreatic progenitors from multiple human pluripotent stem cell lines. *Stem Cell Reports* 2015;**4**(4):591-604.
18. Kormann MS, Hasenpusch G, Aneja MK, et al. Expression of therapeutic proteins after delivery of chemically modified mRNA in mice. *Nat Biotechnol* 2011;**29**(2):154-7.
19. Chetty S, Pagliuca FW, Honore C, et al. A simple tool to improve pluripotent stem cell differentiation. *Nat Methods* 2013;**10**(6):553-6.
20. Cuny GD, Yu PB, Laha JK, et al. Structure-activity relationship study of bone morphogenetic protein (BMP) signaling inhibitors. *Bioorg Med Chem Lett* 2008;**18**(15):4388-92.
21. Boergermann JH, Kopf J, Yu PB, et al. Dorsomorphin and LDN-193189 inhibit BMP-mediated Smad, p38 and Akt signalling in C2C12 cells. *Int J Biochem Cell Biol* 2010;**42**(11):1802-7.
22. Stanton BZ, Peng LF. Small-molecule modulators of the Sonic Hedgehog signaling pathway. *Molecular bioSystems* 2010;**6**(1):44-54.
23. Stoffers DA, Zinkin NT, Stanojevic V, et al. Pancreatic agenesis attributable to a single nucleotide deletion in the human IPF1 gene coding sequence. *Nat Genet* 1997;**15**(1):106-10.

24. Offield MF, Jetton TL, Labosky PA, et al. PDX-1 is required for pancreatic outgrowth and differentiation of the rostral duodenum. *Development* 1996;**122**(3):983-95.
25. Sellick GS, Barker KT, Stolte-Dijkstra I, et al. Mutations in PTF1A cause pancreatic and cerebellar agenesis. *Nat Genet* 2004;**36**(12):1301-5.
26. Beres TM, Masui T, Swift GH, et al. PTF1 is an organ-specific and Notch-independent basic helix-loop-helix complex containing the mammalian Suppressor of Hairless (RBP-J) or its paralogue, RBP-L. *Mol Cell Biol* 2006;**26**(1):117-30.
27. Shirasawa S, Yoshie S, Yue F, et al. Pancreatic exocrine enzyme-producing cell differentiation via embryoid bodies from human embryonic stem cells. *Biochem Biophys Res Commun* 2011;**410**(3):608-13.
28. Tulpule A, Kelley JM, Lensch MW, et al. Pluripotent stem cell models of Shwachman-Diamond syndrome reveal a common mechanism for pancreatic and hematopoietic dysfunction. *Cell stem cell* 2013;**12**(6):727-36.
29. Ye F, Duvillie B, Scharfmann R. Fibroblast growth factors 7 and 10 are expressed in the human embryonic pancreatic mesenchyme and promote the proliferation of embryonic pancreatic epithelial cells. *Diabetologia* 2005;**48**(2):277-81.
30. Bhushan A, Itoh N, Kato S, et al. Fgf10 is essential for maintaining the proliferative capacity of epithelial progenitor cells during early pancreatic organogenesis. *Development* 2001;**128**(24):5109-17.
31. Hart A, Papadopoulou S, Edlund H. Fgf10 maintains notch activation, stimulates proliferation, and blocks differentiation of pancreatic epithelial cells. *Dev Dyn* 2003;**228**(2):185-93.
32. Chen S, Borowiak M, Fox JL, et al. A small molecule that directs differentiation of human ESCs into the pancreatic lineage. *Nat Chem Biol* 2009;**5**(4):258-65.
33. Jiang W, Shi Y, Zhao D, et al. In vitro derivation of functional insulin-producing cells from human embryonic stem cells. *Cell Res* 2007;**17**(4):333-44.
34. Otonkoski T, Beattie GM, Mally MI, et al. Nicotinamide is a potent inducer of endocrine differentiation in cultured human fetal pancreatic cells. *J Clin Invest* 1993;**92**(3):1459-66.
35. Rezanian A, Bruin JE, Riedel MJ, et al. Maturation of human embryonic stem cell-derived pancreatic progenitors into functional islets capable of treating pre-existing diabetes in mice. *Diabetes* 2012;**61**(8):2016-29.
36. Loh KM, Ang LT, Zhang J, et al. Efficient endoderm induction from human pluripotent stem cells by logically directing signals controlling lineage bifurcations. *Cell stem cell* 2014;**14**(2):237-52.
37. Wandzioch E, Zaret KS. Dynamic signaling network for the specification of embryonic pancreas and liver progenitors. *Science* 2009;**324**(5935):1707-10.
38. Ahnfelt-Ronne J, Ravassard P, Pardanaud-Glavieux C, et al. Mesenchymal bone morphogenetic protein signaling is required for normal pancreas development. *Diabetes* 2010;**59**(8):1948-56.
39. Cleveland MH, Sawyer JM, Afelik S, et al. Exocrine ontogenies: on the development of pancreatic acinar, ductal and centroacinar cells. *Semin Cell Dev Biol* 2012;**23**(6):711-9.
40. Miralles F, Czernichow P, Scharfmann R. Follistatin regulates the relative proportions of endocrine versus exocrine tissue during pancreatic development. *Development* 1998;**125**(6):1017-24.
41. Maldonado TS, Kadison AS, Crisera CA, et al. Ontogeny of activin B and follistatin in developing embryonic mouse pancreas: implications for lineage selection. *J Gastrointest Surg* 2000;**4**(3):269-75.
42. Esni F, Ghosh B, Biankin AV, et al. Notch inhibits Ptf1 function and acinar cell differentiation in developing mouse and zebrafish pancreas. *Development* 2004;**131**(17):4213-24.
43. Afelik S, Jensen J. Notch signaling in the pancreas: patterning and cell fate specification. *Wiley interdisciplinary reviews Developmental biology* 2013;**2**(4):531-44.
44. Takizawa-Shirasawa S, Yoshie S, Yue F, et al. FGF7 and cell density are required for final differentiation of pancreatic amylase-positive cells from human ES cells. *Cell Tissue Res* 2013;**354**(3):751-9.



45. Borowiak M, Maehr R, Chen S, et al. Small molecules efficiently direct endodermal differentiation of mouse and human embryonic stem cells. *Cell stem cell* 2009;**4**(4):348-58.
46. Loo TW, Bartlett MC, Wang Y, et al. The chemical chaperone CFcor-325 repairs folding defects in the transmembrane domains of CFTR-processing mutants. *Biochem J* 2006;**395**(3):537-42.
47. Dekkers JF, Wiegerinck CL, de Jonge HR, et al. A functional CFTR assay using primary cystic fibrosis intestinal organoids. *Nat Med* 2013;**19**(7):939-45.
48. Okiyoneda T, Veit G, Dekkers JF, et al. Mechanism-based corrector combination restores DeltaF508-CFTR folding and function. *Nat Chem Biol* 2013;**9**(7):444-54.
49. Pedemonte N, Lukacs GL, Du K, et al. Small-molecule correctors of defective DeltaF508-CFTR cellular processing identified by high-throughput screening. *J Clin Invest* 2005;**115**(9):2564-71.
50. Amaral MD, Farinha CM. Rescuing mutant CFTR: a multi-task approach to a better outcome in treating cystic fibrosis. *Curr Pharm Des* 2013;**19**(19):3497-508.
51. Yoo CL, Yu GJ, Yang B, et al. 4'-Methyl-4,5'-bithiazole-based correctors of defective delta F508-CFTR cellular processing. *Bioorg Med Chem Lett* 2008;**18**(8):2610-4.
52. Wong AP, Bear CE, Chin S, et al. Directed differentiation of human pluripotent stem cells into mature airway epithelia expressing functional CFTR protein. *Nat Biotechnol* 2012;**30**(9):876-82.
53. Van Goor F, Straley KS, Cao D, et al. Rescue of DeltaF508-CFTR trafficking and gating in human cystic fibrosis airway primary cultures by small molecules. *Am J Physiol Lung Cell Mol Physiol* 2006;**290**(6):L1117-30.
54. Veit G, Avramescu RG, Perdomo D, et al. Some gating potentiators, including VX-770, diminish DeltaF508-CFTR functional expression. *Sci Transl Med* 2014;**6**(246):246ra97.
55. Wang Y, Liu J, Loizidou A, et al. CFTR potentiators partially restore channel function to A561E-CFTR, a cystic fibrosis mutant with a similar mechanism of dysfunction as F508del-CFTR. *Br J Pharmacol* 2014;**171**(19):4490-503.

## Supplementary Tables

**Supplementary Table 1. Panel of CFTR Correctors and Potentiators tested**

| <b>ID</b>  | <b>Chemical name</b>                                                                                                     | <b>Other name</b> | <b>Reference</b> |
|------------|--------------------------------------------------------------------------------------------------------------------------|-------------------|------------------|
| <b>C3</b>  | 4-Cyclohexyloxy-2-{1-[4-(4-methoxy-benzensulfonyl)-piperazin-1-yl]-ethyl}-quinazoline                                    | VRT-325           | 46-48            |
| <b>C4</b>  | N-[2-(5-Chloro-2-methoxy-phenylamino)-4'-methyl-[4,5']bithiazolyl-2'-yl]-benzamide                                       | Corr-4a           | 47-49            |
| <b>C8</b>  | N-(2-fluorophenyl)-2-(1H-indol-3-yl)-2-oxoacetamide                                                                      |                   | 47               |
| <b>C17</b> | N-(2-(5-chloro-2-methoxyphenylamino)-4'-methyl-4,5'-bithiazol-2'-yl)pivalamide                                           | 15Jf              | 50 51            |
| <b>C18</b> | 1-(benzo[d][1,3]dioxol-5-yl)-N-(5-((2-chlorophenyl)(3-hydroxypyrrolidin-1-yl)methyl)thiazol-2-yl)cyclopropanecarboxamide | VRT-534           | 48 52            |
| <b>P1</b>  | 4-Methyl-2-(5-phenyl-1H-pyrazol-3-yl)-phenol                                                                             | VRT-532           | 50 53 54         |
| <b>P4</b>  | 1-(3-chlorophenyl)-5-trifluoromethyl-3-hydrobenzimidazol-2-one                                                           | UCCF-853          | 54 55            |
| <b>P9</b>  | 3-But-3-ynyl-5-methoxy-1-phenyl-1H-pyrazole-4-carbaldehyde                                                               |                   | 55               |

Provided by Cystic Fibrosis Foundation Therapeutics, Inc. (CFFT)

**Supplementary Table 2. Antibodies applied for flow cytometry and for immunostainings (on cells and organoid cryo/paraffin sections)**

| <b>Antigen</b>      | <b>Species</b> | <b>Cat. Nr.</b> | <b>Company</b> | <b>Dilution</b> |
|---------------------|----------------|-----------------|----------------|-----------------|
| OCT4                | mouse          | sc-5279         | Santa Cruz     | 1:200           |
| NANOG               | rabbit         | 3580            | Cell Signaling | 1:500           |
| SSEA4 (MC813)       | mouse          | 4755            | Cell Signaling | 1:500           |
| c-KIT-APC (CD117)   | mouse          | CD11705         | Invitrogen     | 1:100           |
| CXCR4-PE (CD184)    | mouse          | MHCXR404        | Invitrogen     | 1:50            |
| SOX17               | goat           | AF1924          | R&D, USA       | 1:500           |
| FOXA2               | goat           | sc-6554         | Santa Cruz     | 1:500           |
| PDX1                | goat           | AF2419          | R&D            | 1:500           |
| NKX6.1              | mouse          | F55A12          | Iowa Hybridoma | 1:50            |
| SOX9                | rabbit         | AB5535          | Millipore      | 1:800           |
| Chymotrypsin        | mouse          | MAB1476         | Millipore      | 1:1000          |
| E-Cadherin          | mouse          | 610182          | BD Bioscience  | 1:1000          |
| $\alpha$ -Amylase   | rabbit         | A8273           | Sigma          | 1:500           |
| Cytokeratin 19      | mouse          | Ab7755          | abcam          | 1:2000          |
| CFTR                | mouse          | MAB1660         | R&D            | 1:100           |
| ZO-1, clone R40.76  | rat            | MABT11          | Millipore      | 1:50            |
| Laminin- $\alpha$ 5 | mouse          | Ab77175         | Abcam          | 1:100           |
| Cleaved caspase 3   | rabbit         | 9579            | Cell Signaling | 1:100           |

**Supplementary Table 3. Antibodies applied for IHC and IF of grafts (if divergent from Table 2)**

| <b>Antigen</b>                | <b>Species</b> | <b>Cat. Nr.</b> | <b>Company</b> | <b>Dilution</b> |
|-------------------------------|----------------|-----------------|----------------|-----------------|
| Human Cytokeratin 8           | mouse          | 345779          | BD Bioscience  | 1:100           |
| $\alpha$ -Amylase             | rabbit         | A8273           | Sigma          | 1:1000          |
| Cytokeratin 19                | mouse          | Ab7755          | abcam          | 1:100           |
| Insulin                       | rabbit         | 11187           | ICN/Cappel     | 1:200           |
| Human Ki67                    | mouse          | M7240           | Dako           | 1:100           |
| $\alpha$ -smooth muscle actin | rabbit         | AB5694          | Biozol         | 1:400           |
| SOX9                          | rabbit         | AB5535          | Millipore      | 1:2000          |
| Carboxypeptidase A1           | rabbit         | AHP2054         | AbD Serotec    | 1:200           |
| CFTR                          | rabbit         | sc-10747        | Santa Cruz     | 1:100           |

**Supplementary Table 4. List of genes constituting in-house generated or public available acinar or ductal-related gene sets**

| PSC vs Acinar | PSC vs Ductal | PSC vs Acinar_Ductal | ME vs Acinar | ME vs Ductal | ME vs Acinar_Ductal | Acinar Dorrel et al. | Ductal Dorrell et al. | Acinar_Ductal Dorrel et al. |
|---------------|---------------|----------------------|--------------|--------------|---------------------|----------------------|-----------------------|-----------------------------|
| A1CF          | A1CF          | A1CF                 | A1CF         | A1CF         | A1CF                | A1BG                 | A1BG                  | A1BG                        |
| AAK1          | ABCA5         | AAK1                 | AAK1         | ABCA5        | AAK1                | AAK1                 | A1CF                  | A1CF                        |
| ABCA5         | ABCB1         | ABCA5                | ABCA5        | ABCB1        | ABCA5               | AASDHPPT             | AASDH                 | AAK1                        |
| ABCA9         | ABHD2         | ABCA9                | ABCA9        | ABHD2        | ABCA9               | ABCA5                | AASDHPPT              | AASDH                       |
| ABHD1         | ABHD4         | ABCB1                | ABCC9        | ABHD4        | ABCB1               | ABCB1                | ABCA5                 | AASDHPPT                    |
| ABHD14B       | ABHD5         | ABHD1                | ABHD14B      | ABLIM2       | ABCC9               | ABCB10               | ABCB1                 | ABCA5                       |
| ABHD2         | ABI3BP        | ABHD14B              | ABHD2        | ABTB2        | ABHD14B             | ABCC5                | ABCB10                | ABCB1                       |
| ABHD5         | ABL2          | ABHD2                | ABI3BP       | ACSS1        | ABHD2               | ABCC9                | ABCB8                 | ABCB10                      |
| ABI3BP        | ABTB2         | ABHD4                | ABLIM2       | ACVR2A       | ABHD4               | ABCF1                | ABCC3                 | ABCB8                       |
| ACBD5         | ACBD5         | ABHD5                | ACCS         | ACY3         | ABI3BP              | ABCG1                | ABCC4                 | ABCC3                       |
| ACCS          | ACE           | ABI3BP               | ACOX1        | ADAM28       | ABLIM2              | ABHD10               | ABCC5                 | ABCC4                       |
| ACOX1         | ACPP          | ABL2                 | ACSS1        | ADAMTS16     | ABTB2               | ABHD13               | ABCC9                 | ABCC5                       |
| ACRC          | ACRC          | ABTB2                | ACY3         | ADCY5        | ACCS                | ABHD5                | ABCF1                 | ABCC9                       |
| ACSS1         | ACSL5         | ACBD5                | ADAT2        | AFF4         | ACOX1               | ABI2                 | ABCG1                 | ABCF1                       |
| ADAMTS9       | ACSS1         | ACCS                 | ADHFE1       | AFTPH        | ACSS1               | ABI3BP               | ABHD1                 | ABCG1                       |
| ADAMTSL4      | ACVR2A        | ACE                  | ADPRH        | AGR3         | ACVR2A              | ABLIM2               | ABHD10                | ABHD1                       |
| ADAP2         | ADAM28        | ACOX1                | ADPRHL1      | AHI1         | ACY3                | ABTB1                | ABHD12                | ABHD10                      |
| ADAT2         | ADAMTS1       | ACPP                 | AFF4         | AIFM2        | ADAM28              | ACAA2                | ABHD13                | ABHD12                      |
| ADCY4         | ADAMTS9       | ACRC                 | AFTPH        | AKAP13       | ADAMTS16            | ACAD10               | ABHD14B               | ABHD13                      |
| ADHFE1        | ADCY4         | ACSL5                | AGR3         | ALPK1        | ADAT2               | ACAD9                | ABHD2                 | ABHD14B                     |
| ADPRH         | ADCY5         | ACSS1                | AHI1         | ALS2CL       | ADCY5               | ACADSB               | ABHD4                 | ABHD2                       |
| ADPRHL1       | ADHFE1        | ACVR2A               | AKAP13       | ANGPTL1      | ADHFE1              | ACMSD                | ABHD5                 | ABHD4                       |
| AFAP1L2       | AFF4          | ADAM28               | ALDH1L2      | ANKHD1       | ADPRH               | ACO1                 | ABI2                  | ABHD5                       |
| AFF4          | AFTPH         | ADAMTS1              | ALG2         | ANKRD13A     | ADPRHL1             | ACOX1                | ABI3BP                | ABI2                        |
| AFTPH         | AGPAT3        | ADAMTS9              | ALPK1        | ANKRD18A     | AFF4                | ACPP                 | ABL2                  | ABI3BP                      |
| AGPAT3        | AHI1          | ADAMTSL4             | AMIGO1       | ANKRD28      | AFTPH               | ACRC                 | ABLIM2                | ABL2                        |
| AHI1          | AHNAK         | ADAP2                | ANKH         | ANKRD36      | AGR3                | ACSL6                | ACAA2                 | ABLIM2                      |
| AHNAK         | AKAP13        | ADAT2                | ANKHD1       | ANO9         | AHI1                | ACSS2                | ACAD9                 | ABTB1                       |
| AKAP13        | AKT3          | ADCY4                | ANKRD18A     | ANPEP        | AIFM2               | ACTB                 | ACADSB                | ACAA2                       |
| ALDH1L2       | ALS2CL        | ADCY5                | ANKRD22      | ANXA11       | AKAP13              | ACTG2                | ACE                   | ACAD10                      |
| ALG2          | ANGPTL1       | ADHFE1               | ANKRD36      | AP1G1        | ALDH1L2             | ACTR2                | ACMSD                 | ACAD9                       |
| ALPK1         | ANKRD13A      | ADPRH                | ANKRD37      | AP1S3        | ALG2                | ACTR6                | ACO1                  | ACADSB                      |
| ALPK3         | ANKRD28       | ADPRHL1              | ANKRD53      | APCDD1       | ALPK1               | ACTR8                | ACOX1                 | ACE                         |
| ALS2CL        | ANKRD36       | AFAP1L2              | ANO9         | APOBEC3F     | ALS2CL              | ACVR2B               | ACP6                  | ACMSD                       |

|          |          |          |          |          |          |          |          |          |
|----------|----------|----------|----------|----------|----------|----------|----------|----------|
| AMDHD1   | ANKRD44  | AFF4     | ANPEP    | APOH     | AMIGO1   | ACVRL1   | ACPP     | ACO1     |
| AMIGO1   | ANO6     | AFTPH    | AP1G1    | APOOL    | ANGPTL1  | ACY3     | ACRC     | ACOX1    |
| ANGEL1   | ANO9     | AGPAT3   | AP1S3    | ARFGEF2  | ANKH     | ADAL     | ACSL5    | ACP6     |
| ANKH     | ANPEP    | AHI1     | APOH     | ARHGAP21 | ANKHD1   | ADAM22   | ACSL6    | ACPP     |
| ANKRD18A | ANXA11   | AHNAK    | APOOL    | ARHGAP24 | ANKRD13A | ADAMTS12 | ACSS1    | ACRC     |
| ANKRD36  | AP1G1    | AKAP13   | APPL1    | ARHGAP26 | ANKRD18A | ADAMTS16 | ACSS3    | ACSL5    |
| ANKRD37  | AP1S3    | AKT3     | ARFGEF2  | ARHGAP27 | ANKRD22  | ADAMTS18 | ACTB     | ACSL6    |
| ANKRD44  | APCDD1   | ALDH1L2  | ARHGAP18 | ARHGAP30 | ANKRD28  | ADAMTS2  | ACTR2    | ACSS1    |
| ANKRD53  | APOBEC3F | ALG2     | ARHGAP21 | ARHGAP5  | ANKRD36  | ADAMTS5  | ACTR6    | ACSS2    |
| ANO9     | APOH     | ALPK1    | ARHGAP24 | ARHGEF12 | ANKRD37  | ADAMTS9  | ACVR2B   | ACSS3    |
| ANPEP    | APOL6    | ALPK3    | ARHGAP26 | ARHGEF5  | ANKRD53  | ADAMTSL1 | ACVRL1   | ACTB     |
| ANXA11   | APOOL    | ALS2CL   | ARHGAP30 | ARID5B   | ANO9     | ADAMTSL4 | ADAL     | ACTG2    |
| AP1G1    | ARFGEF2  | AMDHD1   | ARHGAP5  | ARNTL2   | ANPEP    | ADAMTSL5 | ADAM22   | ACTR2    |
| APOH     | ARG1     | AMIGO1   | ARID4A   | ARRDC3   | ANXA11   | ADARB1   | ADAM28   | ACTR6    |
| APOL6    | ARHGAP18 | ANGEL1   | ARRDC3   | ARSD     | AP1G1    | ADARB2   | ADAM33   | ACTR8    |
| APOOL    | ARHGAP21 | ANGPTL1  | ARRDC4   | ASB2     | AP1S3    | ADAT2    | ADAMTS1  | ACVR2B   |
| APPL1    | ARHGAP24 | ANKH     | ARSD     | ASH1L    | APCDD1   | ADCY1    | ADAMTS12 | ACVRL1   |
| ARF1     | ARHGAP26 | ANKRD13A | ASB8     | ASPH     | APOBEC3F | ADCYAP1  | ADAMTS16 | ACY3     |
| ARFGEF2  | ARHGAP27 | ANKRD18A | ASH1L    | ATF7IP2  | APOH     | ADD1     | ADAMTS18 | ADAL     |
| ARHGAP18 | ARHGAP30 | ANKRD28  | ASPH     | ATG2B    | APOOL    | ADD2     | ADAMTS2  | ADAM22   |
| ARHGAP21 | ARHGAP5  | ANKRD36  | ATF7IP2  | ATP11B   | APPL1    | ADHFE1   | ADAMTS5  | ADAM28   |
| ARHGAP24 | ARHGEF12 | ANKRD37  | ATG2B    | ATP13A4  | ARFGEF2  | ADNP     | ADAMTS7  | ADAM33   |
| ARHGAP26 | ARID4A   | ANKRD44  | ATP11B   | ATP2C2   | ARHGAP18 | ADRBK2   | ADAMTS9  | ADAMTS1  |
| ARHGAP30 | ARID4B   | ANKRD53  | ATP2A3   | ATP5S    | ARHGAP21 | AEBP2    | ADAMTSL1 | ADAMTS12 |
| ARHGAP5  | ARID5B   | ANO6     | ATP8B1   | ATP8B1   | ARHGAP24 | AFAP1L1  | ADAMTSL4 | ADAMTS16 |
| ARHGEF12 | ARRDC3   | ANO9     | ATP9B    | ATR      | ARHGAP26 | AFF4     | ADAMTSL5 | ADAMTS18 |
| ARID4A   | ARSD     | ANPEP    | ATXN1    | ATXN1    | ARHGAP27 | AFG3L2   | ADARB1   | ADAMTS2  |
| ARID5B   | ASB2     | ANXA11   | ATXN7    | ATXN7    | ARHGAP30 | AFMID    | ADAT2    | ADAMTS5  |
| ARMC3    | ASB8     | AP1G1    | B3GALNT2 | B3GALT5  | ARHGAP5  | AFTPH    | ADCK5    | ADAMTS7  |
| ARRDC3   | ASH1L    | AP1S3    | B3GNT5   | B3GNT5   | ARHGEF12 | AGPAT4   | ADCY1    | ADAMTS9  |
| ARRDC4   | ASPH     | APCDD1   | B3GNT7   | B3GNT7   | ARHGEF5  | AGPAT5   | ADCY5    | ADAMTSL1 |
| ARSD     | ATAD1    | APOBEC3F | BACE1    | B4GALT1  | ARID4A   | AGPAT9   | ADCYAP1  | ADAMTSL4 |
| ASB8     | ATF6     | APOH     | BACE2    | BACE2    | ARID5B   | AGTRAP   | ADD1     | ADAMTSL5 |
| ASH1L    | ATF7IP2  | APOL6    | BACH1    | BCL2L11  | ARNTL2   | AHCTF1   | ADD2     | ADARB1   |
| ASPH     | ATG2B    | APOOL    | BAG1     | BCL2L14  | ARRDC3   | AHI1     | ADHFE1   | ADARB2   |
| ATAD2B   | ATP11A   | APPL1    | BANF2    | BCL2L15  | ARRDC4   | AHNAK    | ADI1     | ADAT2    |
| ATF6     | ATP11B   | ARF1     | BATF2    | BCL6     | ARSD     | AHRR     | ADNP     | ADCK5    |
| ATF7     | ATP2C2   | ARFGEF2  | BCL2L11  | BCO2     | ASB2     | AIFM2    | ADPRHL1  | ADCY1    |
| ATF7IP2  | ATP8B1   | ARG1     | BCL2L14  | BCOR     | ASB8     | AIG1     | ADRBK2   | ADCY5    |

|          |         |          |         |          |          |          |          |         |
|----------|---------|----------|---------|----------|----------|----------|----------|---------|
| ATG2B    | ATXN1   | ARHGAP18 | BCL2L15 | BDP1     | ASH1L    | AK7      | AEBP2    | ADCYAP1 |
| ATG7     | ATXN7   | ARHGAP21 | BCL6    | BEND7    | ASPH     | AKAP12   | AFAP1L1  | ADD1    |
| ATP11B   | AVIL    | ARHGAP24 | BCOR    | BEX2     | ATF7IP2  | AKAP13   | AFAP1L2  | ADD2    |
| ATP8B1   | B2M     | ARHGAP26 | BDP1    | BEX5     | ATG2B    | AKAP8L   | AFF4     | ADHFE1  |
| ATXN1    | B3GNT5  | ARHGAP27 | BEND7   | BHMT2    | ATP11B   | AKNA     | AFG3L2   | ADI1    |
| ATXN7    | B4GALT1 | ARHGAP30 | BEX5    | BIRC3    | ATP13A4  | AKT2     | AFTPH    | ADNP    |
| AVIL     | BACE2   | ARHGAP5  | BHMT2   | BIRC6    | ATP2A3   | AKT3     | AGBL5    | ADPRHL1 |
| B2M      | BACH2   | ARHGEF12 | BIRC3   | BMPR1B   | ATP2C2   | AKTIP    | AGPAT3   | ADRBK2  |
| B3GALNT2 | BBS12   | ARID4A   | BIRC6   | BRAF     | ATP5S    | ALDH1L2  | AGPAT4   | AEBP2   |
| B3GNT5   | BBS5    | ARID4B   | BRAF    | BTBD9    | ATP8B1   | ALDOA    | AGPAT5   | AFAP1L1 |
| B4GALT1  | BCL2L11 | ARID5B   | BRI3BP  | CACNA1D  | ATP9B    | ALDOB    | AGPAT9   | AFAP1L2 |
| BACE1    | BCL6    | ARMC3    | BRSK2   | CADPS    | ATR      | ALG2     | AHCTF1   | AFF4    |
| BACE2    | BCO2    | ARRDC3   | BTBD9   | CALN1    | ATXN1    | ALKBH5   | AHI1     | AFG3L2  |
| BACH1    | BDP1    | ARRDC4   | C1RL    | CAMSAP1  | ATXN7    | ALKBH7   | AHNAK    | AFMID   |
| BAIAP2L1 | BEND7   | ARSD     | C2CD4B  | CAPS2    | B3GALNT2 | ALKBH8   | AHRR     | AFTPH   |
| BANF2    | BHMT2   | ASB2     | C7      | CARD6    | B3GALT5  | ALPK1    | AHSA2    | AGBL5   |
| BATF2    | BIRC3   | ASB8     | CA12    | CASC4    | B3GNT5   | ALS2     | AIFM3    | AGPAT3  |
| BCL2L11  | BIRC6   | ASH1L    | CACNA1D | CASZ1    | B3GNT7   | ALS2CL   | AIG1     | AGPAT4  |
| BCL2L14  | BIVM    | ASPH     | CADPS   | CCDC125  | B4GALT1  | AMDHD1   | AK3      | AGPAT5  |
| BCL2L15  | BMP2K   | ATAD1    | CAMK1D  | CCDC146  | BACE1    | AMN1     | AK5      | AGPAT9  |
| BCL6     | BMPR2   | ATAD2B   | CANX    | CCDC17   | BACE2    | AMOTL1   | AKAP12   | AGTRAP  |
| BEND7    | BNIP2   | ATF6     | CARD6   | CCDC47   | BACH1    | ANGPT2   | AKAP13   | AHCTF1  |
| BET1L    | BRAF    | ATF7     | CASC4   | CCDC59   | BAG1     | ANGPTL1  | AKT2     | AHI1    |
| BEX5     | BSPRY   | ATF7IP2  | CASZ1   | CCDC6    | BANF2    | ANGPTL4  | AKT3     | AHNAK   |
| BHMT2    | BTBD9   | ATG2B    | CBLL1   | CCDC64B  | BATF2    | ANGPTL6  | AKTIP    | AHRR    |
| BIRC3    | C1QTNF7 | ATG7     | CBX4    | CCDC84   | BCL2L11  | ANK1     | ALDH18A1 | AHSA2   |
| BIRC6    | CACNA1D | ATP11A   | CCDC112 | CCDC93   | BCL2L14  | ANK3     | ALDH1L2  | AIFM2   |
| BIVM     | CADM1   | ATP11B   | CCDC125 | CCL28    | BCL2L15  | ANKDD1A  | ALDOB    | AIFM3   |
| BMPR2    | CADPS   | ATP2C2   | CCDC149 | CCNL1    | BCL6     | ANKFY1   | ALG2     | AIG1    |
| BRAF     | CAMSAP1 | ATP8B1   | CCDC59  | CCNT1    | BCO2     | ANKH     | ALG5     | AK3     |
| BRSK2    | CAPS2   | ATXN1    | CCDC6   | CCNYL1   | BCOR     | ANKRD11  | ALG9     | AK5     |
| BSPRY    | CARD6   | ATXN7    | CCDC64B | CD274    | BDP1     | ANKRD13A | ALKBH5   | AK7     |
| BTBD9    | CASC4   | AVIL     | CCDC84  | CD2AP    | BEND7    | ANKRD17  | ALPK3    | AKAP12  |
| C1RL     | CASZ1   | B2M      | CCKBR   | CD44     | BEX2     | ANKRD23  | ALS2     | AKAP13  |
| C7       | CBX4    | B3GALNT2 | CCL28   | CD47     | BEX5     | ANKRD24  | ALS2CL   | AKAP8L  |
| CA12     | CCDC146 | B3GNT5   | CCND2   | CDADC1   | BHMT2    | ANKRD28  | AMACR    | AKNA    |
| CAMK1D   | CCDC17  | B4GALT1  | CCNI    | CDC42SE2 | BIRC3    | ANKRD34A | AMDHD1   | AKT2    |
| CANX     | CCDC50  | BACE1    | CCNL1   | CDC73    | BIRC6    | ANKRD35  | AMIGO1   | AKT3    |
| CARD6    | CCDC59  | BACE2    | CCNYL1  | CDCP1    | BMPR1B   | ANKRD37  | AMMECR1L | AKTIP   |

|          |          |          |          |          |         |          |          |          |
|----------|----------|----------|----------|----------|---------|----------|----------|----------|
| CASC4    | CCDC84   | BACH1    | CD274    | CDKL2    | BRAF    | ANKRD53  | AMN1     | ALDH18A1 |
| CASZ1    | CCDC93   | BACH2    | CD2AP    | CDO1     | BRI3BP  | ANKS1B   | AMOTL1   | ALDH1L2  |
| CBX4     | CCL28    | BAIAP2L1 | CD44     | CDS1     | BRSK2   | ANKS6    | ANAPC4   | ALDOA    |
| CCDC125  | CCNL1    | BANF2    | CDADC1   | CEACAM19 | BTBD9   | ANP32E   | ANAPC5   | ALDOB    |
| CCDC126  | CCNT1    | BATF2    | CDC37L1  | CFLAR    | C1RL    | ANPEP    | ANGEL1   | ALG2     |
| CCDC149  | CCNYL1   | BBS12    | CDC42SE2 | CFTR     | C2CD4B  | ANTXR1   | ANGPT2   | ALG5     |
| CCDC50   | CD2AP    | BBS5     | CDCA7L   | CGN      | C7      | ANTXR2   | ANGPTL1  | ALG9     |
| CCDC59   | CD44     | BCL2L11  | CDCP1    | CHD2     | CA12    | ANXA1    | ANK1     | ALKBH5   |
| CCDC6    | CD47     | BCL2L14  | CDS1     | CHD6     | CACNA1D | ANXA11   | ANK3     | ALKBH7   |
| CCDC64B  | CD59     | BCL2L15  | CEACAM19 | CHD9     | CADPS   | AP1G1    | ANKH     | ALKBH8   |
| CCDC84   | CD84     | BCL6     | CFTR     | CHDH     | CALN1   | AP1S2    | ANKHD1   | ALPK1    |
| CCDC93   | CDCP1    | BCO2     | CGN      | CLDN1    | CAMK1D  | AP4B1    | ANKIB1   | ALPK3    |
| CCL28    | CDKL1    | BDP1     | CHD2     | CLDN23   | CAMSAP1 | APBB1IP  | ANKRD10  | ALS2     |
| CCND2    | CDKL2    | BEND7    | CHDH     | CLIC5    | CANX    | APCDD1   | ANKRD11  | ALS2CL   |
| CCNI     | CDKN2B   | BET1L    | CHRM3    | CLIC6    | CAPS2   | APCDD1L  | ANKRD13B | AMACR    |
| CCNL1    | CEACAM19 | BEX5     | CLDN1    | CLINT1   | CARD6   | APEH     | ANKRD13C | AMDHD1   |
| CCNYL1   | CFL2     | BHMT2    | CLDN12   | CLIP1    | CASC4   | APH1A    | ANKRD17  | AMIGO1   |
| CD2AP    | CFLAR    | BIRC3    | CLDN23   | CLIP4    | CASZ1   | APH1B    | ANKRD22  | AMMECR1L |
| CD44     | CFTR     | BIRC6    | CLIP1    | CLMN     | CBLL1   | APLP2    | ANKRD23  | AMN1     |
| CD84     | CHD2     | BIVM     | CLIP4    | CMYA5    | CBX4    | APOBEC3F | ANKRD24  | AMOTL1   |
| CDCP1    | CHD6     | BMP2K    | CLMN     | CNKS3    | CCDC112 | APOH     | ANKRD28  | ANAPC4   |
| CDKL1    | CHD9     | BMPR2    | CMTM8    | CNOT2    | CCDC125 | APOL4    | ANKRD32  | ANAPC5   |
| CDKL2    | CHM      | BNIP2    | CMYA5    | CNOT6L   | CCDC146 | AQP4     | ANKRD34A | ANGEL1   |
| CEACAM19 | CHMP4C   | BRAF     | CNKS3    | CNTN3    | CCDC149 | AR       | ANKRD35  | ANGPT2   |
| CEP120   | CLDN1    | BRSK2    | CNKS3    | COBLL1   | CCDC17  | ARAF     | ANKRD44  | ANGPTL1  |
| CFLAR    | CLDN23   | BSPRY    | CNOT6L   | COMTD1   | CCDC47  | ARF1     | ANKRD52  | ANGPTL4  |
| CFTR     | CLEC16A  | BTBD9    | CNTN3    | CPEB2    | CCDC59  | ARF3     | ANKS6    | ANGPTL6  |
| CHD2     | CLEC2D   | C1QTNF7  | COBLL1   | CPEB3    | CCDC6   | ARF6     | ANPEP    | ANK1     |
| CHMP4C   | CLIC6    | C1RL     | COG3     | CPEB4    | CCDC64B | ARFGAP2  | ANTXR1   | ANK3     |
| CHRM3    | CLINT1   | C7       | COMTD1   | CREB5    | CCDC84  | ARFGEF2  | ANTXR2   | ANKDD1A  |
| CITED2   | CLIP1    | CA12     | COQ10A   | CREBBP   | CCDC93  | ARHGAP1  | ANXA11   | ANKFY1   |
| CLDN1    | CLIP4    | CACNA1D  | CPEB2    | CRIM1    | CCKBR   | ARHGAP18 | ANXA6    | ANKH     |
| CLIP1    | CLK4     | CADM1    | CPEB3    | CRIPAK   | CCL28   | ARHGAP24 | AP1G1    | ANKHD1   |
| CLIP4    | CLMN     | CADPS    | CPEB4    | CRTC3    | CCND2   | ARHGAP28 | AP1S2    | ANKIB1   |
| CLK4     | CLRN3    | CAMK1D   | CREB3L2  | CSPP1    | CCNI    | ARHGEF5  | AP3M1    | ANKRD10  |
| CLMN     | CMYA5    | CAMSAP1  | CREB5    | CTAGE5   | CCNL1   | ARHGEF7  | AP4B1    | ANKRD11  |
| CLSTN2   | CNKS3    | CANX     | CREBBP   | CTTNBP2  | CCNT1   | ARID1B   | AP4E1    | ANKRD13A |
| CMTM8    | CNOT2    | CAPS2    | CRTC3    | CXCL16   | CCNYL1  | ARID4B   | AP4S1    | ANKRD13B |
| CMYA5    | CNOT6L   | CARD6    | CSMD3    | CXCL2    | CD274   | ARID5B   | APBB1IP  | ANKRD13C |



|         |         |          |         |         |          |         |          |          |
|---------|---------|----------|---------|---------|----------|---------|----------|----------|
| CNOT6L  | CNTN3   | CASC4    | CTAGE5  | CYP3A5  | CD2AP    | ARIH2   | APCDD1   | ANKRD17  |
| CNTN3   | CNTN4   | CASZ1    | CUX1    | CYP4V2  | CD44     | ARL13B  | APCDD1L  | ANKRD22  |
| COBLL1  | COBLL1  | CBX4     | CXCL16  | DAB2    | CD47     | ARL15   | APEH     | ANKRD23  |
| COG1    | COG3    | CCDC125  | CXCL2   | DAZAP2  | CDADC1   | ARL8A   | APH1A    | ANKRD24  |
| COG3    | COG5    | CCDC126  | CXXC4   | DCDC2   | CDC37L1  | ARL8B   | APLN     | ANKRD28  |
| COL12A1 | COL12A1 | CCDC146  | CYP3A5  | DCLRE1C | CDC42SE2 | ARMC2   | APLP2    | ANKRD32  |
| COL3A1  | COL27A1 | CCDC149  | CYP4V2  | DCP1A   | CDC73    | ARMC9   | APOBEC3F | ANKRD34A |
| COL4A4  | CPEB2   | CCDC17   | DAZAP2  | DDX58   | CDCA7L   | ARMCX4  | APOH     | ANKRD35  |
| COMTD1  | CPEB3   | CCDC50   | DCDC2   | DDX60L  | CDCP1    | ARNTL2  | APOL4    | ANKRD37  |
| CPEB2   | CPEB4   | CCDC59   | DCN     | DENND1B | CDKL2    | ARRB1   | APOL6    | ANKRD44  |
| CPEB3   | CREB5   | CCDC6    | DCTN4   | DENND2C | CDO1     | ARRDC1  | APPL1    | ANKRD52  |
| CPEB4   | CREBBP  | CCDC64B  | DDX58   | DERL1   | CDS1     | ARRDC3  | AQP11    | ANKRD53  |
| CRBN    | CRIM1   | CCDC84   | DDX60L  | DGKE    | CEACAM19 | ARRDC4  | AQP4     | ANKS1B   |
| CREB3L2 | CRIPAK  | CCDC93   | DENND1B | DHRS7   | CFLAR    | ARSK    | AQR      | ANKS6    |
| CREB5   | CROT    | CCL28    | DENND2C | DIRAS2  | CFTR     | ARX     | ARF1     | ANP32E   |
| CREBBP  | CRTC3   | CCND2    | DERL3   | DIRC2   | CGN      | ASB1    | ARF3     | ANPEP    |
| CRTC2   | CSNK1G1 | CCNI     | DGCR5   | DMGDH   | CHD2     | ASB4    | ARF6     | ANTXR1   |
| CRTC3   | CSPP1   | CCNL1    | DGKE    | DMXL1   | CHD6     | ASB5    | ARFGF2   | ANTXR2   |
| CSAD    | CTTNBP2 | CCNT1    | DHRS12  | DNAH1   | CHD9     | ASB6    | ARGLU1   | ANXA1    |
| CSMD3   | CUL9    | CCNYL1   | DIRC2   | DNAH11  | CHDH     | ASB7    | ARHGAP1  | ANXA11   |
| CST3    | CXCL16  | CD2AP    | DMD     | DNAH5   | CHRM3    | ASB8    | ARHGAP21 | ANXA6    |
| CTAGE5  | CXCL2   | CD44     | DMGDH   | DNAH6   | CLDN1    | ASCC3   | ARHGAP24 | AP1G1    |
| CUX1    | CYB5D1  | CD47     | DMKN    | DNAH7   | CLDN12   | ASCL2   | ARHGAP26 | AP1S2    |
| CXCL16  | CYP3A5  | CD59     | DNAH1   | DNAJA4  | CLDN23   | ASNS    | ARHGAP28 | AP3M1    |
| CXCL2   | DAAM1   | CD84     | DNAH11  | DNAJC22 | CLIC5    | ASPH    | ARHGAP30 | AP4B1    |
| CYP3A5  | DAB2    | CDCP1    | DNAH6   | DNAJC3  | CLIC6    | ASPN    | ARHGAP5  | AP4E1    |
| DAAM1   | DAZAP2  | CDKL1    | DNAH7   | DOCK5   | CLINT1   | ASPRV1  | ARHGEF11 | AP4S1    |
| DAZAP2  | DCDC2   | CDKL2    | DNAJA4  | DSEL    | CLIP1    | ASRGL1  | ARHGEF12 | APBB1IP  |
| DCDC2   | DCLK2   | CDKN2B   | DNAJC12 | DST     | CLIP4    | ASXL3   | ARHGEF19 | APCDD1   |
| DCN     | DCP1A   | CEACAM19 | DNAJC22 | DTNA    | CLMN     | ATAD3A  | ARHGEF2  | APCDD1L  |
| DCP1A   | DDAH1   | CEP120   | DNAJC3  | DTWD2   | CMTM8    | ATAD3B  | ARHGEF5  | APEH     |
| DCTN4   | DDHD1   | CFL2     | DNAJC4  | DTX3L   | CMYA5    | ATCAY   | ARHGEF7  | APH1A    |
| DDAH1   | DDX58   | CFLAR    | DOCK5   | DUSP1   | CNKSR2   | ATF7    | ARID1B   | APH1B    |
| DDHD1   | DDX60L  | CFTR     | DOCK8   | DUSP16  | CNKSR3   | ATF7IP2 | ARID2    | APLN     |
| DDX58   | DENND1B | CHD2     | DPP10   | DUSP23  | CNOT2    | ATG16L2 | ARID5B   | APLP2    |
| DDX60L  | DENND2C | CHD6     | DPP6    | DYRK1A  | CNOT6L   | ATG9B   | ARL13B   | APOBEC3F |
| DEF6    | DENND4C | CHD9     | DSEL    | ECHDC2  | CNTN3    | ATMIN   | ARL15    | APOH     |
| DENND1B | DERL1   | CHM      | DST     | EDN1    | COBLL1   | ATP11A  | ARL6IP6  | APOL4    |
| DENND2C | DGKE    | CHMP4C   | DTNA    | EPPD1   | COG3     | ATP11B  | ARL8A    | APOL6    |

|         |         |         |          |          |         |          |         |          |
|---------|---------|---------|----------|----------|---------|----------|---------|----------|
| DENND4C | DGKH    | CHRM3   | DTWD2    | EFCAB6   | COMTD1  | ATP2A2   | ARL8B   | APPL1    |
| DGCR5   | DHRS7   | CITED2  | DTX3L    | EGFR     | COQ10A  | ATP2A3   | ARMC10  | AQP11    |
| DGKE    | DIRAS2  | CLDN1   | DUSP1    | EGLN1    | CPEB2   | ATP5E    | ARMC4   | AQP4     |
| DHRS12  | DIRC2   | CLDN23  | DUSP16   | EGR1     | CPEB3   | ATP5G3   | ARMCX3  | AQR      |
| DHRS7   | DLC1    | CLEC16A | DUSP23   | EGR4     | CPEB4   | ATP5S    | ARMCX4  | AR       |
| DIO3OS  | DMGDH   | CLEC2D  | ECHDC2   | EHF      | CREB3L2 | ATP6V0E1 | ARNTL2  | ARAF     |
| DMD     | DNAH1   | CLIC6   | EDEM3    | EIF4E3   | CREB5   | ATP6V1C1 | ARRDC1  | ARF1     |
| DMGDH   | DNAH10  | CLINT1  | EFCAB6   | ELF3     | CREBBP  | ATP6V1D  | ARRDC3  | ARF3     |
| DNAH1   | DNAH2   | CLIP1   | EFHD2    | ELK4     | CRIM1   | ATP6V1G1 | ARRDC4  | ARF6     |
| DNAH10  | DNAH7   | CLIP4   | EGFR     | ELL2     | CRIPAK  | ATP8B2   | ARSI    | ARFGAP2  |
| DNAH2   | DNAJA4  | CLK4    | EGLN1    | ELOVL7   | CRTC3   | ATPIF1   | ARSK    | ARFGEF2  |
| DNAH7   | DNAJC22 | CLMN    | EGR1     | EML4     | CSMD3   | ATXN3    | ARX     | ARGLU1   |
| DNAJA4  | DNAJC27 | CLRN3   | EHF      | ENPP5    | CSPP1   | AURKAIP1 | ASB1    | ARHGAP1  |
| DNAJC1  | DNAJC3  | CLSTN2  | EIF2AK3  | EPB41L1  | CTAGE5  | AUTS2    | ASB4    | ARHGAP18 |
| DNAJC12 | DNALI1  | CMTM8   | EIF4E3   | EPB41L4A | CTTNBP2 | AVIL     | ASB5    | ARHGAP21 |
| DNAJC15 | DNHD1   | CMYA5   | ELF3     | EPB41L4B | CUX1    | B3GALNT1 | ASCC3   | ARHGAP24 |
| DNAJC21 | DOCK5   | CNKSR3  | ELK4     | EPC1     | CXCL16  | B3GALNT2 | ASCL2   | ARHGAP26 |
| DNAJC22 | DPP7    | CNOT2   | ELL2     | EPC2     | CXCL2   | B3GALT5  | ASNS    | ARHGAP28 |
| DNAJC3  | DST     | CNOT6L  | ELOF1    | EPHA6    | CXXC4   | B3GAT2   | ASPA    | ARHGAP30 |
| DNAJC4  | DTNA    | CNTN3   | ELOVL7   | EPN3     | CYP3A5  | B3GNT7   | ASPH    | ARHGAP5  |
| DOCK5   | DTX3L   | CNTN4   | EML4     | EPS8L2   | CYP4V2  | B4GALT6  | ASPHD2  | ARHGEF11 |
| DOCK8   | DUSP1   | COBLL1  | ENPP1    | ERAP2    | DAB2    | BAALC    | ASPM    | ARHGEF12 |
| DPP6    | DUSP16  | COG1    | ENPP5    | ERBB2IP  | DAZAP2  | BACE1    | ASPAN   | ARHGEF19 |
| DPP7    | DUSP18  | COG3    | ENTPD7   | ERBB3    | DCDC2   | BACH2    | ASPRV1  | ARHGEF2  |
| DST     | DZIP1L  | COG5    | EPB41L4B | ERBB4    | DCLRE1C | BAG2     | ASXL3   | ARHGEF5  |
| DTNA    | EBF1    | COL12A1 | EPC1     | ERC1     | DCN     | BAG5     | ATAD2   | ARHGEF7  |
| DTX3L   | ECHDC2  | COL27A1 | EPN3     | ERCC6    | DCP1A   | BAIAP2L1 | ATAD2B  | ARID1B   |
| DUSP1   | EDN1    | COL3A1  | ERBB3    | ERN1     | DCTN4   | BAIAP2L2 | ATAD3B  | ARID2    |
| DUSP16  | EEA1    | COL4A4  | ERC1     | ERP27    | DDX58   | BANP     | ATCAY   | ARID4B   |
| DUSP18  | EEDP1   | COMTD1  | ERCC6    | ERRF1    | DDX60L  | BASP1    | ATF7    | ARID5B   |
| DYM     | EFCAB6  | CPEB2   | ERN1     | ETS2     | DENND1B | BATF2    | ATF7IP  | ARIH2    |
| ECHDC2  | EGFR    | CPEB3   | ERP27    | ETV6     | DENND2C | BAZ1B    | ATG16L2 | ARL13B   |
| EDEM3   | EGLN1   | CPEB4   | ERRF1    | EXOC6    | DERL1   | BBS1     | ATG4D   | ARL15    |
| EDN1    | EGR1    | CRBN    | ETS2     | EYS      | DERL3   | BBS12    | ATG7    | ARL6IP6  |
| EFCAB1  | ELF2    | CREB3L2 | ETV6     | F5       | DGCR5   | BBS2     | ATG9B   | ARL8A    |
| EFCAB6  | ELF3    | CREB5   | EXD2     | FA2H     | DGKE    | BBS5     | ATMIN   | ARL8B    |
| EFHD2   | ELK4    | CREBBP  | FA2H     | FAM102A  | DHRS12  | BCAT1    | ATP11A  | ARMC10   |
| EGFR    | ELL2    | CRIM1   | FAM102A  | FAM107B  | DHRS7   | BCL2L11  | ATP11B  | ARMC2    |
| EGLN1   | ELOVL7  | CRIPAK  | FAM105A  | FAM111A  | DIRAS2  | BCL2L13  | ATP11C  | ARMC4    |

|          |          |         |          |          |         |           |          |         |
|----------|----------|---------|----------|----------|---------|-----------|----------|---------|
| EGR1     | EMP1     | CROT    | FAM107B  | FAM122A  | DIRC2   | BCL2L14   | ATP13A4  | ARMC9   |
| EIF2A    | ENAM     | CRTC2   | FAM122A  | FAM124A  | DMD     | BCL2L15   | ATP2A2   | ARMCX3  |
| EIF2AK3  | ENPP5    | CRTC3   | FAM160A1 | FAM135A  | DMGDH   | BCL6B     | ATP2A3   | ARMCX4  |
| EIF4E3   | EPB41L1  | CSAD    | FAM162A  | FAM160A1 | DMKN    | BCLAF1    | ATP5G3   | ARNTL2  |
| ELF2     | EPB41L4A | CSMD3   | FAM3B    | FAM3B    | DMXL1   | BCO2      | ATP5S    | ARRB1   |
| ELF3     | EPC1     | CSNK1G1 | FAM46C   | FAM46A   | DNAH1   | BCORL1    | ATP6V0B  | ARRDC1  |
| ELK4     | EPC2     | CSPP1   | FAM63A   | FAM46C   | DNAH11  | BCR       | ATP6V0E1 | ARRDC3  |
| ELL2     | EPN3     | CST3    | FAM83B   | FAM63A   | DNAH5   | BDP1      | ATP6V1C1 | ARRDC4  |
| ELOVL7   | ERAP2    | CTAGE5  | FAM83F   | FAM81A   | DNAH6   | BET1L     | ATP8B2   | ARSI    |
| EML4     | ERBB2IP  | CTTNBP2 | FAM91A1  | FAM83B   | DNAH7   | BEX2      | ATP8B3   | ARSK    |
| EMP1     | ERBB4    | CUL9    | FBXO2    | FAM83F   | DNAJA4  | BEX5      | ATXN1    | ARX     |
| EMP2     | ERC1     | CUX1    | FBXO25   | FAM91A1  | DNAJC12 | BHMT2     | ATXN3    | ASB1    |
| ENAM     | ERCC6    | CXCL16  | FBXO32   | FARP2    | DNAJC22 | BICD1     | ATXN7    | ASB4    |
| ENPP1    | ERN1     | CXCL2   | FBXO4    | FBXO25   | DNAJC3  | BIVM      | ATXN7L1  | ASB5    |
| ENTPD7   | ERP27    | CYB5D1  | FBXW7    | FBXO32   | DNAJC4  | BLOC1S2   | AUTS2    | ASB6    |
| EPB41L4B | ERRF1    | CYP3A5  | FER1L5   | FBXO4    | DOCK5   | BMPER     | AVIL     | ASB7    |
| EPB41L5  | ESAM     | DAAM1   | FGD4     | FER      | DOCK8   | BMPR1A    | AXIN2    | ASB8    |
| EPC1     | ETS1     | DAB2    | FGF12    | FERMT1   | DPP10   | BMPR2     | AZI2     | ASCC3   |
| EPN3     | ETS2     | DAZAP2  | FHDC1    | FGD4     | DPP6    | BNIP2     | B2M      | ASCL2   |
| ERAP2    | ETV6     | DCDC2   | FITM2    | FGFR2    | DSEL    | BPNT1     | B3GALNT1 | ASNS    |
| ERBB2IP  | EXOC6    | DCLK2   | FKBP11   | FMN1     | DST     | BPTF      | B3GALNT2 | ASPA    |
| ERBB3    | EXT1     | DCN     | FKBP5    | FNIP1    | DTNA    | BRD7      | B3GALT1  | ASPH    |
| ERBB4    | EYA4     | DCP1A   | FNDC1    | FNIP2    | DTWD2   | BRI3      | B3GALT6  | ASPHD2  |
| ERC1     | EYS      | DCTN4   | FNIP2    | FOXO3    | DTX3L   | BRWD3     | B3GAT2   | ASPM    |
| ERCC6    | F5       | DDAH1   | FOXN2    | FOXP1    | DUSP1   | BTBD10    | B3GNT7   | ASPN    |
| ERN1     | FA2H     | DDHD1   | FOXO1    | FRAS1    | DUSP16  | BTBD11    | B4GALT6  | ASPRV1  |
| ERP27    | FAM102A  | DDX58   | FOXO3    | FRK      | DUSP23  | BTBD6     | BACE1    | ASRGL1  |
| ERRF1    | FAM107B  | DDX60L  | FOXP1    | FRS2     | DYRK1A  | BTBD7     | BACH1    | ASXL3   |
| ETS1     | FAM110B  | DEF6    | FOXP2    | FSD1L    | ECHDC2  | BTBD9     | BACH2    | ATAD2   |
| ETS2     | FAM110C  | DENND1B | FRK      | FUCA1    | EDEM3   | BTC       | BAD      | ATAD2B  |
| ETV5     | FAM120B  | DENND2C | FRMD3    | GAB1     | EDN1    | BTD       | BAG1     | ATAD3A  |
| ETV6     | FAM126B  | DENND4C | FSD2     | GABPB2   | EEPDI   | BTF3      | BAG2     | ATAD3B  |
| EXD2     | FAM160A1 | DERL1   | FUCA1    | GABRB3   | EFCAB6  | BTN2A1    | BAG4     | ATCAY   |
| FA2H     | FAM3B    | DGCR5   | GABPB2   | GAN      | EFHD2   | BTRC      | BAG5     | ATF7    |
| FAAH2    | FAM46A   | DGKE    | GALNT5   | GATA6    | EGFR    | BVES      | BAIAP2L1 | ATF7IP  |
| FAM102A  | FAM46C   | DGKH    | GAN      | GATM     | EGLN1   | C1GALT1   | BAIAP2L2 | ATF7IP2 |
| FAM107B  | FAM63A   | DHRS12  | GATM     | GBP1     | EGR1    | C1GALT1C1 | BANP     | ATG16L2 |
| FAM110C  | FAM65A   | DHRS7   | GBP1     | GBP3     | EGR4    | C1RL      | BARD1    | ATG4D   |
| FAM114A1 | FAM73A   | DIO3OS  | GDAP1    | GCLM     | EHF     | C2CD3     | BASP1    | ATG7    |

|          |         |         |         |         |          |          |         |          |
|----------|---------|---------|---------|---------|----------|----------|---------|----------|
| FAM160A1 | FAM83B  | DIRAS2  | GGT6    | GDAP1   | EIF2AK3  | C7       | BAZ1B   | ATG9B    |
| FAM160B2 | FAM84A  | DIRC2   | GHRL    | GDF15   | EIF4E3   | CA10     | BBS1    | ATMIN    |
| FAM3B    | FAM91A1 | DLC1    | GIGYF2  | GDNF    | ELF3     | CA12     | BBS2    | ATP11A   |
| FAM46A   | FANK1   | DMD     | GIT2    | GGT6    | ELK4     | CA8      | BBS5    | ATP11B   |
| FAM46C   | FARP2   | DMGDH   | GKAP1   | GHRL    | ELL2     | CABLES1  | BCAN    | ATP11C   |
| FAM63A   | FBXL17  | DNAH1   | GLIS3   | GK5     | ELOF1    | CABP7    | BCAT1   | ATP13A4  |
| FAM65A   | FBXO25  | DNAH10  | GLRB    | GKAP1   | ELOVL7   | CACNA1B  | BCDIN3D | ATP2A2   |
| FAM73A   | FBXO32  | DNAH2   | GNPTAB  | GLIPR1  | EML4     | CACNA1C  | BCL11A  | ATP2A3   |
| FAM83B   | FBXO38  | DNAH7   | GOLT1A  | GLIS3   | ENPP1    | CACNA1D  | BCL2L1  | ATP5E    |
| FAM84A   | FBXO4   | DNAJA4  | GPATCH4 | GLRB    | ENPP5    | CACNA2D1 | BCL2L11 | ATP5G3   |
| FAM91A1  | FER     | DNAJC1  | GPR146  | GOLT1A  | ENTPD7   | CACNB4   | BCL2L12 | ATP5S    |
| FANK1    | FER1L5  | DNAJC12 | GPR155  | GPATCH2 | EPB41L1  | CACNG2   | BCL2L13 | ATP6V0B  |
| FARP2    | FGA     | DNAJC15 | GPR160  | GPATCH4 | EPB41L4A | CACNG7   | BCL2L14 | ATP6V0E1 |
| FBXL17   | FGD3    | DNAJC21 | GPRC5A  | GPBP1   | EPB41L4B | CADM1    | BCL6B   | ATP6V1C1 |
| FBXO32   | FGFR2   | DNAJC22 | GPRC5B  | GPR160  | EPC1     | CADPS    | BCL9L   | ATP6V1D  |
| FBXO4    | FITM2   | DNAJC27 | GPRIN3  | GPRC5A  | EPC2     | CALCOCO2 | BCLAF1  | ATP6V1G1 |
| FBXO6    | FKBP15  | DNAJC3  | GSTO2   | GPRC5B  | EPHA6    | CALCRL   | BCO2    | ATP8B2   |
| FBXW7    | FMN1    | DNAJC4  | GUCA1C  | GPRIN3  | EPN3     | CALD1    | BCOR    | ATP8B3   |
| FER      | FNIP1   | DNALI1  | GYLTL1B | GRAMD3  | EPS8L2   | CALU     | BCORL1  | ATPIF1   |
| FER1L5   | FNIP2   | DNHD1   | HBP1    | GRTP1   | ERAP2    | CAMK2D   | BCR     | ATXN1    |
| FGF10    | FOSL2   | DOCK5   | HDLBP   | GSG1    | ERBB2IP  | CAMK2G   | BDH2    | ATXN3    |
| FGFRL1   | FOXA1   | DOCK8   | HELZ    | GSTO2   | ERBB3    | CAMK2N1  | BDP1    | ATXN7    |
| FITM2    | FOXO3   | DPP6    | HERC1   | GUCY1A2 | ERBB4    | CAMKK1   | BEX2    | ATXN7L1  |
| FKBP11   | FOXP1   | DPP7    | HERPUD2 | GYLTL1B | ERC1     | CAND1    | BEX5    | AURKAIP1 |
| FKBP15   | FRK     | DST     | HEYL    | HBEGF   | ERCC6    | CAND2    | BHMT2   | AUTS2    |
| FKBP5    | FRMD3   | DTNA    | HFE     | HBP1    | ERN1     | CAPN1    | BID     | AVIL     |
| FNDC1    | FRMD6   | DTX3L   | HHLA2   | HCFC2   | ERP27    | CAPN13   | BIVM    | AXIN2    |
| FNDC3A   | FRS2    | DUSP1   | HIPK2   | HDAC9   | ERRFI1   | CAPRIN1  | BMP2K   | AZI2     |
| FNIP1    | FSD1L   | DUSP16  | HIPK3   | HECTD1  | ETS2     | CAPS     | BMP8B   | B2M      |
| FNIP2    | FUCA1   | DUSP18  | HIVEP3  | HELZ    | ETV6     | CAPS2    | BMPER   | B3GALNT1 |
| FOSL2    | GAB1    | DYM     | HKDC1   | HERC1   | EXD2     | CAPSL    | BMPR1A  | B3GALNT2 |
| FOXA1    | GAB3    | DZIP1L  | HM13    | HHLA2   | EXOC6    | CARD6    | BMPR1B  | B3GALT1  |
| FOXK1    | GABPB2  | EBF1    | HNF4G   | HIPK2   | EYS      | CASC4    | BMPR2   | B3GALT5  |
| FOXO1    | GALNT5  | ECHDC2  | HOOK1   | HIPK3   | F5       | CASD1    | BPTF    | B3GALT6  |
| FOXO3    | GAN     | EDEM3   | HS6ST3  | HIVEP2  | FA2H     | CASKIN1  | BRD7    | B3GAT2   |
| FOXP1    | GATA6   | EDN1    | HSPH1   | HIVEP3  | FAM102A  | CASP9    | BRD8    | B3GNT7   |
| FOXP2    | GATAD2B | EEA1    | HYI     | HKDC1   | FAM105A  | CASR     | BRI3    | B4GALT6  |
| FRK      | GATM    | EEPD1   | ICA1    | HLA-DOA | FAM107B  | CASZ1    | BRI3BP  | BAALC    |
| FRMD3    | GDF15   | EFCAB1  | IFNAR1  | HNF4G   | FAM111A  | CBFA2T2  | BRWD1   | BACE1    |

|         |          |          |         |        |          |         |          |          |
|---------|----------|----------|---------|--------|----------|---------|----------|----------|
| FSD2    | GDNF     | EFCAB6   | IFRD1   | HNRNPU | FAM122A  | CBL     | BRWD3    | BACH1    |
| FUCA1   | GFRA3    | EFHD2    | IGF1    | HOOK1  | FAM124A  | CC2D1B  | BTBD11   | BACH2    |
| FYTTD1  | GHRL     | EGFR     | IGSF11  | HS6ST3 | FAM135A  | CC2D2A  | BTBD7    | BAD      |
| GAB1    | GIPR     | EGLN1    | IKZF2   | HSPB8  | FAM160A1 | CC2D2B  | BTBD9    | BAG1     |
| GABPB2  | GK5      | EGR1     | IKZF5   | HSPH1  | FAM162A  | CCDC108 | BTF3     | BAG2     |
| GALNT5  | GKAP1    | EIF2A    | IL17RA  | ICA1L  | FAM3B    | CCDC112 | BTN2A1   | BAG4     |
| GATA4   | GLIPR1   | EIF2AK3  | IL17RB  | IFNAR1 | FAM46A   | CCDC113 | BTNL9    | BAG5     |
| GATA6   | GLIS3    | EIF4E3   | IL17RE  | IFNAR2 | FAM46C   | CCDC126 | BTRC     | BAIAP2L1 |
| GATM    | GLRB     | ELF2     | IL20RA  | IFRD1  | FAM63A   | CCDC134 | BUB3     | BAIAP2L2 |
| GDF15   | GLS      | ELF3     | IL6R    | IFT57  | FAM81A   | CCDC137 | BVES     | BANP     |
| GHRL    | GNG12    | ELK4     | ILDR1   | IGSF11 | FAM83B   | CCDC14  | C1GALT1  | BARD1    |
| GIGYF2  | GON4L    | ELL2     | INADL   | IGSF5  | FAM83F   | CCDC151 | C1RL     | BASP1    |
| GIPR    | GPATCH2  | ELOVL7   | INO80   | IKZF2  | FAM91A1  | CCDC17  | C7       | BATF2    |
| GIT2    | GPR132   | EML4     | INO80D  | IKZF5  | FARP2    | CCDC23  | CA10     | BAZ1B    |
| GK5     | GPR157   | EMP1     | INPP4B  | IL17RB | FBXO2    | CCDC3   | CA12     | BBS1     |
| GLIS3   | GPR39    | EMP2     | INSR    | IL1RL1 | FBXO25   | CCDC34  | CA8      | BBS12    |
| GLRB    | GPRC5A   | ENAM     | INTS10  | IL20RA | FBXO32   | CCDC40  | CABLES1  | BBS2     |
| GLS     | GPRIN3   | ENPP1    | INTS6   | IL6R   | FBXO4    | CCDC47  | CABLES2  | BBS5     |
| GNPTAB  | GPX2     | ENPP5    | IQGAP2  | ILDR1  | FBXW7    | CCDC57  | CABP7    | BCAN     |
| GOLGA3  | GRASP    | ENTPD7   | IRF1    | INADL  | FER      | CCDC6   | CABYR    | BCAT1    |
| GOLT1A  | GSG1     | EPB41L1  | IRF2BP2 | INO80  | FER1L5   | CCDC80  | CACHD1   | BCDIN3D  |
| GPHN    | GSTM3    | EPB41L4A | IRF5    | INO80D | FERMT1   | CCDC84  | CACNA1B  | BCL11A   |
| GPR155  | GSTO2    | EPB41L4B | ITGB4   | INPP4B | FGD4     | CCDC85A | CACNA1C  | BCL2L1   |
| GPR157  | GTF2IRD2 | EPB41L5  | ITGB8   | INTS6  | FGF12    | CCDC88A | CACNA2D1 | BCL2L11  |
| GPR160  | GTSF1    | EPC1     | ITGBL1  | IQGAP2 | FGFR2    | CCDC88B | CACNG6   | BCL2L12  |
| GPRC5A  | GUCY1A2  | EPC2     | ITPR3   | IRAK2  | FHDC1    | CCDC88C | CACNG7   | BCL2L13  |
| GPRIN3  | GUCY1A3  | EPN3     | IYD     | IRF1   | FITM2    | CCDC90B | CACNG8   | BCL2L14  |
| GRK4    | HBEGF    | ERAP2    | JAK1    | IRF5   | FKBP11   | CCDC96  | CADPS    | BCL2L15  |
| GSTM3   | HBP1     | ERBB2IP  | JMJD1C  | ITGB4  | FKBP5    | CCKBR   | CALCOCO2 | BCL6B    |
| GSTO2   | HCFC2    | ERBB3    | JMY     | ITGB8  | FMN1     | CCND2   | CALCRL   | BCL9L    |
| GTSF1   | HDAC9    | ERBB4    | JPH1    | ITPR1  | FNDC1    | CCNDBP1 | CALU     | BCLAF1   |
| GUCA1C  | HECA     | ERC1     | KANK4   | ITPR3  | FNIP1    | CCNG2   | CAMK1D   | BCO2     |
| GUCY1A2 | HECTD1   | ERCC6    | KBTBD12 | IYD    | FNIP2    | CCNK    | CAMK2D   | BCOR     |
| GUCY1A3 | HELZ     | ERN1     | KCNAB1  | JAG1   | FOXN2    | CCNL1   | CAMK2G   | BCORL1   |
| HBEGF   | HERC1    | ERP27    | KCNIP3  | JAK1   | FOXO1    | CCNL2   | CAMK2N1  | BCR      |
| HBP1    | HGD      | ERRFI1   | KCNJ11  | JMJD1C | FOXO3    | CD109   | CAMKK1   | BDH2     |
| HCFC2   | HGSNAT   | ESAM     | KCNJ15  | KCNAB1 | FOXP1    | CD300LG | CAMSAP1  | BDP1     |
| HDLBP   | HIPK2    | ETS1     | KCNJ16  | KCNJ15 | FOXP2    | CD36    | CAMTA1   | BET1L    |
| HEATR5B | HIPK3    | ETS2     | KCNJ5   | KCNJ16 | FRAS1    | CD44    | CAND1    | BEX2     |

|         |         |          |          |           |         |          |          |           |
|---------|---------|----------|----------|-----------|---------|----------|----------|-----------|
| HECA    | HIVEP2  | ETV5     | KCNK3    | KCTD16    | FRK     | CD47     | CAND2    | BEX5      |
| HECTD1  | HIVEP3  | ETV6     | KCTD16   | KIAA1109  | FRMD3   | CD48     | CANX     | BHMT2     |
| HELZ    | HKDC1   | EXD2     | KIAA0368 | KIAA1217  | FRS2    | CD5      | CAPN1    | BICD1     |
| HERC1   | HMBOX1  | EXOC6    | KIAA1109 | KIAA1324  | FSD1L   | CD53     | CAPN12   | BID       |
| HERPUD2 | HNF4A   | EXT1     | KIAA1143 | KIAA1328  | FSD2    | CD59     | CAPN13   | BIVM      |
| HEYL    | HNF4G   | EYA4     | KIAA1161 | KIAA1468  | FUCA1   | CD84     | CAPNS2   | BLOC1S2   |
| HFE     | HNMT    | EYS      | KIAA1217 | KIAA1522  | GAB1    | CD8B     | CAPRIN1  | BMP2K     |
| HGD     | HOOK1   | F5       | KIAA1324 | KIAA1671  | GABPB2  | CD9      | CAPS     | BMP8B     |
| HGSNAT  | HOOK3   | FA2H     | KIAA1522 | KIAA1683  | GABRB3  | CD99L2   | CAPSL    | BMPER     |
| HHIP    | HSPA1L  | FAAH2    | KIAA1683 | KIAA2022  | GALNT5  | CDADC1   | CARD8    | BMPR1A    |
| HIPK2   | HSPA5   | FAM102A  | KIAA2022 | KIAA2026  | GAN     | CDC34    | CARHSP1  | BMPR1B    |
| HIPK3   | HSPB8   | FAM107B  | KIAA2026 | KIF12     | GATA6   | CDC42    | CARS     | BMPR2     |
| HIVEP2  | HSPH1   | FAM110B  | KIF12    | KIF1B     | GATM    | CDC42BPA | CASC4    | BNIP2     |
| HIVEP3  | IAH1    | FAM110C  | KIF1A    | KIF21A    | GBP1    | CDC42EP3 | CASC5    | BPNT1     |
| HKDC1   | ICA1L   | FAM114A1 | KIF1B    | KIF27     | GBP3    | CDC42SE1 | CASD1    | BPTF      |
| HM13    | IFNAR1  | FAM120B  | KIF21A   | KIF9      | GCLM    | CDC42SE2 | CASK     | BRD7      |
| HMBOX1  | IFNAR2  | FAM126B  | KLF13    | KLF2      | GDAP1   | CDCA7    | CASP2    | BRD8      |
| HNF4A   | IFRD1   | FAM160A1 | KLF15    | KLF3      | GDF15   | CDCP1    | CASP9    | BRI3      |
| HNF4G   | IFT172  | FAM160B2 | KLF2     | KLF6      | GDNF    | CDH11    | CASZ1    | BRI3BP    |
| HOOK1   | IFT57   | FAM3B    | KLF3     | KLF7      | GGT6    | CDH24    | CATSPER3 | BRWD1     |
| HRASLS5 | IGSF11  | FAM46A   | KLF6     | KLF9      | GHRL    | CDH6     | CBFA2T2  | BRWD3     |
| HS6ST3  | IKZF2   | FAM46C   | KLF9     | KLHL15    | GIGYF2  | CDK6     | CBL      | BTBD10    |
| HSPA5   | IKZF5   | FAM63A   | KLHL15   | KLHL8     | GIT2    | CDK9     | CBLL1    | BTBD11    |
| HSPH1   | IL17RA  | FAM65A   | KLHL28   | KRT80     | GK5     | CDKL2    | CBS      | BTBD6     |
| HYI     | IL17RB  | FAM73A   | KLHL8    | KRTAP4-12 | GKAP1   | CDO1     | CC2D2A   | BTBD7     |
| IAH1    | IL20RA  | FAM83B   | KLK12    | KRTCAP3   | GLIPR1  | CDON     | CCDC107  | BTBD9     |
| ICA1    | IL6R    | FAM84A   | KRT80    | LAMA3     | GLIS3   | CDS2     | CCDC108  | BTC       |
| IFNAR1  | IL6ST   | FAM91A1  | KSR1     | LANCL2    | GLRB    | CEACAM19 | CCDC112  | BTD       |
| IFRD1   | ILDR1   | FANK1    | LAMA3    | LARP1B    | GNPTAB  | CECR2    | CCDC132  | BTF3      |
| IGF1    | INADL   | FARP2    | LANCL2   | LARP4     | GOLT1A  | CENPN    | CCDC134  | BTN2A1    |
| IKZF5   | INHBA   | FBXL17   | LARP1    | LATS1     | GPATCH2 | CENPT    | CCDC148  | BTNL9     |
| IL17RA  | INO80   | FBXO25   | LARP1B   | LATS2     | GPATCH4 | CEP152   | CCDC149  | BTRC      |
| IL17RB  | INO80D  | FBXO32   | LARP4    | LCA5L     | GPBP1   | CEP68    | CCDC150  | BUB3      |
| IL17RE  | INPP4B  | FBXO38   | LATS1    | LCOR      | GPR146  | CEP70    | CCDC151  | BVES      |
| IL6R    | INTS6   | FBXO4    | LCA5L    | LIMA1     | GPR155  | CEP97    | CCDC3    | C1GALT1   |
| IL6ST   | IQGAP2  | FBXO6    | LCOR     | LIPH      | GPR160  | CFC1     | CCDC47   | C1GALT1C1 |
| ILDR1   | IRAK2   | FBXW7    | LDHD     | LMO7      | GPRC5A  | CFL1     | CCDC50   | C1RL      |
| IMPAD1  | IRF1    | FER      | LENG8    | LMOD2     | GPRC5B  | CFL2     | CCDC57   | C2CD3     |
| INADL   | IRF2BP2 | FER1L5   | LGR4     | LMTK2     | GPRIN3  | CFTR     | CCDC58   | C7        |

|          |           |         |          |          |         |         |          |          |
|----------|-----------|---------|----------|----------|---------|---------|----------|----------|
| INHBA    | ITGA2     | FGA     | LIPH     | LNPEP    | GRAMD3  | CGGBP1  | CCDC64B  | CA10     |
| INO80D   | ITGB4     | FGD3    | LMAN1    | LNX2     | GRTP1   | CGN     | CCDC66   | CA12     |
| INPP4B   | ITGB8     | FGF10   | LMO3     | LONRF2   | GSG1    | CHCHD7  | CCDC77   | CA8      |
| INSR     | ITPR1     | FGFR2   | LMO7     | LPCAT2   | GSTO2   | CHD1L   | CCDC84   | CABLES1  |
| INTS10   | ITPRIPL2  | FGFRL1  | LMOD2    | LPGAT1   | GUCA1C  | CHD6    | CCDC88A  | CABLES2  |
| INTS6    | JAG1      | FITM2   | LMTK2    | LPP      | GUCY1A2 | CHD7    | CCDC88C  | CABP7    |
| IRAK2    | JAK1      | FKBP11  | LNX2     | LRG1     | GYLTL1B | CHD9    | CCDC90B  | CABYR    |
| IRF1     | JMJD1C    | FKBP15  | LONRF2   | LRIG3    | HBEGF   | CHIC1   | CCDC96   | CACHD1   |
| IRF2BP2  | KCNAB1    | FKBP5   | LPAR3    | LRRC37A2 | HBP1    | CHL1    | CCKBR    | CACNA1B  |
| ITCH     | KCNJ16    | FMN1    | LPP      | LRRC37A3 | HCFC2   | CHML    | CCL28    | CACNA1C  |
| ITGA2    | KCTD16    | FNDC1   | LRG1     | LRRC55   | HDAC9   | CHMP4B  | CCNB2    | CACNA1D  |
| ITGB4    | KDM1B     | FNDC3A  | LRIG1    | LRRC7    | HDLBP   | CHMP4C  | CCND2    | CACNA2D1 |
| ITGB8    | KDM5A     | FNIP1   | LRIG3    | LRRC8E   | HECTD1  | CHORDC1 | CCNDBP1  | CACNB4   |
| ITGBL1   | KIAA1109  | FNIP2   | LRRC37A2 | LRRFIP2  | HELZ    | CHPT1   | CCNG2    | CACNG2   |
| ITPRIPL2 | KIAA1217  | FOSL2   | LRRRC7   | LRRK2    | HERC1   | CHRAC1  | CCNI     | CACNG6   |
| JAK1     | KIAA1324  | FOXA1   | LRRRC8E  | LSG1     | HERPUD2 | CHRD12  | CCNK     | CACNG7   |
| JMJD1C   | KIAA1328  | FOXK1   | LRRFIP2  | LTBR     | HEYL    | CHRM3   | CCNL1    | CACNG8   |
| JMY      | KIAA1462  | FOXO1   | LRRK2    | LYNX1    | HFE     | CHST12  | CCNL2    | CADM1    |
| KALRN    | KIAA1468  | FOXO3   | LTBR     | LZTFL1   | HHLA2   | CHST14  | CCNY     | CADPS    |
| KANK4    | KIAA1671  | FOXP1   | LYNX1    | MACC1    | HIPK2   | CHST2   | CCNYL1   | CALCOCO2 |
| KCNAB1   | KIAA1683  | FOXP2   | MACC1    | MACF1    | HIPK3   | CHST9   | CCT4     | CALCRL   |
| KCNIP3   | KIAA2022  | FRK     | MAGI1    | MACROD2  | HIVEP2  | CHURC1  | CD109    | CALD1    |
| KCNJ16   | KIAA2026  | FRMD3   | MAGI3    | MAGI1    | HIVEP3  | CIAO1   | CD274    | CALU     |
| KCNJ3    | KIDINS220 | FRMD6   | MAL2     | MAGI3    | HKDC1   | CIAPIN1 | CD300LG  | CAMK1D   |
| KCNJ5    | KIF12     | FRS2    | MALAT1   | MAL2     | HLA-DOA | CISH    | CD36     | CAMK2D   |
| KCNK3    | KIF1B     | FSD1L   | MANEAL   | MANEAL   | HM13    | CKAP2   | CD44     | CAMK2G   |
| KCNK6    | KIF27     | FSD2    | MAP6D1   | MAP2     | HNF4G   | CLASP2  | CD47     | CAMK2N1  |
| KCNMA1   | KIF6      | FUCA1   | MARVELD2 | MAP3K2   | HNRNPU  | CLCN4   | CD48     | CAMKK1   |
| KCTD16   | KLF2      | FYTTD1  | MARVELD3 | MAP3K8   | HOOK1   | CLDN12  | CD5      | CAMSAP1  |
| KIAA1109 | KLF3      | GAB1    | MAST4    | MAPK4    | HS6ST3  | CLDN23  | CD53     | CAMTA1   |
| KIAA1143 | KLF6      | GAB3    | MBNL1    | MARVELD2 | HSPB8   | CLDND1  | CD59     | CAND1    |
| KIAA1217 | KLF7      | GABPB2  | MBNL3    | MARVELD3 | HSPH1   | CLEC14A | CD8B     | CAND2    |
| KIAA1324 | KLF9      | GALNT5  | MBP      | MAST4    | HYI     | CLEC2D  | CD99L2   | CANX     |
| KIAA1328 | KLHDC10   | GAN     | MCL1     | MBNL1    | ICA1    | CLEC3A  | CDADC1   | CAPN1    |
| KIAA1671 | KLHL15    | GATA4   | MCOLN3   | MBOAT1   | ICA1L   | CLIC6   | CDC14B   | CAPN12   |
| KIAA1683 | KLHL24    | GATA6   | MCTP2    | MBP      | IFNAR1  | CLINT1  | CDC26    | CAPN13   |
| KIAA2022 | KLHL5     | GATAD2B | MDM4     | MCL1     | IFNAR2  | CLIP1   | CDC37L1  | CAPNS2   |
| KIAA2026 | KLHL8     | GATM    | ME3      | MCOLN3   | IFRD1   | CLIP3   | CDC42    | CAPRIN1  |
| KIF12    | KREMEN1   | GDF15   | MED13    | MCTP2    | IFT57   | CLIP4   | CDC42BPA | CAPS     |

|         |           |          |          |         |         |          |            |          |
|---------|-----------|----------|----------|---------|---------|----------|------------|----------|
| KIF1B   | KRTAP3-1  | GDNF     | MED13L   | MDM4    | IGF1    | CLK3     | CDC42EP3   | CAPS2    |
| KIF27   | KRTAP4-12 | GFRA3    | MEF2D    | ME3     | IGSF11  | CLMN     | CDC42SE1   | CAPSL    |
| KLB     | KSR2      | GHRL     | MEG3     | MED13   | IGSF5   | CLN8     | CDC42SE2   | CARD6    |
| KLF13   | L3MBTL4   | GIGYF2   | MFSD4    | MED13L  | IKZF2   | CLPB     | CDCA3      | CARD8    |
| KLF2    | LAMA3     | GIPR     | MFSD6    | MEF2D   | IKZF5   | CLPX     | CDCA7      | CARHSP1  |
| KLF3    | LAMP2     | GIT2     | MFSD9    | MEG3    | IL17RA  | CLSTN2   | CDCP1      | CARS     |
| KLF6    | LANCL2    | GK5      | MGAT4A   | MFSD4   | IL17RB  | CLTC     | CDH11      | CASC4    |
| KLF7    | LARP1B    | GKAP1    | MGP      | MFSD6   | IL17RE  | CLUAP1   | CDH24      | CASC5    |
| KLF9    | LATS1     | GLIPR1   | MINA     | MGAT4A  | IL1RL1  | CMIP     | CDH6       | CASD1    |
| KLHL15  | LATS2     | GLIS3    | MITF     | MGLL    | IL20RA  | CMTM3    | CDK6       | CASK     |
| KLHL28  | LCA5      | GLRB     | MKNK1    | MICAL3  | IL6R    | CMTM4    | CDK9       | CASKIN1  |
| KLHL8   | LCA5L     | GLS      | MKNK2    | MITF    | ILDR1   | CMTM6    | CDKL1      | CASP2    |
| KLK12   | LCOR      | GNG12    | MLLT6    | MLLT4   | INADL   | CMTM8    | CDKN2AIPNL | CASP9    |
| KSR1    | LEPROT    | GNPTAB   | MLXIP    | MMAA    | INO80   | CNDP2    | CDKN2B     | CASR     |
| KSR2    | LIMA1     | GOLGA3   | MLYCD    | MPP5    | INO80D  | CNIH3    | CDON       | CASZ1    |
| L3MBTL4 | LIMCH1    | GOLT1A   | MMAA     | MPP7    | INPP4B  | CNKSRR3  | CDS1       | CATSPER3 |
| LAMA3   | LIPH      | GON4L    | MPP7     | MPZL3   | INSR    | CNOT6L   | CDS2       | CBFA2T2  |
| LAMB4   | LMAN1     | GPATCH2  | MPZL3    | MR1     | INTS10  | CNOT7    | CEACAM19   | CBL      |
| LAMP2   | LMBRD1    | GPHN     | MTBP     | MTDH    | INTS6   | CNRIP1   | CECR6      | CBLL1    |
| LARP1   | LMLN      | GPR132   | MTDH     | MTF1    | IQGAP2  | CNTN1    | CENPK      | CBS      |
| LARP1B  | LMNA      | GPR155   | MTHFR    | MTHFD2L | IRAK2   | CNTN3    | CENPN      | CC2D1B   |
| LATS1   | LMO2      | GPR157   | MTMR12   | MTMR12  | IRF1    | CNTN4    | CENPO      | CC2D2A   |
| LCA5L   | LMO7      | GPR160   | MTPAP    | MTMR3   | IRF2BP2 | CNTN5    | CEP152     | CC2D2B   |
| LCOR    | LMTK2     | GPR39    | MTR      | MTMR7   | IRF5    | CNTNAP3  | CEP63      | CCDC107  |
| LCP2    | LNPEP     | GPRC5A   | MTUS1    | MTPAP   | ITGB4   | COG2     | CEP68      | CCDC108  |
| LENG8   | LNX1      | GPRIN3   | MTUS2    | MTUS1   | ITGB8   | COG3     | CEP70      | CCDC112  |
| LEPROT  | LONRF2    | GPX2     | MUC20    | MUC20   | ITGBL1  | COG6     | CFC1       | CCDC113  |
| LGR4    | LOXL4     | GRASP    | MXD1     | MUC4    | ITPR1   | COL12A1  | CFL1       | CCDC126  |
| LIFR    | LPCAT2    | GRK4     | MYADM    | MUM1L1  | ITPR3   | COL1A2   | CFLAR      | CCDC132  |
| LIMA1   | LPGAT1    | GSG1     | MYH11    | MXD1    | IYD     | COL27A1  | CFTR       | CCDC134  |
| LIPH    | LPP       | GSTM3    | MYH14    | MYADM   | JAG1    | COL3A1   | CGGBP1     | CCDC137  |
| LMAN1   | LPXN      | GSTO2    | MYLK2    | MYH14   | JAK1    | COL4A3BP | CGN        | CCDC14   |
| LMBRD1  | LRIG3     | GTF2IRD2 | MYO5A    | MYO5B   | JMJD1C  | COMMD2   | CHCHD1     | CCDC148  |
| LMLN    | LRP10     | GTSF1    | MYO5B    | MYO7B   | JMY     | COMMD7   | CHCHD3     | CCDC149  |
| LMNA    | LRRC37A2  | GUCA1C   | MYRIP    | MYRIP   | JPH1    | COPS7B   | CHCHD7     | CCDC150  |
| LMO3    | LRRC37A3  | GUCY1A2  | N4BP2L1  | MYSM1   | KANK4   | COPS8    | CHD1L      | CCDC151  |
| LMO7    | LRRC6     | GUCY1A3  | NAALADL1 | N4BP2L1 | KBTBD12 | COPZ2    | CHD6       | CCDC17   |
| LMTK2   | LRRC7     | HBEGF    | NALCN    | NALCN   | KCNAB1  | COQ10A   | CHD7       | CCDC23   |
| LNPEP   | LRRC8E    | HBP1     | NAPG     | NAPG    | KCNIP3  | COQ2     | CHD9       | CCDC3    |



|          |          |         |         |         |           |         |         |         |
|----------|----------|---------|---------|---------|-----------|---------|---------|---------|
| LNX1     | LRRFIP1  | HCFC2   | NCL     | NAT8L   | KCNJ11    | COQ4    | CHIC1   | CCDC34  |
| LNX2     | LRRFIP2  | HDAC9   | NCOA7   | NBEA    | KCNJ15    | CORO1C  | CHID1   | CCDC40  |
| LONRF2   | LRRK2    | HDLBP   | NEBL    | NCOA7   | KCNJ16    | CORO2A  | CHL1    | CCDC47  |
| LPAR3    | LTBP3    | HEATR5B | NEDD4L  | NEDD4L  | KCNJ5     | COTL1   | CHM     | CCDC50  |
| LPGAT1   | LYPD6B   | HECA    | NEXN    | NEDD9   | KCNK3     | COX19   | CHML    | CCDC57  |
| LPP      | LZTFL1   | HECTD1  | NFATC2  | NFAT5   | KCTD16    | COX4I1  | CHMP4C  | CCDC58  |
| LRGUK    | MACC1    | HELZ    | NFIA    | NFATC2  | KIAA0368  | CP      | CHORDC1 | CCDC6   |
| LRIG3    | MACF1    | HERC1   | NFIB    | NFIA    | KIAA1109  | CPD     | CHRD2   | CCDC64B |
| LRP10    | MAGI1    | HERPUD2 | NFIC    | NFIB    | KIAA1143  | CPEB3   | CHRM3   | CCDC66  |
| LRRC37A2 | MAGI3    | HEYL    | NFIX    | NFIC    | KIAA1161  | CPEB4   | CHST12  | CCDC77  |
| LRRC7    | MAL2     | HFE     | NFKBIA  | NFIX    | KIAA1217  | CPLX1   | CHST2   | CCDC80  |
| LRRC8E   | MAML2    | HGD     | NFKBIZ  | NFKBIA  | KIAA1324  | CPLX2   | CHST9   | CCDC84  |
| LRRFIP2  | MAP3K1   | HGSNAT  | NIPAL2  | NFKBIZ  | KIAA1328  | CPLX3   | CHURC1  | CCDC85A |
| LRRK2    | MAP3K2   | HHIP    | NKAPL   | NIPBL   | KIAA1468  | CPNE4   | CIAO1   | CCDC88A |
| LTBP2    | MAP3K8   | HIPK2   | NLK     | NKAPL   | KIAA1522  | CPNE8   | CIAPIN1 | CCDC88B |
| LTBP3    | MARVELD2 | HIPK3   | NLRC5   | NLRC5   | KIAA1671  | CPSF3   | CIB4    | CCDC88C |
| LTBR     | MAST4    | HIVEP2  | NMNAT3  | NMNAT3  | KIAA1683  | CPXM2   | CINP    | CCDC90B |
| LYNX1    | MBD6     | HIVEP3  | NOB1    | NOL10   | KIAA2022  | CRAMP1L | CIRBP   | CCDC96  |
| LYPD6B   | MBNL1    | HKDC1   | NOL10   | NOSTRIN | KIAA2026  | CRB1    | CIRH1A  | CCKBR   |
| LZTFL1   | MBOAT1   | HM13    | NOP58   | NPC1    | KIF12     | CRBN    | CITED4  | CCL28   |
| MACC1    | MBP      | HMBOX1  | NOSTRIN | NPNT    | KIF1A     | CREB3L4 | CKAP2   | CCNB2   |
| MAFB     | MCOLN3   | HNF4A   | NPNT    | NR1H4   | KIF1B     | CREB5   | CKAP4   | CCND2   |
| MAGI3    | MCTP2    | HNF4G   | NR1H4   | NR3C1   | KIF21A    | CREBBP  | CKLF    | CCNDBP1 |
| MAGIX    | MDM4     | HNMT    | NR3C1   | NRG4    | KIF27     | CREBZF  | CLASP2  | CCNG2   |
| MAL2     | ME3      | HOOK1   | NRG2    | NRSN1   | KIF9      | CREM    | CLCN4   | CCNI    |
| MALAT1   | MED10    | HOOK3   | NRG4    | NRXN3   | KLF13     | CRIM1   | CLDN1   | CCNK    |
| MAP3K8   | MED13    | HRASLS5 | NRIP3   | NT5DC3  | KLF15     | CRIP3   | CLDN12  | CCNL1   |
| MAPK9    | MED13L   | HS6ST3  | NRSN1   | NTN1    | KLF2      | CRIPAK  | CLDN23  | CCNL2   |
| MARVELD2 | MED23    | HSPA1L  | NSMAF   | NTN4    | KLF3      | CRTAP   | CLDN6   | CCNY    |
| MAST4    | MEF2A    | HSPA5   | NT5C1A  | NTRK2   | KLF6      | CRTC2   | CLDND1  | CCNYL1  |
| MBD6     | MEF2D    | HSPB8   | NT5DC3  | NUDT6   | KLF7      | CSNK1A1 | CLEC14A | CCT4    |
| MBNL1    | MEG3     | HSPH1   | NTN4    | NUP153  | KLF9      | CSNK1G3 | CLEC7A  | CD109   |
| MCEE     | MF12     | HY1     | NUCB2   | NUP214  | KLHL15    | CSNK2A2 | CLIP1   | CD274   |
| MCL1     | MFSD4    | IAH1    | NUP214  | OAS3    | KLHL28    | CSPP1   | CLIP3   | CD300LG |
| MCOLN3   | MFSD6    | ICA1    | OAF     | OCLN    | KLHL8     | CSTF3   | CLIP4   | CD36    |
| MCTP2    | MGLL     | ICA1L   | OCLN    | OFD1    | KLK12     | CTAGE5  | CLMN    | CD44    |
| MDM2     | MICAL2   | IFNAR1  | OFD1    | OGFRL1  | KRT80     | CTHRC1  | CLN8    | CD47    |
| MDM4     | MICAL3   | IFNAR2  | OGT     | ONECUT2 | KRTAP4-12 | CTNNA3  | CLNS1A  | CD48    |
| ME3      | MICALL2  | IFRD1   | OLA1    | OSBP2   | KRTCAP3   | CTNNB1  | CLOCK   | CD5     |

|          |         |          |         |         |           |           |          |            |
|----------|---------|----------|---------|---------|-----------|-----------|----------|------------|
| MED13    | MITF    | IFT172   | ONECUT2 | OSMR    | KSR1      | CTPS2     | CLPX     | CD53       |
| MED13L   | MLLT4   | IFT57    | OSBP2   | OTUD1   | LAMA3     | CTSC      | CLSTN2   | CD59       |
| MED23    | MLLT6   | IGF1     | OTUD1   | OTUD4   | LANCL2    | CTSS      | CLTC     | CD84       |
| MEF2D    | MMAA    | IGSF11   | OTUD4   | OTUD7A  | LARP1     | CTTNBP2   | CMIP     | CD8B       |
| MEG3     | MON2    | IKZF2    | PACSIN2 | PAK3    | LARP1B    | CTTNBP2NL | CMKLR1   | CD9        |
| METTTL7A | MPP5    | IKZF5    | PAK3    | PALMD   | LARP4     | CUL4A     | CMTM1    | CD99L2     |
| MFSD4    | MPP7    | IL17RA   | PAPD4   | PAPD4   | LATS1     | CUL5      | CMTM4    | CDADC1     |
| MFSD6    | MPZL2   | IL17RB   | PAPD5   | PAPD5   | LATS2     | CWC15     | CMTM7    | CDC14B     |
| MFSD9    | MPZL3   | IL17RE   | PARD3B  | PAQR5   | LCA5L     | CXADR     | CMTM8    | CDC26      |
| MGAT4A   | MSRA    | IL20RA   | PARD6B  | PARD3B  | LCOR      | CXCL17    | CNBP     | CDC34      |
| MGST3    | MTDH    | IL6R     | PARM1   | PARD6B  | LDHD      | CXCL2     | CNDP2    | CDC37L1    |
| MICAL2   | MTF1    | IL6ST    | PARP14  | PARP14  | LENG8     | CXXC4     | CNIH3    | CDC42      |
| MICAL3   | MTHFD2L | ILDR1    | PARP9   | PARP9   | LGR4      | CXXC5     | CNOT2    | CDC42BPA   |
| MINA     | MTMR3   | IMPAD1   | PCGF5   | PATL1   | LIMA1     | CYB561D1  | CNOT6    | CDC42EP3   |
| MITF     | MTR     | INADL    | PCM1    | PCGF5   | LIPH      | CYB5B     | CNOT7    | CDC42SE1   |
| MKNK1    | MTUS1   | INHBA    | PCMTD1  | PCM1    | LMAN1     | CYB5R4    | CNPY3    | CDC42SE2   |
| MKNK2    | MTUS2   | INO80    | PDE11A  | PCNXL2  | LMO3      | CYBA      | CNPY4    | CDCA3      |
| MLLT6    | MUC20   | INO80D   | PDE7B   | PDE12   | LMO7      | CYBB      | CNRIP1   | CDCA7      |
| MLXIP    | MUC4    | INPP4B   | PDE8A   | PDE1C   | LMOD2     | CYBRD1    | CNTLN    | CDCP1      |
| MLYCD    | MUM1L1  | INSR     | PDK4    | PDE3A   | LMTK2     | CYCS      | CNTN1    | CDH11      |
| MMAA     | MXD1    | INTS10   | PDLIM5  | PDE7B   | LNPEP     | CYHR1     | CNTN2    | CDH24      |
| MON2     | MXRA7   | INTS6    | PDZD8   | PDE8A   | LN2       | CYP19A1   | CNTN4    | CDH6       |
| MPP7     | MYADM   | IQGAP2   | PELI2   | PDE8B   | LONRF2    | CYP26B1   | CNTN5    | CDK6       |
| MPZL2    | MYH14   | IRAK2    | PEX5L   | PDGFC   | LPAR3     | CYP2S1    | CNTNAP3  | CDK9       |
| MPZL3    | MYH7B   | IRF1     | PGPEP1  | PDGFD   | LPCAT2    | CYP2U1    | CNTROB   | CDKL1      |
| MS4A1    | MYLIP   | IRF2BP2  | PHACTR1 | PDK4    | LPGAT1    | CYP3A5    | COBLL1   | CDKL2      |
| MSRA     | MYO15B  | ITCH     | PHACTR4 | PDLIM5  | LPP       | CYP4V2    | COG1     | CDKN2AIPNL |
| MTDH     | MYO1C   | ITGA2    | PHC3    | PDZD8   | LRG1      | CYP4X1    | COG5     | CDKN2B     |
| MTHFR    | MYO5B   | ITGB4    | PHF11   | PGBD4   | LRIG1     | CYYR1     | COG6     | CDO1       |
| MTMR3    | MYSM1   | ITGB8    | PHKA1   | PHACTR4 | LRIG3     | D2HGDH    | COL12A1  | CDON       |
| MTR      | N4BP2L1 | ITGBL1   | PHYHD1  | PHC3    | LRRRC37A2 | DAAM1     | COL1A2   | CDS1       |
| MTUS1    | NALCN   | ITPR1    | PHYHIPL | PHF11   | LRRRC37A3 | DAB2      | COL20A1  | CDS2       |
| MTUS2    | NAPG    | ITPRIPL2 | PIGM    | PHF20L1 | LRRRC55   | DAB2IP    | COL23A1  | CEACAM19   |
| MUC20    | NAPSA   | JAG1     | PIK3AP1 | PHLDB2  | LRRRC7    | DACH1     | COL27A1  | CECR2      |
| MUM1L1   | NCOA7   | JAK1     | PIP5KL1 | PIK3AP1 | LRRRC8E   | DACH2     | COL3A1   | CECR6      |
| MXD1     | NEDD4L  | JMJD1C   | PITRM1  | PIP5KL1 | LRRFIP2   | DACT3     | COL4A3BP | CENPK      |
| MXRA7    | NEDD9   | JMY      | PIWIL4  | PITRM1  | LRRK2     | DAPL1     | COL8A1   | CENPN      |
| MYADM    | NEXN    | KALRN    | PLA2G16 | PIWIL4  | LSG1      | DAZAP2    | COMMD1   | CENPO      |
| MYH11    | NFAT5   | KANK4    | PLD1    | PLCD4   | LTBR      | DBR1      | COMMD6   | CENPT      |

|         |         |           |           |           |          |         |         |         |
|---------|---------|-----------|-----------|-----------|----------|---------|---------|---------|
| MYH14   | NFATC2  | KCNAB1    | PLEKHA7   | PLCG2     | LYNX1    | DCAKD   | COPB1   | CEP152  |
| MYLIP   | NFIA    | KCNIP3    | PLEKHH1   | PLD1      | LZTFL1   | DCBLD1  | COPB2   | CEP63   |
| MYLK2   | NFIB    | KCNJ16    | PLEKHH2   | PLEKHA2   | MACC1    | DCBLD2  | COPS8   | CEP68   |
| MYO1C   | NFIC    | KCNJ3     | PLK3      | PLEKHA7   | MACF1    | DCLK1   | COPZ1   | CEP70   |
| MYO5B   | NFKBIA  | KCNJ5     | PLSCR2    | PLEKHH1   | MACROD2  | DCN     | COPZ2   | CEP97   |
| MYRIP   | NFKBIZ  | KCNK3     | PNPLA7    | PLEKHH2   | MAGI1    | DCP1A   | COQ10A  | CFC1    |
| MYT1L   | NIPAL2  | KCNK6     | PNPLA8    | PLSCR1    | MAGI3    | DCP1B   | COQ2    | CFL1    |
| N4BP2L1 | NIPBL   | KCNMA1    | PODN      | PMEP A1   | MAL2     | DCST2   | COQ9    | CFL2    |
| NALCN   | NKTR    | KCTD16    | POLD3     | PNPLA8    | MALAT1   | DCTN2   | CORO2A  | CFLAR   |
| NAPG    | NLRC5   | KDM1B     | POLR1D    | POLD3     | MANEAL   | DCTN5   | COX15   | CFTR    |
| NAPSA   | NOSTRIN | KDM5A     | POU6F1    | POLK      | MAP2     | DCUN1D1 | COX18   | CGGBP1  |
| NCOA7   | NPC1    | KIAA1109  | PPARGC1B  | POU2F1    | MAP3K2   | DDR2    | COX19   | CGN     |
| NEBL    | NPC1L1  | KIAA1143  | PPP1R15B  | PPIG      | MAP3K8   | DDX11   | COX4I1  | CHCHD1  |
| NEDD4L  | NPNT    | KIAA1217  | PPP1R3C   | PPM1H     | MAP6D1   | DDX19B  | COX5A   | CHCHD3  |
| NEK6    | NPY6R   | KIAA1324  | PPP1R3E   | PPP1R15B  | MAPK4    | DDX26B  | CPD     | CHCHD7  |
| NEXN    | NR1D2   | KIAA1328  | PPP1R9A   | PPP1R3C   | MARVELD2 | DDX46   | CPEB2   | CHD1L   |
| NFAT5   | NR1H4   | KIAA1462  | PPTC7     | PPP1R9A   | MARVELD3 | DDX49   | CPEB3   | CHD6    |
| NFATC2  | NR3C1   | KIAA1468  | PRKAA2    | PPP4R4    | MAST4    | DDX51   | CPEB4   | CHD7    |
| NFIA    | NRG4    | KIAA1671  | PRKAB2    | PPTC7     | MBNL1    | DDX54   | CPLX1   | CHD9    |
| NFIB    | NRSN1   | KIAA1683  | PRLR      | PRDM16    | MBNL3    | DDX55   | CPLX2   | CHIC1   |
| NFIC    | NTN4    | KIAA2022  | PRODH2    | PRKAA1    | MBOAT1   | DEAF1   | CPLX3   | CHID1   |
| NFKBIA  | NTRK2   | KIAA2026  | PROM2     | PRKAA2    | MBP      | DEF8    | CPNE4   | CHL1    |
| NFKBIZ  | NUMB    | KIDINS220 | PROX1     | PRKCG     | MCL1     | DEFB119 | CPNE5   | CHM     |
| NIPAL2  | NUP214  | KIF12     | PRPS2     | PROM2     | MCOLN3   | DENND1A | CPNE8   | CHML    |
| NIPBL   | OAF     | KIF1B     | PRRG4     | PROX1     | MCTP2    | DENND2C | CPSF2   | CHMP4B  |
| NLK     | OAS3    | KIF27     | PSD4      | PRRG4     | MDM4     | DENND4C | CPSF3   | CHMP4C  |
| NLRC5   | OCLN    | KIF6      | PTER      | PSD4      | ME3      | DFFA    | CPSF6   | CHORDC1 |
| NMD3    | OFD1    | KLB       | PTP4A1    | PTER      | MED13    | DGKE    | CPXM2   | CHPT1   |
| NMNAT3  | OGFRL1  | KLF13     | PTPN22    | PTP4A1    | MED13L   | DGKZ    | CR1     | CHRA C1 |
| NOSTRIN | ONECUT2 | KLF2      | PTPN3     | PTPN2     | MEF2D    | DGUOK   | CRB3    | CHRD L2 |
| NOXA1   | OSMR    | KLF3      | PTPRK     | PTPN3     | MEG3     | DHDDS   | CREB3L2 | CHRM3   |
| NPC1L1  | OTUD1   | KLF6      | PVRL1     | PTPRJ     | MFSD4    | DHRS7   | CREB3L3 | CHST12  |
| NPM2    | OTUD4   | KLF7      | PVRL4     | PTPRK     | MFSD6    | DHTKD1  | CREB3L4 | CHST14  |
| NPNT    | OVOL1   | KLF9      | PXMP4     | PVR       | MFSD9    | DHX36   | CREB5   | CHST2   |
| NR1H4   | P2RX7   | KLHDC10   | PYROXD1   | PVRL4     | MGAT4A   | DHX37   | CREM    | CHST9   |
| NR3C1   | PACS1   | KLHL15    | RAB11FIP1 | PYROXD1   | MGLL     | DIAPH3  | CRIM1   | CHURC1  |
| NRG2    | PAG1    | KLHL24    | RAB11FIP4 | RAB11FIP1 | MGP      | DIDO1   | CRIP3   | CIAO1   |
| NRG4    | PAK3    | KLHL28    | RAB27B    | RAB11FIP4 | MICAL3   | DIP2B   | CRTAP   | CIAPIN1 |
| NRSN1   | PAPD4   | KLHL5     | RAB3D     | RAB21     | MINA     | DIRAS1  | CRTC3   | CIB4    |

|         |         |           |          |          |          |         |           |         |
|---------|---------|-----------|----------|----------|----------|---------|-----------|---------|
| NSMAF   | PAPD5   | KLHL8     | RAB3IP   | RAB3IP   | MITF     | DIRAS2  | CSDE1     | CINP    |
| NT5C1A  | PARD3B  | KLK12     | RAB7A    | RAB7A    | MKNK1    | DIRC2   | CSMD2     | CIRBP   |
| NT5DC3  | PARD6B  | KREMEN1   | RABGAP1L | RABGAP1L | MKNK2    | DIS3L   | CSNK1A1   | CIRH1A  |
| NTN4    | PARP14  | KRTAP3-1  | RALGAPA1 | RALGAPA1 | MLLT4    | DIS3L2  | CSNK1G3   | CISH    |
| NTRK2   | PARP6   | KRTAP4-12 | RALGAPA2 | RALGAPA2 | MLLT6    | DISC1   | CST3      | CITED4  |
| NUCB2   | PARP9   | KSR1      | RALGPS1  | RALGPS1  | MLXIP    | DISP1   | CSTF2     | CKAP2   |
| NUMB    | PARVA   | KSR2      | RAP1A    | RAP1A    | MLYCD    | DISP2   | CSTF3     | CKAP4   |
| NUP214  | PATL1   | L3MBTL4   | RAPGEF6  | RAPGEF6  | MMAA     | DKK3    | CTAGE5    | CKLF    |
| OAF     | PCDH17  | LAMA3     | RASD1    | RAPH1    | MPP5     | DLC1    | CTHRC1    | CLASP2  |
| OAS2    | PCDH9   | LAMB4     | RASGRP3  | RASA2    | MPP7     | DLG1    | CTNNA3    | CLCN4   |
| OBFC1   | PCGF5   | LAMP2     | RASL11A  | RASAL2   | MPZL3    | DLG2    | CTNNB1    | CLDN1   |
| OCLN    | PCM1    | LANCL2    | RASSF9   | RASD1    | MR1      | DLGAP4  | CTSC      | CLDN12  |
| OFD1    | PCNXL2  | LARP1     | RBM14    | RASGRP3  | MTBP     | DLK1    | CTSS      | CLDN23  |
| OGFRL1  | PDCD6IP | LARP1B    | RBM25    | RASSF5   | MTDH     | DMD     | CTTNBP2NL | CLDN6   |
| OGT     | PDE1C   | LATS1     | RBM47    | RASSF8   | MTF1     | DNAH1   | CUL4A     | CLDND1  |
| OSBPL7  | PDE3A   | LATS2     | RBP1     | RASSF9   | MTHFD2L  | DNAH5   | CUL5      | CLEC14A |
| OSMR    | PDE5A   | LCA5      | RBPJ     | RBBP9    | MTHFR    | DNAH7   | CUX1      | CLEC2D  |
| OTUD1   | PDE7B   | LCA5L     | RC3H1    | RBM39    | MTMR12   | DNAJA4  | CWC15     | CLEC3A  |
| OTUD4   | PDE8A   | LCOR      | RCAN3    | RBM47    | MTMR3    | DNAJC1  | CXADR     | CLEC7A  |
| OVOL1   | PDE8B   | LCP2      | RCL1     | RBP1     | MTMR7    | DNAJC10 | CXCL16    | CLIC6   |
| P2RX7   | PDGFC   | LENG8     | RCOR3    | RC3H1    | MTPAP    | DNAJC18 | CXCL17    | CLINT1  |
| PACS1   | PDGFD   | LEPROT    | REEP6    | RCAN3    | MTR      | DNAJC3  | CXCL2     | CLIP1   |
| PACSIN2 | PDLIM3  | LGR4      | REG3A    | RDH13    | MTUS1    | DNAJC4  | CXXC4     | CLIP3   |
| PAG1    | PDLIM5  | LIFR      | REG3G    | REG3A    | MTUS2    | DNAJC5  | CYB5B     | CLIP4   |
| PAK3    | PDZD8   | LIMA1     | REL      | REG3G    | MUC20    | DNAL1   | CYB5D2    | CLK3    |
| PAPD4   | PELI2   | LIMCH1    | RELL1    | REL      | MUC4     | DNAL11  | CYBB      | CLMN    |
| PAPD5   | PGBD4   | LIPH      | REPS2    | RELL1    | MUM1L1   | DNM1L   | CYBRD1    | CLN8    |
| PARD3B  | PHACTR4 | LMAN1     | REV3L    | REPS2    | MXD1     | DNMT3A  | CYCS      | CLNS1A  |
| PARD6B  | PHC3    | LMBRD1    | RFFL     | RERG     | MYADM    | DOCK1   | CYGB      | CLOCK   |
| PARM1   | PHF11   | LMLN      | RGL3     | REV3L    | MYH11    | DOCK4   | CYHR1     | CLPB    |
| PARP14  | PHF20L1 | LMNA      | RHOB     | RFX2     | MYH14    | DOCK8   | CYP2R1    | CLPX    |
| PARP9   | PHF21A  | LMO2      | RIMS1    | RFX7     | MYLK2    | DPF3    | CYP2U1    | CLSTN2  |
| PARVA   | PHLDB2  | LMO3      | RIOK3    | RGL3     | MYO5A    | DPH5    | CYP3A5    | CLTC    |
| PCDH17  | PIK3AP1 | LMO7      | RIPK1    | RHPN2    | MYO5B    | DPP10   | CYP4V2    | CLUAP1  |
| PCGF5   | PITRM1  | LMTK2     | RIPK3    | RIC8B    | MYO7B    | DPP3    | CYP4X1    | CMIP    |
| PCM1    | PKHD1   | LNPEP     | RIPK4    | RICTOR   | MYRIP    | DPP6    | CYYR1     | CMKLR1  |
| PCMTD1  | PLCD4   | LNX1      | RNF144B  | RIOK3    | MYSM1    | DPP8    | D2HGDH    | CMTM1   |
| PCP4L1  | PLCG2   | LNX2      | RNF19A   | RIPK1    | N4BP2L1  | DPY19L2 | DAAM1     | CMTM3   |
| PDE11A  | PLCL1   | LONRF2    | RNF212   | RIPK3    | NAALADL1 | DPY19L4 | DAB2      | CMTM4   |

|         |          |          |          |         |         |          |         |          |
|---------|----------|----------|----------|---------|---------|----------|---------|----------|
| PDE3A   | PLD1     | LOXL4    | RNF217   | RIPK4   | NALCN   | DPYSL3   | DAB2IP  | CMTM6    |
| PDE4D   | PLEKHA2  | LPAR3    | RNF38    | RNF144B | NAPG    | DSC3     | DACH1   | CMTM7    |
| PDE7B   | PLEKHA7  | LPCAT2   | RNPC3    | RNF180  | NAT8L   | DST      | DACH2   | CMTM8    |
| PDE8A   | PLEKHH2  | LPGAT1   | RORA     | RNF19A  | NBEA    | DSTN     | DACT3   | CNBP     |
| PDGFC   | PLK3     | LPP      | RPH3AL   | RNF207  | NCL     | DTD1     | DAD1    | CNDP2    |
| PDLIM3  | PLSCR1   | LPXN     | RPRD2    | RNF212  | NCOA7   | DTNA     | DAP3    | CNIH3    |
| PDLIM5  | PMEPA1   | LRGUK    | RPS15A   | RNF213  | NEBL    | DTWD1    | DBR1    | CNKSR3   |
| PDZD8   | PNPLA8   | LRIG3    | RPS25    | RNF32   | NEDD4L  | DTX1     | DBT     | CNOT2    |
| PELI2   | POLK     | LRP10    | RPS6KB1  | RNF38   | NEDD9   | DTX3     | DCAKD   | CNOT6    |
| PEX5L   | PPARD    | LRRC37A2 | RRAD     | RNPC3   | NEXN    | DTX3L    | DCBLD1  | CNOT6L   |
| PGPEP1  | PPP1R15B | LRRC37A3 | RRBP1    | ROPN1L  | NFAT5   | DUOXA2   | DCBLD2  | CNOT7    |
| PHC3    | PPP1R1B  | LRRC6    | RSBN1    | ROR1    | NFATC2  | DUSP1    | DCDC2   | CNPY3    |
| PHF11   | PPP1R3C  | LRRC7    | SAMD12   | RORA    | NFIA    | DUSP18   | DCLK1   | CNPY4    |
| PHF21A  | PPP1R9A  | LRRC8E   | SAMHD1   | RPS6KB1 | NFIB    | DUSP27   | DCLRE1C | CNRIP1   |
| PHKA1   | PPP4R1L  | LRRFIP1  | SATB1    | RRAD    | NFIC    | DUSP4    | DCN     | CNTLN    |
| PHLDA1  | PPP4R4   | LRRFIP2  | SCAMP2   | RRAGC   | NFIX    | DYNC1LI1 | DCP1A   | CNTN1    |
| PHYHD1  | PPTC7    | LRRK2    | SCAMP5   | RSBN1   | NFKBIA  | DYNC1LI2 | DCP1B   | CNTN2    |
| PHYHIPL | PRDM16   | LTBP2    | SCFD1    | RUNDC3B | NFKBIZ  | DZIP1L   | DCP2    | CNTN3    |
| PIK3AP1 | PREPL    | LTBP3    | SCN7A    | SAMD12  | NIPAL2  | EAF1     | DCTN4   | CNTN4    |
| PIP5KL1 | PRKAA1   | LTBR     | SCN9A    | SART3   | NIPBL   | EBF1     | DCTN5   | CNTN5    |
| PITPNM2 | PRKAA2   | LYNX1    | SDK1     | SATB1   | NKAPL   | EBF3     | DCUN1D1 | CNTNAP3  |
| PITRM1  | PRKCE    | LYPD6B   | SEC11C   | SCAMP2  | NLK     | EBP      | DDA1    | CNTROB   |
| PIWIL2  | PRKCH    | LZTFL1   | SEC16B   | SCD5    | NLRC5   | EBPL     | DDI1    | COBLL1   |
| PKHD1   | PROM2    | MACC1    | SEC24A   | SCN8A   | NMNAT3  | ECE2     | DDR2    | COG1     |
| PLA2G4F | PROX1    | MACF1    | SEC61B   | SCN9A   | NOB1    | EDC3     | DDX11   | COG2     |
| PLCXD3  | PRRG4    | MAFB     | SEC62    | SEC11C  | NOL10   | EDEM3    | DDX17   | COG3     |
| PLD1    | PSD4     | MAGI1    | SEC63    | SEC24A  | NOP58   | EDIL3    | DDX19B  | COG5     |
| PLEKHA7 | PSEN1    | MAGI3    | SEMA4A   | SEMA4A  | NOSTRIN | EDN1     | DDX26B  | COG6     |
| PLEKHG3 | PTER     | MAGIX    | SEMA4D   | SEMA4D  | NPC1    | EEA1     | DDX31   | COL12A1  |
| PLEKHH1 | PTP4A1   | MAL2     | SERINC2  | SEMA6A  | NPNT    | EEF1A1   | DDX46   | COL1A2   |
| PLEKHH2 | PTPN2    | MALAT1   | SERPINB1 | SERINC2 | NR1H4   | EEF2     | DDX49   | COL20A1  |
| PLK3    | PTPN21   | MAML2    | SETBP1   | SERTAD1 | NR3C1   | EFCAB6   | DEAF1   | COL23A1  |
| PLXNA2  | PTPN3    | MAP3K1   | SFMBT1   | SETBP1  | NRG2    | EFCAB7   | DEF8    | COL27A1  |
| PM20D2  | PTPRK    | MAP3K2   | SFPQ     | SETX    | NRG4    | EFEMP1   | DENND1A | COL3A1   |
| PNPLA7  | PVR      | MAP3K8   | SFT2D2   | SFMBT1  | NRIP3   | EFHB     | DENND2C | COL4A3BP |
| PNPLA8  | PVRL4    | MAPK9    | SGK2     | SFPQ    | NRSN1   | EFHC1    | DENND4C | COL8A1   |
| POLK    | PXK      | MARVELD2 | SGMS2    | SFT2D2  | NRXN3   | EFHD2    | DEPDC7  | COMMD1   |
| PPARD   | PYGO1    | MAST4    | SGSM1    | SGMS2   | NSMAF   | EFTUD2   | DERL1   | COMMD2   |
| PPM1K   | PYROXD1  | MBD6     | SH3RF1   | SGSM1   | NT5C1A  | EGLN2    | DERL2   | COMMD6   |

|           |           |         |          |          |         |           |         |         |
|-----------|-----------|---------|----------|----------|---------|-----------|---------|---------|
| PPP1R15B  | RAB11FIP1 | MBNL1   | SHANK2   | SH3BGRL2 | NT5DC3  | EGLN3     | DFFA    | COMMD7  |
| PPP1R3C   | RAB21     | MBOAT1  | SIN3A    | SH3RF1   | NTN1    | EGR4      | DGKE    | COPB1   |
| PPP1R3E   | RAB27B    | MBP     | SIPA1L1  | SHANK2   | NTN4    | EHD3      | DGUOK   | COPB2   |
| PPP1R9A   | RAB3IP    | MCEE    | SIPA1L3  | SHISA2   | NTRK2   | EHMT1     | DHRS13  | COPS7B  |
| PPTC7     | RAB7A     | MCL1    | SIX4     | SHROOM3  | NUCB2   | EHMT2     | DHTKD1  | COPS8   |
| PRDM1     | RAI1      | MCOLN3  | SLAIN1   | SIPA1L1  | NUDT6   | EID2      | DHX36   | COPZ1   |
| PRDM16    | RALGAPA1  | MCTP2   | SLC11A1  | SIPA1L3  | NUP153  | EID2B     | DHX40   | COPZ2   |
| PRELP     | RALGAPA2  | MDM2    | SLC12A2  | SLAIN1   | NUP214  | EIF1B     | DHX57   | COQ10A  |
| PRKAB2    | RALGAPB   | MDM4    | SLC13A3  | SLC12A2  | OAF     | EIF2A     | DIAPH3  | COQ2    |
| PRKCE     | RAP1A     | ME3     | SLC16A10 | SLC15A2  | OAS3    | EIF2AK2   | DIDO1   | COQ4    |
| PRKCH     | RAPGEF2   | MED10   | SLC16A7  | SLC15A4  | OCLN    | EIF3B     | DIP2A   | COQ9    |
| PRLR      | RAPGEF6   | MED13   | SLC1A2   | SLC16A10 | OFD1    | EIF3C     | DIP2B   | CORO1C  |
| PROM2     | RAPH1     | MED13L  | SLC1A4   | SLC16A7  | OGFRL1  | EIF3D     | DIRAS1  | CORO2A  |
| PROX1     | RASD1     | MED23   | SLC20A1  | SLC16A9  | OGT     | EIF4E     | DIRAS2  | COTL1   |
| PRRC1     | RASEF     | MEF2A   | SLC22A23 | SLC19A3  | OLA1    | EIF4E2    | DIS3    | COX15   |
| PRRG4     | RASGRP3   | MEF2D   | SLC22A5  | SLC22A23 | ONECUT2 | EIF4ENIF1 | DIS3L2  | COX18   |
| PSD4      | RASSF5    | MEG3    | SLC25A25 | SLC22A5  | OSBP2   | EIF4G2    | DISC1   | COX19   |
| PTEN      | RASSF6    | METTL7A | SLC25A27 | SLC23A1  | OSMR    | EIF5A2    | DISP2   | COX411  |
| PTER      | RASSF8    | MFI2    | SLC25A36 | SLC25A25 | OTUD1   | ELAVL1    | DKK2    | COX5A   |
| PTP4A1    | RASSF9    | MFSD4   | SLC25A45 | SLC28A3  | OTUD4   | ELAVL2    | DKK3    | CP      |
| PTPN22    | RBM39     | MFSD6   | SLC28A3  | SLC30A4  | OTUD7A  | ELAVL4    | DLG1    | CPD     |
| PTPN3     | RBM47     | MFSD9   | SLC30A4  | SLC37A1  | PACSIN2 | ELF3      | DLG2    | CPEB2   |
| PTPRB     | RBMS2     | MGAT4A  | SLC30A8  | SLC38A11 | PAK3    | ELL2      | DLGAP4  | CPEB3   |
| PTPRK     | RBMS3     | MGLL    | SLC33A1  | SLC3A1   | PALMD   | ELMOD2    | DLK1    | CPEB4   |
| PURA      | RBP1      | MGST3   | SLC35E1  | SLC41A1  | PAPD4   | ELOF1     | DLL1    | CPLX1   |
| PVR       | RC3H1     | MICAL2  | SLC35F3  | SLC41A2  | PAPD5   | ELOVL6    | DLL3    | CPLX2   |
| PVRL4     | RCAN3     | MICAL3  | SLC35F5  | SLC44A3  | PAQR5   | ELP2      | DLL4    | CPLX3   |
| PXK       | RCOR1     | MICALL2 | SLC37A1  | SLC9A7   | PARD3B  | EMCN      | DMD     | CPNE4   |
| PXMP4     | RCOR3     | MINA    | SLC38A11 | SLCO3A1  | PARD6B  | EMILIN3   | DMGDH   | CPNE5   |
| PYROXD1   | REG3G     | MITF    | SLC38A5  | SLCO5A1  | PARM1   | EML4      | DMRTA1  | CPNE8   |
| RAB11FIP1 | REL       | MKNK1   | SLC39A5  | SLMAP    | PARP14  | EMP1      | DMXL1   | CPSF2   |
| RAB27B    | RELL1     | MKNK2   | SLC39A8  | SMARCA2  | PARP9   | ENAH      | DNAH2   | CPSF3   |
| RAB30     | RERG      | MLLT4   | SLC41A1  | SMC5     | PATL1   | ENPP5     | DNAH5   | CPSF6   |
| RAB3D     | REV3L     | MLLT6   | SLC41A2  | SNIP1    | PCGF5   | ENSA      | DNAH7   | CPXM2   |
| RAB7A     | RFX2      | MLXIP   | SLC44A3  | SNX25    | PCM1    | ENTPD7    | DNAJA4  | CR1     |
| RABGAP1L  | RGL3      | MLYCD   | SLC7A2   | SNX9     | PCMTD1  | ENY2      | DNAJC10 | CRAMP1L |
| RALGAPA1  | RHBDF1    | MMAA    | SLC9A7   | SOAT1    | PCNXL2  | EPB41     | DNAJC12 | CRB1    |
| RALGAPA2  | RHOB      | MON2    | SLCO5A1  | SON      | PDE11A  | EPB41L1   | DNAJC14 | CRB3    |
| RAP1A     | RHOBTB3   | MPP5    | SLFN11   | SORBS2   | PDE12   | EPB41L4B  | DNAJC18 | CRBN    |

|         |         |         |           |         |         |         |         |           |
|---------|---------|---------|-----------|---------|---------|---------|---------|-----------|
| RAPGEF6 | RHOV    | MPP7    | SLITRK1   | SOX6    | PDE1C   | EPB41L5 | DNAJC19 | CREB3L2   |
| RASD1   | RHPN2   | MPZL2   | SMARCA2   | SP100   | PDE3A   | EPC2    | DNAJC21 | CREB3L3   |
| RASEF   | RIC8B   | MPZL3   | SMC5      | SP110   | PDE7B   | EPDR1   | DNAL1   | CREB3L4   |
| RASGRP3 | RICTOR  | MS4A1   | SMCHD1    | SP140L  | PDE8A   | EPHA1   | DNALI1  | CREB5     |
| RASIP1  | RIN2    | MSRA    | SNTB1     | SP2     | PDE8B   | EPHA4   | DNER    | CREBBP    |
| RASSF6  | RIOK3   | MTDH    | SOAT1     | SP4     | PDGFC   | EPSTI1  | DNM1L   | CREBZF    |
| RASSF9  | RIPK3   | MTF1    | SOCS7     | SPAG17  | PDGFD   | ERBB3   | DNMT3A  | CREM      |
| RBM39   | RIPK4   | MTHFD2L | SORBS1    | SPATA13 | PDK4    | ERBB4   | DNTTIP1 | CRIM1     |
| RBMS3   | RNASEL  | MTHFR   | SORBS2    | SPATA5  | PDLIM5  | ERC1    | DOCK1   | CRIP3     |
| RBP1    | RNF144B | MTMR3   | SP100     | SPEF2   | PDZD8   | ERCC4   | DOCK11  | CRIPAK    |
| RC3H1   | RNF149  | MTR     | SP110     | SPG11   | PELI2   | ERF     | DOCK4   | CRTAP     |
| RCAN3   | RNF180  | MTUS1   | SP140L    | SPINT1  | PEX5L   | ERG     | DOCK7   | CRTC2     |
| RCL1    | RNF19A  | MTUS2   | SP2       | SPIRE1  | PGBD4   | ERGIC1  | DOCK8   | CRTC3     |
| RCOR3   | RNF207  | MUC20   | SP4       | SPNS2   | PGPEP1  | ERGIC2  | DOK6    | CSDE1     |
| RDX     | RNF213  | MUC4    | SPATA13   | SPOPL   | PHACTR1 | ERH     | DOT1L   | CSMD2     |
| REG3G   | RNF217  | MUM1L1  | SPATA5    | SPRR3   | PHACTR4 | ERLIN2  | DPCR1   | CSNK1A1   |
| REG4    | RNF32   | MXD1    | SPEF2     | SPSB1   | PHC3    | ERMN    | DPF3    | CSNK1G3   |
| REL     | RNPC3   | MXRA7   | SPG11     | SPTBN1  | PHF11   | ERN2    | DPH3    | CSNK2A2   |
| RELL1   | RORA    | MYADM   | SPINT1    | SPTLC3  | PHF20L1 | ERO1LB  | DPH5    | CSPP1     |
| REPS2   | RORC    | MYH11   | SPPL2A    | SQSTM1  | PHKA1   | ERRFI1  | DPP10   | CST3      |
| RERG    | RPS6KA3 | MYH14   | SPRYD4    | SRGAP1  | PHLDB2  | ESAM    | DPP3    | CSTF2     |
| REV3L   | RPS6KB1 | MYH7B   | SPSB1     | SSPN    | PHYHD1  | ETNK1   | DPP6    | CSTF3     |
| RGL3    | RRAGC   | MYLIP   | SPTLC3    | STAG1   | PHYHIPL | ETS1    | DPPA2   | CTAGE5    |
| RHOB    | RSBN1   | MYLK2   | SQSTM1    | STAM2   | PIGM    | ETS2    | DPY19L2 | CTHRC1    |
| RHOBTB3 | RSPH3   | MYO15B  | SRGAP1    | STARD13 | PIK3AP1 | ETV6    | DPY19L3 | CTNNA3    |
| RHOV    | RUNX2   | MYO1C   | SRPRB     | STEAP2  | PIP5KL1 | ETV7    | DPY19L4 | CTNNB1    |
| RICTOR  | S100A10 | MYO5B   | SSFA2     | STK33   | PITRM1  | EVL     | DPYSL3  | CTPS2     |
| RILP    | S100A6  | MYRIP   | ST6GALNAC | STOX2   | PIWIL4  | EVX1    | DSC2    | CTSC      |
| RIMS1   | SAMD12  | MYSM1   | 4         | STX11   | PLA2G16 | EWSR1   | DSC3    | CTSS      |
| RIN2    | SATB1   | MYT1L   | ST7L      | SULT1C2 | PLCD4   | EXOC2   | DSEL    | CTTNBP2   |
| RIOK1   | SCAMP2  | N4BP2L1 | STAM2     | SYNE1   | PLCG2   | EXOC3   | DST     | CTTNBP2NL |
| RIOK3   | SCARB2  | NALCN   | STARD10   | SYNE2   | PLD1    | EXOC5   | DSTN    | CUL4A     |
| RIPK3   | SCD5    | NAPG    | STARD13   | SYNGR2  | PLEKHA2 | EXOC6   | DTNA    | CUL5      |
| RIPK4   | SCML1   | NAPSA   | STAT3     | SYNJ2   | PLEKHA7 | EXOC8   | DTNBP1  | CUX1      |
| RNF144B | SCN9A   | NCOA7   | STEAP2    | SYT6    | PLEKHH1 | EXOSC6  | DTWD1   | CWC15     |
| RNF149  | SCNN1G  | NEBL    | STOX2     | SYT8    | PLEKHH2 | F2RL2   | DTX1    | CXADR     |
| RNF180  | SCYL2   | NEDD4L  | STX11     | TACC1   | PLK3    | F7      | DTX3    | CXCL16    |
| RNF19A  | SDCCAG8 | NEDD9   | STXBP5    | TAF9B   | PLSCR1  | FADS2   | DTX3L   | CXCL17    |
| RNF212  | SEC14L2 | NEK6    | STXBP6    | TANC2   | PLSCR2  | FAF1    | DUOXA2  | CXCL2     |

|         |          |         |          |          |          |           |         |          |
|---------|----------|---------|----------|----------|----------|-----------|---------|----------|
| RNF213  | SEC24A   | NEXN    | SUSD4    | TANK     | PMEP A1  | FAHD2A    | DUSP1   | CXXC4    |
| RNF216  | SEMA4A   | NFAT5   | SYCP2    | TASP1    | PNPLA7   | FAM101B   | DUSP27  | CXXC5    |
| RNF217  | SEN P7   | NFATC2  | SYNE1    | TBC1D15  | PNPLA8   | FAM102A   | DYM     | CYB561D1 |
| RNF32   | SERINC2  | NFIA    | SYNE2    | TBC1D23  | PODN     | FAM102B   | DYNC1H1 | CYB5B    |
| RNFT1   | SERPINA1 | NFIB    | SYNGR2   | TC2N     | POLD3    | FAM104A   | DYNLRB2 | CYB5D2   |
| RNPC3   | SERTAD1  | NFIC    | SYNPO2   | TCEA3    | POLK     | FAM104B   | DZIP1L  | CYB5R4   |
| RORA    | SETBP1   | NFKBIA  | SYS1     | TDRD9    | POLR1D   | FAM105A   | EAF1    | CYBA     |
| RORC    | SETD7    | NFKBIZ  | SYT8     | TES      | POU2F1   | FAM109B   | EARS2   | CYBB     |
| RPH3AL  | SETX     | NIPAL2  | SYTL1    | TESC     | POU6F1   | FAM110A   | EBF1    | CYBRD1   |
| RPS15A  | SFT2D2   | NIPBL   | TACC1    | TET2     | PPARGC1B | FAM110B   | EBF3    | CYCS     |
| RPS25   | SGK2     | NKTR    | TAF4B    | THBS1    | PPIG     | FAM110C   | ECE2    | CYGB     |
| RPS6KB1 | SGMS2    | NLK     | TAF9B    | THRB     | PPM1H    | FAM114A1  | ECHDC2  | CYHR1    |
| RRBP1   | SH3BGRL2 | NLRC5   | TASP1    | TJP2     | PPP1R15B | FAM120AOS | ECT2    | CYP19A1  |
| RREB1   | SH3RF1   | NMD3    | TBC1D15  | TLK1     | PPP1R3C  | FAM120C   | EDC3    | CYP26B1  |
| RSBN1   | SH3RF3   | NMNAT3  | TBC1D23  | TLR3     | PPP1R3E  | FAM131A   | EDEM3   | CYP2R1   |
| RSPH3   | SH3TC1   | NOSTRIN | TC2N     | TM4SF1   | PPP1R9A  | FAM131C   | EDIL3   | CYP2S1   |
| RUNX2   | SHANK2   | NOXA1   | TCEA3    | TMC4     | PPP4R4   | FAM133A   | EDN1    | CYP2U1   |
| S100A6  | SHROOM3  | NPC1    | TESC     | TMC5     | PPTC7    | FAM135A   | EEA1    | CYP3A5   |
| SAMHD1  | SIPA1L3  | NPC1L1  | TET2     | TMCO4    | PRDM16   | FAM135B   | EEF1A1  | CYP4V2   |
| SAR1B   | SLAIN2   | NPM2    | TEX11    | TMEM106A | PRKAA1   | FAM149B1  | EEF2    | CYP4X1   |
| SATB1   | SLC12A2  | NPNT    | TGFBRAP1 | TMEM107  | PRKAA2   | FAM20A    | EFCAB1  | CYYR1    |
| SCAMP2  | SLC14A1  | NPY6R   | THAP2    | TMEM127  | PRKAB2   | FAM26F    | EFCAB7  | D2HGDH   |
| SCAMP5  | SLC15A2  | NR1D2   | THBS1    | TMEM139  | PRKCG    | FAM60A    | EFHB    | DAAM1    |
| SCARB2  | SLC15A4  | NR1H4   | THRB     | TMEM144  | PRLR     | FAM65A    | EFHC1   | DAB2     |
| SCD5    | SLC16A7  | NR3C1   | TIFA     | TMEM163  | PRODH2   | FAM71F1   | EFHD2   | DAB2IP   |
| SCML1   | SLC22A5  | NRG2    | TIRAP    | TMEM171  | PROM2    | FAM73B    | EFNA5   | DACH1    |
| SCN7A   | SLC23A1  | NRG4    | TLK1     | TMEM184A | PROX1    | FAM76A    | EFTUD2  | DACH2    |
| SCN9A   | SLC25A25 | NRSN1   | TLR3     | TMEM217  | PRPS2    | FAM76B    | EGFR    | DACT3    |
| SDCCAG8 | SLC25A30 | NSMAF   | TM4SF1   | TMEM232  | PRRG4    | FAM81B    | EGLN1   | DAD1     |
| SDK1    | SLC25A45 | NT5C1A  | TMBIM4   | TMEM27   | PSD4     | FAM83F    | EGLN2   | DAP3     |
| SEC16B  | SLC2A9   | NT5DC3  | TMC4     | TMEM41A  | PTER     | FAM84B    | EGLN3   | DAPL1    |
| SEC24A  | SLC30A4  | NTN4    | TMCO4    | TMEM56   | PTP4A1   | FAM91A1   | EGR1    | DAZAP2   |
| SEC61A1 | SLC35F5  | NTRK2   | TMED10   | TMEM62   | PTPN2    | FAM98A    | EGR4    | DBR1     |
| SEC61B  | SLC38A11 | NUCB2   | TMEM106A | TMEM86A  | PTPN22   | FANCF     | EHD3    | DBT      |
| SEC62   | SLC3A1   | NUMB    | TMEM127  | TMF1     | PTPN3    | FARP2     | EHD4    | DCAKD    |
| SEC63   | SLC40A1  | NUP214  | TMEM131  | TMPRSS13 | PTPRJ    | FAT3      | EHF     | DCBLD1   |
| SEMA4A  | SLC41A1  | OAF     | TMEM144  | TMPRSS3  | PTPRK    | FBRS      | EID2    | DCBLD2   |
| SEPP1   | SLC41A2  | OAS2    | TMEM163  | TNFRSF11 | PVR      | FBXL16    | EID2B   | DCDC2    |
| SERINC2 | SLC44A3  | OAS3    | TMEM184A | A        | PVRL1    | FBXL17    | EIF1    | DCLK1    |



|          |         |         |          |          |           |          |          |         |
|----------|---------|---------|----------|----------|-----------|----------|----------|---------|
| SERPINA1 | SLC5A9  | OBFC1   | TMEM220  | TNFSF15  | PVRL4     | FBXL3    | EIF1B    | DCLRE1C |
| SERPINB1 | SLC7A2  | OCLN    | TMEM232  | TNIP1    | PXMP4     | FBXO10   | EIF2A    | DCN     |
| SERPINB6 | SLC9A7  | OFD1    | TMEM41A  | TNRC6B   | PYROXD1   | FBXO15   | EIF2AK3  | DCP1A   |
| SERTAD1  | SLMAP   | OGFRL1  | TMEM52   | TOM1L1   | RAB11FIP1 | FBXO16   | EIF3E    | DCP1B   |
| SETBP1   | SMARCA2 | OGT     | TMEM56   | TOR1AIP1 | RAB11FIP4 | FBXO3    | EIF3F    | DGP2    |
| SETD7    | SMC5    | ONECUT2 | TMEM57   | TOR1AIP2 | RAB21     | FBXO30   | EIF3H    | DCST2   |
| SFT2D2   | SNX25   | OSBPL7  | TMEM62   | TP53INP2 | RAB27B    | FBXO33   | EIF3K    | DCTN2   |
| SGK2     | SNX9    | OSMR    | TMEM86A  | TPD52    | RAB3D     | FBXO36   | EIF3M    | DCTN4   |
| SGMS2    | SOAT1   | OTUD1   | TMF1     | TPPP     | RAB3IP    | FBXO38   | EIF4E    | DCTN5   |
| SGSM1    | SORBS2  | OTUD4   | TMPRSS13 | TRAF1    | RAB7A     | FBXO5    | EIF4E2   | DCUN1D1 |
| SH3BP4   | SORCS1  | OVOL1   | TNIP1    | TRAF6    | RABGAP1L  | FBXO6    | EIF4E3   | DDA1    |
| SH3RF1   | SOS1    | P2RX7   | TNS3     | TRIB1    | RALGAPA1  | FBXO7    | EIF4EBP2 | DDI1    |
| SH3TC1   | SOS2    | PACS1   | TOM1L1   | TRIM38   | RALGAPA2  | FBXO8    | ELAC1    | DDR2    |
| SLAIN2   | SOX6    | PACIN2  | TOR1AIP1 | TRIM56   | RALGPS1   | FBXO9    | ELAVL1   | DDX11   |
| SLC10A7  | SP100   | PAG1    | TOR1AIP2 | TRIM9    | RAP1A     | FBXW7    | ELAVL2   | DDX17   |
| SLC12A2  | SP110   | PAK3    | TOX3     | TRIO     | RAPGEF6   | FCHSD1   | ELAVL4   | DDX19B  |
| SLC16A10 | SP140L  | PAPD4   | TP53INP1 | TRIP11   | RAPH1     | FCRLB    | ELF2     | DDX26B  |
| SLC16A7  | SPAG9   | PAPD5   | TPD52    | TRNP1    | RASA2     | FDX1L    | ELF3     | DDX31   |
| SLC1A2   | SPATA13 | PARD3B  | TRIB1    | TRPM5    | RASAL2    | FGD5     | ELL2     | DDX46   |
| SLC1A4   | SPATA5  | PARD6B  | TRIM2    | TSC22D2  | RASD1     | FGD6     | ELMOD2   | DDX49   |
| SLC20A1  | SPEF2   | PARM1   | TRIM25   | TSGA10   | RASGRP3   | FGF14    | ELOF1    | DDX51   |
| SLC22A5  | SPG11   | PARP14  | TRIM36   | TTC21A   | RASL11A   | FGF9     | ELOVL6   | DDX54   |
| SLC25A25 | SPINT1  | PARP6   | TRIM38   | TTC22    | RASSF5    | FGFBP3   | ELOVL7   | DDX55   |
| SLC25A27 | SPIRE1  | PARP9   | TRIM50   | TTC39C   | RASSF8    | FGFR1    | ELP2     | DEAF1   |
| SLC25A36 | SPNS2   | PARVA   | TRIM56   | TTLL7    | RASSF9    | FGFR1OP2 | ELP3     | DEF8    |
| SLC25A45 | SPNS3   | PATL1   | TRIM7    | TTN      | RBBP9     | FGFR2    | EMCN     | DEFB119 |
| SLC26A7  | SPOPL   | PCDH17  | TRIP11   | TULP4    | RBM14     | FGGY     | EMILIN2  | DENND1A |
| SLC2A13  | SPRR3   | PCDH9   | TRPM6    | TXNDC11  | RBM25     | FIGN     | EMILIN3  | DENND2C |
| SLC2A9   | SPSB1   | PCGF5   | TSC22D2  | UBN2     | RBM39     | FILIP1   | EML4     | DENND4C |
| SLC30A2  | SPTBN1  | PCM1    | TSPAN33  | UBR3     | RBM47     | FKBP11   | EMP1     | DEPDC7  |
| SLC30A4  | SPTLC3  | PCMTD1  | TSTD1    | UBXN2B   | RBP1      | FKBP15   | EMP2     | DERL1   |
| SLC33A1  | SQSTM1  | PCNXL2  | TTC17    | UCA1     | RBPJ      | FKBP5    | ENAH     | DERL2   |
| SLC35D2  | SRGAP1  | PCP4L1  | TTC21A   | UFM1     | RC3H1     | FKBP7    | ENAM     | DDFA    |
| SLC35E1  | SSFA2   | PDCD6IP | TTC22    | UGCG     | RCAN3     | FLCN     | ENPP1    | DGKE    |
| SLC35F5  | SSH2    | PDE11A  | TTC27    | UGT8     | RCL1      | FLI1     | ENTPD7   | DGKZ    |
| SLC38A11 | SSPN    | PDE1C   | TTC39C   | UHMK1    | RCOR3     | FLRT3    | EP400    | DGUOK   |
| SLC39A5  | ST3GAL1 | PDE3A   | TTLL11   | ULK4     | RDH13     | FLT1     | EPB41L1  | DHDDS   |
| SLC39A8  | STAM2   | PDE4D   | TTLL7    | UNC13D   | REEP6     | FLVCR1   | EPB41L2  | DHRS13  |
| SLC40A1  | STARD13 | PDE5A   | TTN      | USP16    | REG3A     | FLYWCH2  | EPB41L4A | DHRS7   |

|           |         |         |         |         |         |         |          |         |
|-----------|---------|---------|---------|---------|---------|---------|----------|---------|
| SLC41A1   | STK17B  | PDE7B   | TTYH2   | USP2    | REG3G   | FMN1    | EPB41L4B | DHTKD1  |
| SLC41A2   | STK31   | PDE8A   | TULP4   | USP24   | REL     | FMN2    | EPC1     | DHX36   |
| SLC44A3   | STK32A  | PDE8B   | TWISTNB | USP3    | RELL1   | FMNL3   | EPC2     | DHX37   |
| SLC46A1   | STX3    | PDGFC   | TXNDC11 | USP31   | REPS2   | FNDC3A  | EPDR1    | DHX40   |
| SLC7A2    | STX4    | PDGFD   | U2AF1   | USP34   | RERG    | FNDC7   | EPHA1    | DHX57   |
| SLITRK1   | STXBP5  | PDLIM3  | UBE2D3  | USP36   | REV3L   | FNIP1   | EPHA10   | DIAPH3  |
| SMAP2     | SUSD1   | PDLIM5  | UBE4B   | USP38   | RFFL    | FNTA    | EPHA4    | DIDO1   |
| SMARCA2   | SV2B    | PDZD8   | UBIAD1  | USP43   | RFX2    | FOLR2   | EPSTI1   | DIP2A   |
| SMC5      | SVEP1   | PELI2   | UBN2    | USP47   | RFX7    | FOXA3   | ERAP2    | DIP2B   |
| SMCHD1    | SYK     | PEX5L   | UBXN2B  | USP9X   | RGL3    | FOXK2   | ERBB2    | DIRAS1  |
| SNTB1     | SYNE1   | PGBD4   | UFM1    | VAV3    | RHOB    | FOXN3   | ERBB3    | DIRAS2  |
| SNX14     | SYNE2   | PGPEP1  | UGCG    | VEPH1   | RHPN2   | FOXO1   | ERBB4    | DIRC2   |
| SOAT1     | SYNGR2  | PHACTR4 | UGT8    | VGLL3   | RIC8B   | FOXP2   | ERC1     | DIS3    |
| SORBS1    | SYNJ1   | PHC3    | ULBP2   | VIL1    | RICTOR  | FOXP3   | ERCC4    | DIS3L   |
| SORBS2    | SYNJ2   | PHF11   | ULK4    | VPS13B  | RIMS1   | FOXP4   | ERF      | DIS3L2  |
| SOX6      | SYNPO   | PHF20L1 | UNC13D  | VPS13C  | RIOK3   | FOXQ1   | ERG      | DISC1   |
| SP100     | SYTL4   | PHF21A  | USP16   | WAC     | RIPK1   | FOXRED2 | ERGIC1   | DISP1   |
| SP110     | TACC1   | PHKA1   | USP2    | WDFY3   | RIPK3   | FPR3    | ERGIC2   | DISP2   |
| SP2       | TACSTD2 | PHLDA1  | USP3    | WDR44   | RIPK4   | FRAS1   | ERICH1   | DKK2    |
| SPACA3    | TAF1    | PHLDB2  | USP30   | WDR66   | RNF144B | FRMD4A  | ERLIN2   | DKK3    |
| SPAG9     | TAF9B   | PHYHD1  | USP31   | WDR7    | RNF180  | FRMPD4  | ERMN     | DLC1    |
| SPATA13   | TANC1   | PHYHIPL | USP34   | WDR72   | RNF19A  | FRZB    | ERN1     | DLG1    |
| SPEF2     | TANC2   | PIK3AP1 | USP36   | WFDC3   | RNF207  | FST     | ERO1LB   | DLG2    |
| SPG11     | TANK    | PIP5KL1 | USP38   | WHAMM   | RNF212  | FSTL1   | ERP27    | DLGAP4  |
| SPIRE1    | TAPT1   | PITPNM2 | USP43   | WNK2    | RNF213  | FSTL5   | ERRFI1   | DLK1    |
| SPPL2A    | TASP1   | PITRM1  | USP47   | WNT4    | RNF217  | FUCA1   | ESAM     | DLL1    |
| SPSB1     | TBC1D15 | PIWIL2  | USP9X   | WWC1    | RNF32   | FUK     | ESCO1    | DLL3    |
| SPTBN1    | TBC1D23 | PKHD1   | UTRN    | XDH     | RNF38   | FUNDC1  | ESD      | DLL4    |
| SPTLC3    | TBC1D8B | PLA2G4F | VCPIP1  | XRN1    | RNPC3   | FUT10   | ESRRB    | DMD     |
| SQSTM1    | TC2N    | PLCD4   | VGLL3   | YTHDC1  | ROPN1L  | FXR1    | ETNK1    | DMGDH   |
| SRGAP1    | TCEA3   | PLCG2   | VIL1    | ZBED3   | ROR1    | FXYD5   | ETS1     | DMRTA1  |
| SRPRB     | TES     | PLCL1   | VPS13A  | ZBTB10  | RORA    | FZD1    | ETS2     | DMXL1   |
| SSFA2     | TET2    | PLCXD3  | VPS13C  | ZBTB20  | RPH3AL  | FZD3    | ETV5     | DNAH1   |
| SSH2      | TFCP2L1 | PLD1    | WDFY2   | ZBTB43  | RPRD2   | GAB3    | EVC      | DNAH2   |
| SSPN      | TGFB2   | PLEKHA2 | WDR44   | ZBTB44  | RPS15A  | GABBR1  | EVL      | DNAH5   |
| SSR1      | THBS1   | PLEKHA7 | WDR7    | ZC3H12C | RPS25   | GABPA   | EWSR1    | DNAH7   |
| SSTR1     | THSD4   | PLEKHG3 | WHAMM   | ZCCHC2  | RPS6KB1 | GABPB2  | EXOC3    | DNAJA4  |
| ST3GAL1   | THSD7A  | PLEKHH1 | WNK2    | ZCCHC6  | RRAD    | GABRB3  | EXOC4    | DNAJC1  |
| ST6GALNAC | TLR3    | PLEKHH2 | WNT9A   | ZDHHC14 | RRAGC   | GAD2    | EXOC5    | DNAJC10 |

|         |          |          |         |         |          |            |          |         |
|---------|----------|----------|---------|---------|----------|------------|----------|---------|
| 4       | TM4SF1   | PLK3     | WWC1    | ZFHX3   | RRBP1    | GADD45GIP1 | EXOC6    | DNAJC12 |
| ST7L    | TM4SF18  | PLSCR1   | XAF1    | ZFP28   | RSBN1    | GALNT10    | EXOC8    | DNAJC14 |
| STAM2   | TMC4     | PLXNA2   | XBP1    | ZFP3    | RUNDC3B  | GALNT12    | EXOSC6   | DNAJC18 |
| STARD10 | TMC5     | PM20D2   | XRN1    | ZFX     | SAMD12   | GALNT13    | EXT1     | DNAJC19 |
| STARD13 | TMCC3    | PMEPA1   | YTHDC1  | ZMAT1   | SAMHD1   | GALNT9     | EYA3     | DNAJC21 |
| STIM2   | TMCO4    | PNPLA7   | ZBED3   | ZMYM5   | SART3    | GALT       | F2RL2    | DNAJC3  |
| STK17B  | TMEM106A | PNPLA8   | ZBTB10  | ZNF10   | SATB1    | GAPVD1     | F5       | DNAJC4  |
| STK31   | TMEM107  | POLK     | ZBTB20  | ZNF100  | SCAMP2   | GATA4      | F7       | DNAJC5  |
| STK32A  | TMEM117  | PPARD    | ZBTB43  | ZNF148  | SCAMP5   | GATC       | FAAH2    | DNAL1   |
| STXBP5  | TMEM127  | PPM1K    | ZC3H12C | ZNF207  | SCD5     | GATM       | FADS2    | DNALI1  |
| STXBP6  | TMEM131  | PPP1R15B | ZCCHC2  | ZNF25   | SCFD1    | GBA2       | FAF1     | DNER    |
| SUSD1   | TMEM136  | PPP1R1B  | ZCCHC6  | ZNF350  | SCN7A    | GBP1       | FAM101B  | DNM1L   |
| SUSD2   | TMEM144  | PPP1R3C  | ZCCHC7  | ZNF394  | SCN8A    | GBP2       | FAM102A  | DNMT3A  |
| SUSD4   | TMEM156  | PPP1R3E  | ZDHHC9  | ZNF395  | SCN9A    | GCC2       | FAM102B  | DNTTIP1 |
| SV2B    | TMEM163  | PPP1R9A  | ZFAND2A | ZNF398  | SDK1     | GCLM       | FAM104A  | DOCK1   |
| SVEP1   | TMEM171  | PPP4R1L  | ZFHX3   | ZNF407  | SEC11C   | GCNT1      | FAM105A  | DOCK11  |
| SYCP2   | TMEM184A | PPP4R4   | ZFP3    | ZNF430  | SEC16B   | GDA        | FAM110C  | DOCK4   |
| SYNE1   | TMEM217  | PPTC7    | ZFYVE28 | ZNF431  | SEC24A   | GDAP1      | FAM114A1 | DOCK7   |
| SYNE2   | TMEM27   | PRDM1    | ZMAT1   | ZNF439  | SEC61B   | GDE1       | FAM118B  | DOCK8   |
| SYNGR2  | TMEM30B  | PRDM16   | ZMYM6   | ZNF44   | SEC62    | GDNF       | FAM120C  | DOK6    |
| SYNPO   | TMEM39A  | PRELP    | ZNF10   | ZNF471  | SEC63    | GEMIN5     | FAM122A  | DOT1L   |
| SYS1    | TMEM41A  | PREPL    | ZNF207  | ZNF483  | SEMA4A   | GFM2       | FAM126B  | DPCR1   |
| SYTL1   | TMEM45B  | PRKAA1   | ZNF350  | ZNF493  | SEMA4D   | GFPT1      | FAM129B  | DPF3    |
| SYTL4   | TMEM50B  | PRKAA2   | ZNF385B | ZNF506  | SEMA6A   | GGCX       | FAM131A  | DPH3    |
| TACC1   | TMEM56   | PRKAB2   | ZNF395  | ZNF562  | SERINC2  | GGNBP2     | FAM131C  | DPH5    |
| TACSTD2 | TMEM59   | PRKCE    | ZNF407  | ZNF585B | SERPINB1 | GGT6       | FAM133A  | DPP10   |
| TADA2B  | TMEM62   | PRKCH    | ZNF430  | ZNF595  | SERTAD1  | GGT7       | FAM135A  | DPP3    |
| TAF1    | TMEM86A  | PRLR     | ZNF431  | ZNF600  | SETBP1   | GHDC       | FAM135B  | DPP6    |
| TAF9B   | TMEM88   | PROM2    | ZNF44   | ZNF652  | SETX     | GHRL       | FAM150B  | DPP8    |
| TANC1   | TMEM9B   | PROX1    | ZNF483  | ZNF701  | SFMBT1   | GIGYF2     | FAM19A4  | DPPA2   |
| TANC2   | TMF1     | PRRC1    | ZNF493  | ZNF708  | SFPQ     | GIMAP1     | FAM19A5  | DPY19L2 |
| TANK    | TMPRSS13 | PRRG4    | ZNF506  | ZNF717  | SFT2D2   | GIMAP8     | FAM20A   | DPY19L3 |
| TASP1   | TMPRSS2  | PSD4     | ZNF595  | ZNF721  | SGK2     | GIPC2      | FAM3C    | DPY19L4 |
| TBC1D15 | TMTC2    | PSEN1    | ZNF600  | ZNF75A  | SGMS2    | GIPR       | FAM46C   | DPYSL3  |
| TBC1D23 | TNFRSF11 | PTEN     | ZNF652  | ZNF789  | SGSM1    | GIT2       | FAM58A   | DSC2    |
| TC2N    | A        | PTER     | ZNF655  | ZNF800  | SH3BGRL2 | GJB2       | FAM60A   | DSC3    |
| TCEA3   | TNFSF15  | PTP4A1   | ZNF681  | ZNF827  | SH3RF1   | GJC1       | FAM63A   | DSEL    |
| TEP1    | TNIP1    | PTPN2    | ZNF704  | ZNF844  | SHANK2   | GJD3       | FAM65A   | DST     |
| TES     | TOM1L1   | PTPN21   | ZNF708  | ZNF91   | SHISA2   | GK5        | FAM71E1  | DSTN    |

|          |          |           |        |        |          |         |         |          |
|----------|----------|-----------|--------|--------|----------|---------|---------|----------|
| TESC     | TOM1L2   | PTPN22    | ZNF710 | ZNFX1  | SHROOM3  | GKAP1   | FAM73A  | DTD1     |
| TET2     | TOR1AIP1 | PTPN3     | ZNF717 | ZSWIM1 | SIN3A    | GLCCI1  | FAM76B  | DTNA     |
| TFCP2L1  | TOR1AIP2 | PTPRB     | ZNF800 | ZSWIM6 | SIPA1L1  | GLIS3   | FAM81A  | DTNBP1   |
| TGFBR3   | TPM1     | PTPRK     | ZNF844 | ZXDA   | SIPA1L3  | GLS     | FAM81B  | DTWD1    |
| THAP2    | TRAF1    | PURA      |        |        | SIX4     | GLT1D1  | FAM83B  | DTX1     |
| THBS1    | TRAF3IP3 | PVR       |        |        | SLAIN1   | GLT8D2  | FAM84A  | DTX3     |
| THRB     | TRAF6    | PVRL4     |        |        | SLC11A1  | GLTSCR2 | FAM84B  | DTX3L    |
| TIFA     | TRIB1    | PXK       |        |        | SLC12A2  | GLUL    | FAM92A1 | DUOXA2   |
| TIRAP    | TRIM38   | PXMP4     |        |        | SLC13A3  | GM2A    | FAM98A  | DUSP1    |
| TLR3     | TRIM4    | PYGO1     |        |        | SLC15A2  | GMCL1   | FAM98C  | DUSP18   |
| TM4SF1   | TRIM47   | PYROXD1   |        |        | SLC15A4  | GMDS    | FANCA   | DUSP27   |
| TMBIM4   | TRIM56   | RAB11FIP1 |        |        | SLC16A10 | GMIP    | FANCD2  | DUSP4    |
| TMC4     | TRIM9    | RAB21     |        |        | SLC16A7  | GNA12   | FANCF   | DYM      |
| TMCO4    | TRIO     | RAB27B    |        |        | SLC16A9  | GNA13   | FARP1   | DYNC1H1  |
| TMED10   | TRIP11   | RAB30     |        |        | SLC19A3  | GNAI1   | FARSB   | DYNC1LI1 |
| TMED2    | TRIP12   | RAB3D     |        |        | SLC1A2   | GNAO1   | FASTKD2 | DYNC1LI2 |
| TMED5    | TSC22D2  | RAB3IP    |        |        | SLC1A4   | GNAS    | FAU     | DYNLRB2  |
| TMED6    | TSHZ1    | RAB7A     |        |        | SLC20A1  | GNB4    | FBLIM1  | DZIP1L   |
| TMEM106A | TSHZ2    | RABGAP1L  |        |        | SLC22A23 | GNG11   | FBN1    | EAF1     |
| TMEM117  | TTC21A   | RAI1      |        |        | SLC22A5  | GNG2    | FBXL16  | EARS2    |
| TMEM127  | TTC32    | RALGAPA1  |        |        | SLC23A1  | GNG7    | FBXL19  | EBF1     |
| TMEM131  | TTC39C   | RALGAPA2  |        |        | SLC25A25 | GNG8    | FBXL20  | EBF3     |
| TMEM144  | TTLL7    | RALGAPB   |        |        | SLC25A27 | GNL1    | FBXL4   | EBP      |
| TMEM163  | TTN      | RAP1A     |        |        | SLC25A36 | GNPDA2  | FBXO10  | EBPL     |
| TMEM181  | TULP4    | RAPGEF2   |        |        | SLC25A45 | GNPTAB  | FBXO15  | ECE2     |
| TMEM184A | TXNDC11  | RAPGEF6   |        |        | SLC28A3  | GOLGA3  | FBXO16  | ECHDC2   |
| TMEM25   | UBE2U    | RAPH1     |        |        | SLC30A4  | GOLT1B  | FBXO18  | ECT2     |
| TMEM30B  | UBR3     | RASD1     |        |        | SLC30A8  | GON4L   | FBXO2   | EDC3     |
| TMEM39A  | UCA1     | RASEF     |        |        | SLC33A1  | GOPC    | FBXO22  | EDEM3    |
| TMEM41A  | UFM1     | RASGRP3   |        |        | SLC35E1  | GOSR2   | FBXO3   | EDIL3    |
| TMEM50B  | UGCG     | RASIP1    |        |        | SLC35F3  | GPBP1   | FBXO30  | EDN1     |
| TMEM52   | UHMK1    | RASSF5    |        |        | SLC35F5  | GPC6    | FBXO31  | EEA1     |
| TMEM56   | ULK4     | RASSF6    |        |        | SLC37A1  | GPM6A   | FBXO33  | EEF1A1   |
| TMEM57   | USP16    | RASSF8    |        |        | SLC38A11 | GPR126  | FBXO36  | EEF2     |
| TMEM59   | USP2     | RASSF9    |        |        | SLC38A5  | GPR155  | FBXO38  | EFCAB1   |
| TMEM62   | USP24    | RBM39     |        |        | SLC39A5  | GPR158  | FBXO7   | EFCAB6   |
| TMEM86A  | USP3     | RBM47     |        |        | SLC39A8  | GPR160  | FBXO8   | EFCAB7   |
| TMEM9B   | USP30    | RBMS2     |        |        | SLC3A1   | GPR180  | FBXO9   | EFEMP1   |
| TMF1     | USP31    | RBMS3     |        |        | SLC41A1  | GPR26   | FBXW7   | EFHB     |

|          |         |         |  |  |         |          |          |           |
|----------|---------|---------|--|--|---------|----------|----------|-----------|
| TMPRSS13 | USP34   | RBP1    |  |  | SLC41A2 | GPR39    | FBXW8    | EFHC1     |
| TMPRSS2  | USP36   | RC3H1   |  |  | SLC44A3 | GPR55    | FCAMR    | EFHD2     |
| TNFSF14  | USP38   | RCAN3   |  |  | SLC7A2  | GPR68    | FCHSD1   | EFNA5     |
| TNIP1    | USP43   | RCL1    |  |  | SLC9A7  | GPR98    | FCRLB    | EFTUD2    |
| TNS3     | USP47   | RCOR1   |  |  | SLCO3A1 | GPRC5A   | FDX1L    | EGFR      |
| TOM1L1   | USP53   | RCOR3   |  |  | SLCO5A1 | GPRIN1   | FECH     | EGLN1     |
| TOM1L2   | UTRN    | RDX     |  |  | SLFN11  | GPRIN3   | FEM1A    | EGLN2     |
| TOR1AIP1 | VAV3    | REG3G   |  |  | SLITRK1 | GPSP1    | FER      | EGLN3     |
| TOR1AIP2 | VEPH1   | REG4    |  |  | SLMAP   | GRAMD1A  | FERMT1   | EGR1      |
| TP53INP1 | VGLL3   | REL     |  |  | SMARCA2 | GRAMD3   | FGA      | EGR4      |
| TPM1     | VPS13C  | RELL1   |  |  | SMC5    | GRASP    | FGD3     | EHD3      |
| TRAF3IP3 | VPS37A  | REPS2   |  |  | SMCHD1  | GRIA2    | FGD5     | EHD4      |
| TRAF6    | VPS41   | RERG    |  |  | SNIP1   | GRIA3    | FGD6     | EHF       |
| TRIB1    | WAC     | REV3L   |  |  | SNTB1   | GRIA4    | FGF10    | EHMT1     |
| TRIM25   | WDFY3   | RFX2    |  |  | SNX25   | GRID1    | FGF12    | EHMT2     |
| TRIM38   | WDR19   | RGL3    |  |  | SNX9    | GRIK3    | FGF14    | EID2      |
| TRIM4    | WDR26   | RHBDF1  |  |  | SOAT1   | GRIN2A   | FGF18    | EID2B     |
| TRIM47   | WDR44   | RHOB    |  |  | SOCS7   | GRIN2B   | FGF19    | EIF1      |
| TRIM56   | WDR7    | RHOBTB3 |  |  | SON     | GRIN3A   | FGF9     | EIF1B     |
| TRIP11   | WDR72   | RHOV    |  |  | SORBS1  | GRPEL2   | FGFBP3   | EIF2A     |
| TRPM6    | WHAMM   | RHPN2   |  |  | SORBS2  | GSN      | FGFR1    | EIF2AK2   |
| TSC22D2  | WNK2    | RIC8B   |  |  | SOX6    | GSTA4    | FGFR1OP2 | EIF2AK3   |
| TSHZ1    | WWC1    | RICTOR  |  |  | SP100   | GSTM3    | FGFR2    | EIF3B     |
| TSHZ2    | XDH     | RILP    |  |  | SP110   | GSTT1    | FGGY     | EIF3C     |
| TTC17    | XRN1    | RIMS1   |  |  | SP140L  | GTF2A1   | FHDC1    | EIF3D     |
| TTC21A   | XRRA1   | RIN2    |  |  | SP2     | GTF2H3   | FIGN     | EIF3E     |
| TTC39C   | YPEL2   | RIOK1   |  |  | SP4     | GTF2IRD2 | FILIP1   | EIF3F     |
| TTC7B    | YPEL5   | RIOK3   |  |  | SPAG17  | GTF3C4   | FKBP11   | EIF3H     |
| TTLL11   | YTHDC1  | RIPK3   |  |  | SPATA13 | GTF3C5   | FKBP5    | EIF3K     |
| TTLL7    | ZBTB10  | RIPK4   |  |  | SPATA5  | GTPBP1   | FKBP7    | EIF3M     |
| TTN      | ZBTB20  | RNASEL  |  |  | SPEF2   | GTPBP2   | FKRP     | EIF4E     |
| TTYH2    | ZBTB38  | RNF144B |  |  | SPG11   | GTPBP8   | FLCN     | EIF4E2    |
| TULP4    | ZBTB41  | RNF149  |  |  | SPINT1  | GUCY1A3  | FLI1     | EIF4E3    |
| TWF1     | ZBTB43  | RNF180  |  |  | SPIRE1  | GUF1     | FLT1     | EIF4EBP2  |
| TXNDC11  | ZC3H12C | RNF19A  |  |  | SPNS2   | GUK1     | FLVCR1   | EIF4ENIF1 |
| UBE2D3   | ZCCHC2  | RNF207  |  |  | SPOPL   | H2AFJ    | FLYWCH2  | EIF4G2    |
| UBE2H    | ZCCHC6  | RNF212  |  |  | SPPL2A  | H6PD     | FMN1     | EIF5A2    |
| UBE2J1   | ZDHHC1  | RNF213  |  |  | SPRR3   | HAPLN4   | FMN2     | ELAC1     |
| UBE2U    | ZFHX3   | RNF216  |  |  | SPRYD4  | HARBI1   | FNBP1    | ELAVL1    |

|         |         |         |  |  |           |           |            |          |
|---------|---------|---------|--|--|-----------|-----------|------------|----------|
| UBR3    | ZFP28   | RNF217  |  |  | SPSB1     | HAVCR2    | FNDC3A     | ELAVL2   |
| UFM1    | ZFP3    | RNF32   |  |  | SPTBN1    | HBS1L     | FNIP1      | ELAVL4   |
| UGCG    | ZFX     | RNFT1   |  |  | SPTLC3    | HCFC2     | FNIP2      | ELF2     |
| UGT8    | ZFYVE16 | RNPC3   |  |  | SQSTM1    | HCN3      | FNTA       | ELF3     |
| UHMK1   | ZHX1    | RORA    |  |  | SRGAP1    | HDAC4     | FOLR2      | ELL2     |
| ULK4    | ZMAT1   | RORC    |  |  | SRPRB     | HDAC5     | FOXA1      | ELMOD2   |
| USP16   | ZMYM5   | RPH3AL  |  |  | SSFA2     | HDAC8     | FOXA3      | ELOF1    |
| USP2    | ZMYM6   | RPS15A  |  |  | SSPN      | HDAC9     | FOXK1      | ELOVL6   |
| USP24   | ZMYND15 | RPS25   |  |  | ST6GALNAC | HDDC3     | FOXN3      | ELOVL7   |
| USP3    | ZNF124  | RPS6KA3 |  |  | 4         | HDHD2     | FOXO1      | ELP2     |
| USP30   | ZNF148  | RPS6KB1 |  |  | ST7L      | HDLBP     | FOXP1      | ELP3     |
| USP31   | ZNF175  | RRAGC   |  |  | STAG1     | HEATR5A   | FOXP2      | EMCN     |
| USP34   | ZNF19   | RRBP1   |  |  | STAM2     | HECA      | FOXP4      | EMILIN2  |
| USP36   | ZNF25   | RREB1   |  |  | STARD10   | HECTD1    | FOXQ1      | EMILIN3  |
| USP38   | ZNF264  | RSBN1   |  |  | STARD13   | HECTD2    | FOXR1      | EML4     |
| USP43   | ZNF350  | RSPH3   |  |  | STAT3     | HECW2     | FOXRED2    | EMP1     |
| USP47   | ZNF394  | RUNX2   |  |  | STEAP2    | HERC1     | FPR3       | EMP2     |
| USP53   | ZNF395  | S100A10 |  |  | STK33     | HERPUD2   | FRMD4A     | ENAH     |
| UTRN    | ZNF407  | S100A6  |  |  | STOX2     | HEXA      | FRMD6      | ENAM     |
| VAPA    | ZNF430  | SAMD12  |  |  | STX11     | HFE       | FRMPD4     | ENPP1    |
| VIL1    | ZNF436  | SAMHD1  |  |  | STXBP5    | HGS       | FRS2       | ENPP5    |
| VPS13C  | ZNF44   | SAR1B   |  |  | STXBP6    | HGSNAT    | FRZB       | ENSA     |
| VPS36   | ZNF471  | SATB1   |  |  | SULT1C2   | HHLA2     | FSTL1      | ENTPD7   |
| VPS53   | ZNF506  | SCAMP2  |  |  | SUSD4     | HIAT1     | FSTL5      | ENY2     |
| WDFY2   | ZNF540  | SCAMP5  |  |  | SYCP2     | HIF3A     | FUBP3      | EP400    |
| WDR13   | ZNF555  | SCARB2  |  |  | SYNE1     | HIGD1A    | FUCA1      | EPB41    |
| WDR31   | ZNF585B | SCD5    |  |  | SYNE2     | HINT1     | FUNDC1     | EPB41L1  |
| WDR44   | ZNF596  | SCML1   |  |  | SYNGR2    | HIPK2     | FXR1       | EPB41L2  |
| WDR7    | ZNF641  | SCN7A   |  |  | SYNJ2     | HIST1H2BC | FXYD5      | EPB41L4A |
| WHAMM   | ZNF644  | SCN9A   |  |  | SYNPO2    | HIST1H3E  | FZD3       | EPB41L4B |
| WHSC1L1 | ZNF652  | SCNN1G  |  |  | SYS1      | HIST3H2A  | FZD4       | EPB41L5  |
| WNT9A   | ZNF655  | SCYL2   |  |  | SYT6      | HIVEP2    | GAB1       | EPC1     |
| WWC1    | ZNF701  | SDCCAG8 |  |  | SYT8      | HIVEP3    | GABBR1     | EPC2     |
| XBP1    | ZNF704  | SDK1    |  |  | SYTL1     | HKDC1     | GABRB3     | EPDR1    |
| XKR4    | ZNF75A  | SEC14L2 |  |  | TACC1     | HLA-DOA   | GAD2       | EPHA1    |
| XPNPEP1 | ZNF800  | SEC16B  |  |  | TAF4B     | HLA-DPB1  | GADD45GIP1 | EPHA10   |
| XRN1    | ZNF83   | SEC24A  |  |  | TAF9B     | HMGB1     | GALM       | EPHA4    |
| YIPF5   | ZNF844  | SEC61A1 |  |  | TANC2     | HMGB2     | GALNT10    | EPSTI1   |
| YPEL2   | ZNF91   | SEC61B  |  |  | TANK      | HMGB3     | GALNT13    | ERAP2    |

|         |        |          |  |  |          |          |        |        |
|---------|--------|----------|--|--|----------|----------|--------|--------|
| YPEL5   | ZSWIM6 | SEC62    |  |  | TASP1    | HMGCLL1  | GALNT7 | ERBB2  |
| YTHDC1  | ZXDA   | SEC63    |  |  | TBC1D15  | HN1      | GALNT9 | ERBB3  |
| ZBTB10  |        | SEMA4A   |  |  | TBC1D23  | HNF4A    | GALP   | ERBB4  |
| ZBTB20  |        | SENP7    |  |  | TC2N     | HNF4G    | GAPVD1 | ERC1   |
| ZBTB4   |        | SEPP1    |  |  | TCEA3    | HNRNPA0  | GART   | ERCC4  |
| ZBTB41  |        | SERINC2  |  |  | TDRD9    | HNRNPC   | GAS2L3 | ERF    |
| ZBTB43  |        | SERPINA1 |  |  | TES      | HNRNPD   | GATM   | ERG    |
| ZC3H12C |        | SERPINA1 |  |  | TESC     | HNRNPM   | GBA2   | ERGIC1 |
| ZCCHC2  |        | SERPINB1 |  |  | TET2     | HNRNPR   | GBP1   | ERGIC2 |
| ZCCHC6  |        | SERPINB6 |  |  | TEX11    | HOMER1   | GBP2   | ERH    |
| ZCCHC7  |        | SERTAD1  |  |  | TGFBRAP1 | HORMAD2  | GBP3   | ERICH1 |
| ZDHHC1  |        | SETBP1   |  |  | THAP2    | HOXA13   | GBP4   | ERLIN2 |
| ZDHHC2  |        | SETD7    |  |  | THBS1    | HOXA3    | GCNT1  | ERMN   |
| ZDHHC9  |        | SETX     |  |  | THRB     | HOXA7    | GDA    | ERN1   |
| ZFAND2A |        | SFT2D2   |  |  | TIFA     | HOXB3    | GDAP1  | ERN2   |
| ZFHX3   |        | SGK2     |  |  | TIRAP    | HP1BP3   | GDE1   | ERO1LB |
| ZFP3    |        | SGMS2    |  |  | TJP2     | HPS1     | GDI2   | ERP27  |
| ZFYVE28 |        | SGSM1    |  |  | TLK1     | HPS3     | GEMIN6 | ERRF11 |
| ZHX1    |        | SH3BGRL2 |  |  | TLR3     | HRASLS5  | GF11B  | ESAM   |
| ZMAT1   |        | SH3BP4   |  |  | TM4SF1   | HRK      | GFM2   | ESCO1  |
| ZMYM6   |        | SH3RF1   |  |  | TMBIM4   | HS2ST1   | GFPT1  | ESD    |
| ZMYND15 |        | SH3RF3   |  |  | TMC4     | HS3ST3B1 | GGCX   | ESRRB  |
| ZNF10   |        | SH3TC1   |  |  | TMC5     | HS3ST4   | GGT1   | ETNK1  |
| ZNF25   |        | SHANK2   |  |  | TMCO4    | HS6ST1   | GGT6   | ETS1   |
| ZNF331  |        | SHROOM3  |  |  | TMED10   | HS6ST2   | GGT7   | ETS2   |
| ZNF350  |        | SIPA1L3  |  |  | TMEM106A | HS6ST3   | GHDC   | ETV5   |
| ZNF385B |        | SLAIN2   |  |  | TMEM107  | HSDL1    | GHRL   | ETV6   |
| ZNF395  |        | SLC10A7  |  |  | TMEM127  | HSPA12B  | GIGYF2 | ETV7   |
| ZNF430  |        | SLC12A2  |  |  | TMEM131  | HSPA1L   | GIMAP1 | EVC    |
| ZNF44   |        | SLC14A1  |  |  | TMEM139  | HSPA5    | GIMAP2 | EVL    |
| ZNF493  |        | SLC15A2  |  |  | TMEM144  | HSPA9    | GIMAP8 | EVX1   |
| ZNF506  |        | SLC15A4  |  |  | TMEM163  | HSPB6    | GIPC3  | EWSR1  |
| ZNF540  |        | SLC16A10 |  |  | TMEM171  | HSPH1    | GIPR   | EXOC2  |
| ZNF555  |        | SLC16A7  |  |  | TMEM184A | HTATIP2  | GIT2   | EXOC3  |
| ZNF595  |        | SLC1A2   |  |  | TMEM217  | HTRA3    | GJB2   | EXOC4  |
| ZNF596  |        | SLC1A4   |  |  | TMEM220  | HYI      | GK5    | EXOC5  |
| ZNF641  |        | SLC20A1  |  |  | TMEM232  | ICA1     | GLCCI1 | EXOC6  |
| ZNF652  |        | SLC22A5  |  |  | TMEM27   | ICA1L    | GLI2   | EXOC8  |
| ZNF655  |        | SLC23A1  |  |  | TMEM41A  | ICOSLG   | GLI3   | EXOSC6 |
|         |        | SLC25A25 |  |  |          |          |        |        |

|        |          |           |         |         |           |
|--------|----------|-----------|---------|---------|-----------|
| ZNF704 | SLC25A27 | TMEM52    | ID4     | GLIPR1  | EXT1      |
| ZNF710 | SLC25A30 | TMEM56    | IDH3A   | GLS     | EYA3      |
| ZNF800 | SLC25A36 | TMEM57    | IER3IP1 | GLT1D1  | F2RL2     |
| ZNF844 | SLC25A45 | TMEM62    | IFNAR1  | GLT8D2  | F5        |
| ZNF91  | SLC26A7  | TMEM86A   | IFT172  | GLTSCR2 | F7        |
| ZXDA   | SLC2A13  | TMF1      | IFT52   | GMCL1   | FAAH2     |
|        | SLC2A9   | TMPRSS13  | IFT80   | GNA12   | FADS2     |
|        | SLC30A2  | TMPRSS3   | IFT81   | GNA13   | FAF1      |
|        | SLC30A4  | TNFRSF11A | IGF1    | GNAI1   | FAHD2A    |
|        | SLC33A1  | TNFSF15   | IGF1R   | GNAO1   | FAM101B   |
|        | SLC35D2  | TNIP1     | IGFBPL1 | GNAS    | FAM102A   |
|        | SLC35E1  | TNRC6B    | IGSF11  | GNB4    | FAM102B   |
|        | SLC35F5  | TNS3      | IGSF21  | GNG11   | FAM104A   |
|        | SLC38A11 | TOM1L1    | IGSF9   | GNG12   | FAM104B   |
|        | SLC39A5  | TOR1AIP1  | IKZF2   | GNG2    | FAM105A   |
|        | SLC39A8  | TOR1AIP2  | IKZF4   | GNG7    | FAM109B   |
|        | SLC3A1   | TOX3      | IL17D   | GNGT2   | FAM110A   |
|        | SLC40A1  | TP53INP1  | IL17RB  | GNL3    | FAM110B   |
|        | SLC41A1  | TP53INP2  | IL17RC  | GNPDA2  | FAM110C   |
|        | SLC41A2  | TPD52     | IL17RD  | GNPTAB  | FAM114A1  |
|        | SLC44A3  | TPPP      | IL1RL1  | GOLGA2  | FAM118B   |
|        | SLC46A1  | TRAF1     | IL20RA  | GOLGA3  | FAM120AOS |
|        | SLC5A9   | TRAF6     | IL20RB  | GOLIM4  | FAM120C   |
|        | SLC7A2   | TRIB1     | IL6R    | GOLT1A  | FAM122A   |
|        | SLC9A7   | TRIM2     | IL6ST   | GOLT1B  | FAM126B   |
|        | SLITRK1  | TRIM25    | ILDR1   | GON4L   | FAM129B   |
|        | SLMAP    | TRIM36    | IMMP1L  | GOPC    | FAM131A   |
|        | SMAP2    | TRIM38    | IMPAD1  | GOSR2   | FAM131C   |
|        | SMARCA2  | TRIM50    | INADL   | GPAM    | FAM133A   |
|        | SMC5     | TRIM56    | ING5    | GPATCH4 | FAM135A   |
|        | SMCHD1   | TRIM7     | INHBA   | GPBP1   | FAM135B   |
|        | SNTB1    | TRIM9     | INPP5F  | GPC6    | FAM149B1  |
|        | SNX14    | TRIO      | INSM2   | GPD2    | FAM150B   |
|        | SNX25    | TRIP11    | INSR    | GPHN    | FAM19A4   |
|        | SNX9     | TRNP1     | INTS2   | GPM6A   | FAM19A5   |
|        | SOAT1    | TRPM5     | INTS4   | GPR110  | FAM20A    |
|        | SORBS1   | TRPM6     | INTS6   | GPR126  | FAM26F    |
|        | SORBS2   | TSC22D2   | INTU    | GPR155  | FAM3C     |
|        | SORCS1   | TSGA10    | IPO5    | GPR158  | FAM46C    |



|  |  |                                                                                                                                                                                                                                                                                                                                                                      |  |  |                                                                                                                                                                                                                                                                                                                                                               |                                                                                                                                                                                                                                                                                                                                                                    |                                                                                                                                                                                                                                                                                                                                                                         |                                                                                                                                                                                                                                                                                                                                                                                         |
|--|--|----------------------------------------------------------------------------------------------------------------------------------------------------------------------------------------------------------------------------------------------------------------------------------------------------------------------------------------------------------------------|--|--|---------------------------------------------------------------------------------------------------------------------------------------------------------------------------------------------------------------------------------------------------------------------------------------------------------------------------------------------------------------|--------------------------------------------------------------------------------------------------------------------------------------------------------------------------------------------------------------------------------------------------------------------------------------------------------------------------------------------------------------------|-------------------------------------------------------------------------------------------------------------------------------------------------------------------------------------------------------------------------------------------------------------------------------------------------------------------------------------------------------------------------|-----------------------------------------------------------------------------------------------------------------------------------------------------------------------------------------------------------------------------------------------------------------------------------------------------------------------------------------------------------------------------------------|
|  |  | SOS1<br>SOS2<br>SOX6<br>SP100<br>SP110<br>SP140L<br>SP2<br>SPACA3<br>SPAG9<br>SPATA13<br>SPATA5<br>SPEF2<br>SPG11<br>SPINT1<br>SPIRE1<br>SPNS2<br>SPNS3<br>SPOPL<br>SPPL2A<br>SPRR3<br>SPSB1<br>SPTBN1<br>SPTLC3<br>SQSTM1<br>SRGAP1<br>SRPRB<br>SSFA2<br>SSH2<br>SSPN<br>SSR1<br>SSTR1<br>ST3GAL1<br>ST6GALNAC<br>4<br>ST7L<br>STAM2<br>STARD10<br>STARD13<br>STIM2 |  |  | TSPAN33<br>TSTD1<br>TTC17<br>TTC21A<br>TTC22<br>TTC27<br>TTC39C<br>TTLL11<br>TTLL7<br>TTN<br>TTYH2<br>TULP4<br>TWISTNB<br>TXNDC11<br>U2AF1<br>UBE2D3<br>UBE4B<br>UBIAD1<br>UBN2<br>UBR3<br>UBXN2B<br>UCA1<br>UFM1<br>UGCG<br>UGT8<br>UHMK1<br>ULBP2<br>ULK4<br>UNC13D<br>USP16<br>USP2<br>USP24<br>USP3<br>USP30<br>USP31<br>USP34<br>USP36<br>USP38<br>USP43 | IPPK<br>IQGAP2<br>IQSEC2<br>IRAK1BP1<br>IRAK2<br>IREB2<br>IRF1<br>IRF2BP2<br>IRX2<br>IRX3<br>ISY1<br>ISYNA1<br>ITCH<br>ITFG3<br>ITGA1<br>ITGA2<br>ITGB2<br>ITGB8<br>ITGBL1<br>ITPR1<br>ITSN1<br>JAKMIP1<br>JAM2<br>JAM3<br>JARID2<br>JAZF1<br>JDP2<br>JMJD1C<br>JMJD4<br>JPH3<br>JUND<br>KALRN<br>KANK1<br>KANK4<br>KATNAL1<br>KATNAL2<br>KBTBD3<br>KCMF1<br>KCNA1 | GPR160<br>GPR176<br>GPR180<br>GPR26<br>GPR55<br>GPR68<br>GPR98<br>GPRC5B<br>GPRIN1<br>GPRIN3<br>GPSM1<br>GPSM2<br>GPT2<br>GPX2<br>GRAMD3<br>GRASP<br>GRB2<br>GRIA2<br>GRIA3<br>GRIA4<br>GRID1<br>GRIK3<br>GRIN2A<br>GRIN3A<br>GRIPAP1<br>GRPEL2<br>GSK3B<br>GSN<br>GSTA4<br>GSTCD<br>GSTM3<br>GSTO2<br>GSTT1<br>GTDC1<br>GTF2A1<br>GTF2H3<br>GTF2H5<br>GTF3C6<br>GTPBP1 | FAM58A<br>FAM60A<br>FAM63A<br>FAM65A<br>FAM71E1<br>FAM71F1<br>FAM73A<br>FAM73B<br>FAM76A<br>FAM76B<br>FAM81A<br>FAM81B<br>FAM83B<br>FAM83F<br>FAM84A<br>FAM84B<br>FAM91A1<br>FAM92A1<br>FAM98A<br>FAM98C<br>FANCA<br>FANCD2<br>FANCF<br>FARP1<br>FARP2<br>FARSB<br>FASTKD2<br>FAT3<br>FAU<br>FBLIM1<br>FBN1<br>FBRS<br>FBXL16<br>FBXL17<br>FBXL19<br>FBXL20<br>FBXL3<br>FBXL4<br>FBXO10 |
|--|--|----------------------------------------------------------------------------------------------------------------------------------------------------------------------------------------------------------------------------------------------------------------------------------------------------------------------------------------------------------------------|--|--|---------------------------------------------------------------------------------------------------------------------------------------------------------------------------------------------------------------------------------------------------------------------------------------------------------------------------------------------------------------|--------------------------------------------------------------------------------------------------------------------------------------------------------------------------------------------------------------------------------------------------------------------------------------------------------------------------------------------------------------------|-------------------------------------------------------------------------------------------------------------------------------------------------------------------------------------------------------------------------------------------------------------------------------------------------------------------------------------------------------------------------|-----------------------------------------------------------------------------------------------------------------------------------------------------------------------------------------------------------------------------------------------------------------------------------------------------------------------------------------------------------------------------------------|

|  |  |                                                                                                                                                                                                                                                                                                                                                                 |  |  |                                                                                                                                                                                                                                                                                                                                                              |                                                                                                                                                                                                                                                                                                                                                                                                            |                                                                                                                                                                                                                                                                                                                                                                     |                                                                                                                                                                                                                                                                                                                                                                   |
|--|--|-----------------------------------------------------------------------------------------------------------------------------------------------------------------------------------------------------------------------------------------------------------------------------------------------------------------------------------------------------------------|--|--|--------------------------------------------------------------------------------------------------------------------------------------------------------------------------------------------------------------------------------------------------------------------------------------------------------------------------------------------------------------|------------------------------------------------------------------------------------------------------------------------------------------------------------------------------------------------------------------------------------------------------------------------------------------------------------------------------------------------------------------------------------------------------------|---------------------------------------------------------------------------------------------------------------------------------------------------------------------------------------------------------------------------------------------------------------------------------------------------------------------------------------------------------------------|-------------------------------------------------------------------------------------------------------------------------------------------------------------------------------------------------------------------------------------------------------------------------------------------------------------------------------------------------------------------|
|  |  | STK17B<br>STK31<br>STK32A<br>STX3<br>STX4<br>STXBP5<br>STXBP6<br>SUSD1<br>SUSD2<br>SUSD4<br>SV2B<br>SVEP1<br>SYCP2<br>SYK<br>SYNE1<br>SYNE2<br>SYNGR2<br>SYNJ1<br>SYNJ2<br>SYNPO<br>SYS1<br>SYTL1<br>SYTL4<br>TACC1<br>TACSTD2<br>TADA2B<br>TAF1<br>TAF9B<br>TANC1<br>TANC2<br>TANK<br>TAPT1<br>TASP1<br>TBC1D15<br>TBC1D23<br>TBC1D8B<br>TC2N<br>TCEA3<br>TEP1 |  |  | USP47<br>USP9X<br>UTRN<br>VAV3<br>VCIPI1<br>VEPH1<br>VGLL3<br>VIL1<br>VPS13A<br>VPS13B<br>VPS13C<br>WAC<br>WDFY2<br>WDFY3<br>WDR44<br>WDR66<br>WDR7<br>WDR72<br>WFDC3<br>WHAMM<br>WNK2<br>WNT4<br>WNT9A<br>WWC1<br>XAF1<br>XBP1<br>XDH<br>XRN1<br>YTHDC1<br>ZBED3<br>ZBTB10<br>ZBTB20<br>ZBTB43<br>ZBTB44<br>ZC3H12C<br>ZCCHC2<br>ZCCHC6<br>ZCCHC7<br>ZDHC14 | KCNAB1<br>KCNB1<br>KCNC1<br>KCNC2<br>KCNC3<br>KCNH7<br>KCNJ15<br>KCNJ16<br>KCNJ3<br>KCNJ6<br>KCNK10<br>KCNK17<br>KCNK3<br>KCNK4<br>KCNK6<br>KCNMA1<br>KCNMB2<br>KCNMB4<br>KCNQ5<br>KCNRG<br>KCTD1<br>KCTD10<br>KCTD11<br>KCTD16<br>KCTD6<br>KDSR<br>KHDRBS1<br>KHSRP<br>KIAA0232<br>KIAA0319L<br>KIAA0368<br>KIAA0907<br>KIAA1211<br>KIAA1217<br>KIAA1244<br>KIAA1257<br>KIAA1324<br>KIAA1324L<br>KIAA1377 | GTPBP2<br>GTSE1<br>GUCA1B<br>GUCA1C<br>GUCY1A2<br>GUCY1A3<br>GUK1<br>GULP1<br>GZF1<br>H2AFV<br>H6PD<br>HACE1<br>HAP1<br>HAPLN4<br>HAS3<br>HAVCR2<br>HAX1<br>HBEGF<br>HBP1<br>HCFC1<br>HCFC2<br>HCN3<br>HDAC4<br>HDAC5<br>HDAC7<br>HDAC8<br>HDAC9<br>HDDC3<br>HDHD2<br>HDLBP<br>HEATR5A<br>HEATR5B<br>HECTD1<br>HECTD2<br>HECW2<br>HERC1<br>HERC4<br>HERPUD2<br>HEXA | FBXO15<br>FBXO16<br>FBXO18<br>FBXO2<br>FBXO22<br>FBXO3<br>FBXO30<br>FBXO31<br>FBXO33<br>FBXO36<br>FBXO38<br>FBXO5<br>FBXO6<br>FBXO7<br>FBXO8<br>FBXO9<br>FBXW7<br>FBXW8<br>FCAMR<br>FCHSD1<br>FCRLB<br>FDX1L<br>FECH<br>FEM1A<br>FER<br>FERMT1<br>FGA<br>FGD3<br>FGD5<br>FGD6<br>FGF10<br>FGF12<br>FGF14<br>FGF18<br>FGF19<br>FGF9<br>FGFBP3<br>FGFR1<br>FGFR1OP2 |
|--|--|-----------------------------------------------------------------------------------------------------------------------------------------------------------------------------------------------------------------------------------------------------------------------------------------------------------------------------------------------------------------|--|--|--------------------------------------------------------------------------------------------------------------------------------------------------------------------------------------------------------------------------------------------------------------------------------------------------------------------------------------------------------------|------------------------------------------------------------------------------------------------------------------------------------------------------------------------------------------------------------------------------------------------------------------------------------------------------------------------------------------------------------------------------------------------------------|---------------------------------------------------------------------------------------------------------------------------------------------------------------------------------------------------------------------------------------------------------------------------------------------------------------------------------------------------------------------|-------------------------------------------------------------------------------------------------------------------------------------------------------------------------------------------------------------------------------------------------------------------------------------------------------------------------------------------------------------------|

|  |  |          |  |  |         |           |           |         |
|--|--|----------|--|--|---------|-----------|-----------|---------|
|  |  | TES      |  |  | ZDHHC9  | KIAA1407  | HEXIM2    | FGFR2   |
|  |  | TESC     |  |  | ZFAND2A | KIAA1429  | HEY2      | FGGY    |
|  |  | TET2     |  |  | ZFHX3   | KIAA1462  | HEYL      | FHDC1   |
|  |  | TFCP2L1  |  |  | ZFP28   | KIAA1468  | HFE       | FIGN    |
|  |  | TGFB2    |  |  | ZFP3    | KIAA1549  | HGD       | FILIP1  |
|  |  | TGFBR3   |  |  | ZFX     | KIAA1586  | HGSNAT    | FKBP11  |
|  |  | THAP2    |  |  | ZFYVE28 | KIAA1683  | HHIP      | FKBP15  |
|  |  | THBS1    |  |  | ZMAT1   | KIAA1715  | HIAT1     | FKBP5   |
|  |  | THRB     |  |  | ZMYM5   | KIAA1919  | HIATL1    | FKBP7   |
|  |  | THSD4    |  |  | ZMYM6   | KIAA1958  | HIC1      | FKRP    |
|  |  | THSD7A   |  |  | ZNF10   | KIAA2013  | HIF3A     | FLCN    |
|  |  | TIFA     |  |  | ZNF100  | KIAA2018  | HIGD1A    | FLI1    |
|  |  | TIRAP    |  |  | ZNF148  | KIAA2022  | HIP1      | FLRT3   |
|  |  | TLR3     |  |  | ZNF207  | KIDINS220 | HIPK2     | FLT1    |
|  |  | TM4SF1   |  |  | ZNF25   | KIF19     | HIPK3     | FLVCR1  |
|  |  | TM4SF18  |  |  | ZNF350  | KIF1A     | HIST1H2BC | FLYWCH2 |
|  |  | TMBIM4   |  |  | ZNF385B | KIF1B     | HIST1H3E  | FMN1    |
|  |  | TMC4     |  |  | ZNF394  | KIF21A    | HIST1H4H  | FMN2    |
|  |  | TMC5     |  |  | ZNF395  | KIF26B    | HKDC1     | FMNL3   |
|  |  | TMCC3    |  |  | ZNF398  | KIF3A     | HLA-DPB1  | FNBP1   |
|  |  | TMCO4    |  |  | ZNF407  | KIF3B     | HLA-DPB2  | FNDC3A  |
|  |  | TMED10   |  |  | ZNF430  | KIF5A     | HM13      | FNDC7   |
|  |  | TMED2    |  |  | ZNF431  | KIF9      | HMGB1     | FNIP1   |
|  |  | TMED5    |  |  | ZNF439  | KIFC2     | HMGCLL1   | FNIP2   |
|  |  | TMED6    |  |  | ZNF44   | KIN       | HMGCS2    | FNTA    |
|  |  | TMEM106A |  |  | ZNF471  | KIRREL3   | HMX2      | FOLR2   |
|  |  | TMEM107  |  |  | ZNF483  | KLC1      | HN1       | FOXA1   |
|  |  | TMEM117  |  |  | ZNF493  | KLC3      | HNF4A     | FOXA3   |
|  |  | TMEM127  |  |  | ZNF506  | KLF12     | HNF4G     | FO XK1  |
|  |  | TMEM131  |  |  | ZNF562  | KLF13     | HNMT      | FO XK2  |
|  |  | TMEM136  |  |  | ZNF585B | KLF15     | HNRNPD    | FO XN3  |
|  |  | TMEM144  |  |  | ZNF595  | KLF3      | HNRNPK    | FOXO1   |
|  |  | TMEM156  |  |  | ZNF600  | KLF6      | HOMER1    | FOXP1   |
|  |  | TMEM163  |  |  | ZNF652  | KLF8      | HOOK1     | FOXP2   |
|  |  | TMEM171  |  |  | ZNF655  | KLF9      | HOOK3     | FOXP3   |
|  |  | TMEM181  |  |  | ZNF681  | KLHDC8A   | HOXA13    | FOXP4   |
|  |  | TMEM184A |  |  | ZNF701  | KLHDC9    | HOXA3     | FOXQ1   |
|  |  | TMEM217  |  |  | ZNF704  | KLHL1     | HOXA7     | FOXR1   |
|  |  | TMEM25   |  |  | ZNF708  | KLHL12    | HOXB13    | FOXRED2 |

|  |  |                                                                                                                                                                                                                                                                                                                                                                                                             |  |  |                                                                                                                            |                                                                                                                                                                                                                                                                                                                                                                          |                                                                                                                                                                                                                                                                                                                                                                            |                                                                                                                                                                                                                                                                                                                                                                |
|--|--|-------------------------------------------------------------------------------------------------------------------------------------------------------------------------------------------------------------------------------------------------------------------------------------------------------------------------------------------------------------------------------------------------------------|--|--|----------------------------------------------------------------------------------------------------------------------------|--------------------------------------------------------------------------------------------------------------------------------------------------------------------------------------------------------------------------------------------------------------------------------------------------------------------------------------------------------------------------|----------------------------------------------------------------------------------------------------------------------------------------------------------------------------------------------------------------------------------------------------------------------------------------------------------------------------------------------------------------------------|----------------------------------------------------------------------------------------------------------------------------------------------------------------------------------------------------------------------------------------------------------------------------------------------------------------------------------------------------------------|
|  |  | TMEM27<br>TMEM30B<br>TMEM39A<br>TMEM41A<br>TMEM45B<br>TMEM50B<br>TMEM52<br>TMEM56<br>TMEM57<br>TMEM59<br>TMEM62<br>TMEM86A<br>TMEM88<br>TMEM9B<br>TMF1<br>TMPRSS13<br>TMPRSS2<br>TMTC2<br>TNFRSF11A<br>TNFSF14<br>TNFSF15<br>TNIP1<br>TNS3<br>TOM1L1<br>TOM1L2<br>TOR1AIP1<br>TOR1AIP2<br>TP53INP1<br>TPM1<br>TRAF1<br>TRAF3IP3<br>TRAF6<br>TRIB1<br>TRIM25<br>TRIM38<br>TRIM4<br>TRIM47<br>TRIM56<br>TRIM9 |  |  | ZNF710<br>ZNF717<br>ZNF721<br>ZNF75A<br>ZNF789<br>ZNF800<br>ZNF827<br>ZNF844<br>ZNF91<br>ZNFX1<br>ZSWIM1<br>ZSWIM6<br>ZXDA | KLHL13<br>KLHL15<br>KLHL24<br>KLHL28<br>KLHL29<br>KLHL5<br>KLHL6<br>KLHL7<br>KLHL9<br>KLK12<br>KLRG2<br>KNDC1<br>KPNA4<br>KRBA1<br>KRIT1<br>KRT19<br>KRT80<br>KRTAP3-2<br>KRTAP4-1<br>KSR1<br>KSR2<br>L3MBTL2<br>L3MBTL3<br>L3MBTL4<br>LAMA1<br>LAMP2<br>LARP6<br>LAYN<br>LCA5<br>LCA5L<br>LCORL<br>LCP2<br>LDB2<br>LDLRAD3<br>LDOC1L<br>LELP1<br>LENG1<br>LENG8<br>LFNG | HOXB3<br>HP1BP3<br>HPS1<br>HRK<br>HS2ST1<br>HS3ST3B1<br>HS3ST4<br>HS6ST1<br>HS6ST2<br>HS6ST3<br>HSD17B14<br>HSD3B1<br>HSDL1<br>HSF5<br>HSPA12B<br>HSPA1L<br>HSPA5<br>HSPB6<br>HSPB8<br>HSPD1<br>HSPH1<br>HTATIP2<br>HTRA3<br>HYI<br>ICA1<br>ICA1L<br>ID4<br>IDH1<br>IER3IP1<br>IFIT2<br>IFIT3<br>IFNGR1<br>IFRD1<br>IFT80<br>IGF1<br>IGF1R<br>IGF2BP2<br>IGFBPL1<br>IGSF10 | FPR3<br>FRAS1<br>FRMD4A<br>FRMD6<br>FRMPD4<br>FRS2<br>FRZB<br>FST<br>FSTL1<br>FSTL5<br>FUBP3<br>FUCA1<br>FUK<br>FUNDC1<br>FUT10<br>FXR1<br>FXYD5<br>FZD1<br>FZD3<br>FZD4<br>GAB1<br>GAB3<br>GABBR1<br>GABPA<br>GABPB2<br>GABRB3<br>GAD2<br>GADD45GIP1<br>GALM<br>GALNT10<br>GALNT12<br>GALNT13<br>GALNT7<br>GALNT9<br>GALP<br>GALT<br>GAPVD1<br>GART<br>GAS2L3 |
|--|--|-------------------------------------------------------------------------------------------------------------------------------------------------------------------------------------------------------------------------------------------------------------------------------------------------------------------------------------------------------------------------------------------------------------|--|--|----------------------------------------------------------------------------------------------------------------------------|--------------------------------------------------------------------------------------------------------------------------------------------------------------------------------------------------------------------------------------------------------------------------------------------------------------------------------------------------------------------------|----------------------------------------------------------------------------------------------------------------------------------------------------------------------------------------------------------------------------------------------------------------------------------------------------------------------------------------------------------------------------|----------------------------------------------------------------------------------------------------------------------------------------------------------------------------------------------------------------------------------------------------------------------------------------------------------------------------------------------------------------|

|  |  |                                                                                                                                                                                                                                                                                                                                                            |  |  |  |                                                                                                                                                                                                                                                                                                                                                            |                                                                                                                                                                                                                                                                                                                                                            |                                                                                                                                                                                                                                                                                                                                          |
|--|--|------------------------------------------------------------------------------------------------------------------------------------------------------------------------------------------------------------------------------------------------------------------------------------------------------------------------------------------------------------|--|--|--|------------------------------------------------------------------------------------------------------------------------------------------------------------------------------------------------------------------------------------------------------------------------------------------------------------------------------------------------------------|------------------------------------------------------------------------------------------------------------------------------------------------------------------------------------------------------------------------------------------------------------------------------------------------------------------------------------------------------------|------------------------------------------------------------------------------------------------------------------------------------------------------------------------------------------------------------------------------------------------------------------------------------------------------------------------------------------|
|  |  | TRIO<br>TRIP11<br>TRIP12<br>TRPM6<br>TSC22D2<br>TSHZ1<br>TSHZ2<br>TTC17<br>TTC21A<br>TTC32<br>TTC39C<br>TTC7B<br>TTLL11<br>TTLL7<br>TTN<br>TTYH2<br>TULP4<br>TWF1<br>TXNDC11<br>UBE2D3<br>UBE2H<br>UBE2J1<br>UBE2U<br>UBR3<br>UCA1<br>UFM1<br>UGCG<br>UGT8<br>UHMK1<br>ULK4<br>USP16<br>USP2<br>USP24<br>USP3<br>USP30<br>USP31<br>USP34<br>USP36<br>USP38 |  |  |  | LHFP<br>LHFPL4<br>LIFR<br>LIG4<br>LIMCH1<br>LIN52<br>LIN54<br>LIN7B<br>LINGO1<br>LINGO2<br>LIPH<br>LIX1L<br>LMBR1<br>LMBRD1<br>LMBRD2<br>LMCD1<br>LMLN<br>LMO2<br>LMO3<br>LMO4<br>LMO7<br>LMOD2<br>LNPEP<br>LNX1<br>LONRF1<br>LONRF2<br>LOXL4<br>LPAR3<br>LPAR5<br>LPGAT1<br>LPP<br>LRCH3<br>LRFN2<br>LRFN5<br>LRG1<br>LRP10<br>LRP11<br>LRPAP1<br>LRRC16A | IGSF21<br>IGSF9<br>IK<br>IKZF2<br>IKZF4<br>IKZF5<br>IL17D<br>IL17RA<br>IL17RB<br>IL17RD<br>IL17RE<br>IL18BP<br>IL1RL1<br>IL20RA<br>IL6R<br>IL6ST<br>IMMP1L<br>IMPAD1<br>INADL<br>ING3<br>ING5<br>INHBA<br>INPP5F<br>INSM2<br>INTS10<br>INTS2<br>INTS6<br>INTS9<br>IPO5<br>IPO9<br>IPPK<br>IQCH<br>IQGAP2<br>IRF1<br>IRX2<br>IRX3<br>ITCH<br>ITGA1<br>ITGA2 | GATA4<br>GATC<br>GATM<br>GBA2<br>GBP1<br>GBP2<br>GBP3<br>GBP4<br>GCC2<br>GCLM<br>GCNT1<br>GDA<br>GDAP1<br>GDE1<br>GDI2<br>GDNF<br>GEMIN5<br>GEMIN6<br>GFI1B<br>GFM2<br>GFPT1<br>GGCX<br>GGNBP2<br>GGT1<br>GGT6<br>GGT7<br>GHDC<br>GHRL<br>GIGYF2<br>GIMAP1<br>GIMAP2<br>GIMAP8<br>GIPC2<br>GIPC3<br>GIPR<br>GIT2<br>GJB2<br>GJC1<br>GJD3 |
|--|--|------------------------------------------------------------------------------------------------------------------------------------------------------------------------------------------------------------------------------------------------------------------------------------------------------------------------------------------------------------|--|--|--|------------------------------------------------------------------------------------------------------------------------------------------------------------------------------------------------------------------------------------------------------------------------------------------------------------------------------------------------------------|------------------------------------------------------------------------------------------------------------------------------------------------------------------------------------------------------------------------------------------------------------------------------------------------------------------------------------------------------------|------------------------------------------------------------------------------------------------------------------------------------------------------------------------------------------------------------------------------------------------------------------------------------------------------------------------------------------|

|  |  |                                                                                                                                                                                                                                                                                                                                                     |  |  |  |                                                                                                                                                                                                                                                                                                                                                                           |                                                                                                                                                                                                                                                                                                                                                                 |                                                                                                                                                                                                                                                                                                                                                       |
|--|--|-----------------------------------------------------------------------------------------------------------------------------------------------------------------------------------------------------------------------------------------------------------------------------------------------------------------------------------------------------|--|--|--|---------------------------------------------------------------------------------------------------------------------------------------------------------------------------------------------------------------------------------------------------------------------------------------------------------------------------------------------------------------------------|-----------------------------------------------------------------------------------------------------------------------------------------------------------------------------------------------------------------------------------------------------------------------------------------------------------------------------------------------------------------|-------------------------------------------------------------------------------------------------------------------------------------------------------------------------------------------------------------------------------------------------------------------------------------------------------------------------------------------------------|
|  |  | USP43<br>USP47<br>USP53<br>UTRN<br>VAPA<br>VAV3<br>VEPH1<br>VGLL3<br>VIL1<br>VPS13C<br>VPS36<br>VPS37A<br>VPS41<br>VPS53<br>WAC<br>WDFY2<br>WDFY3<br>WDR13<br>WDR19<br>WDR26<br>WDR31<br>WDR44<br>WDR7<br>WDR72<br>WHAMM<br>WHSC1L1<br>WNK2<br>WNT9A<br>WWC1<br>XBP1<br>XDH<br>XKR4<br>XPNPEP1<br>XRN1<br>XRR1<br>YIPF5<br>YPEL2<br>YPEL5<br>YTHDC1 |  |  |  | LRRC28<br>LRRC34<br>LRRC37A2<br>LRRC56<br>LRRC6<br>LRRC8A<br>LRRC8E<br>LRRCC1<br>LRRFIP1<br>LRRFIP2<br>LRRIQ1<br>LRRK2<br>LRRTM1<br>LSAMP<br>LSM10<br>LTB4R<br>LTBP2<br>LUC7L<br>LUM<br>LY6K<br>LYAR<br>LYPD5<br>LYRM4<br>LYRM7<br>LYSMD1<br>LYSMD2<br>LYSMD3<br>LYSMD4<br>LZIC<br>LZTS2<br>MACF1<br>MACROD2<br>MAFB<br>MAFG<br>MAGI2<br>MAGI3<br>MAGT1<br>MAL2<br>MAMDC2 | ITGB2<br>ITGB4<br>ITGB8<br>ITGBL1<br>ITLN1<br>ITPR1<br>JAG1<br>JAGN1<br>JAKMIP1<br>JAKMIP3<br>JAM2<br>JAM3<br>JARID2<br>JAZF1<br>JDP2<br>JMJD1C<br>JMY<br>JPH1<br>JPH3<br>JUND<br>KAAG1<br>KAL1<br>KALRN<br>KANK1<br>KANK4<br>KATNAL1<br>KATNAL2<br>KBTBD3<br>KBTBD6<br>KBTBD7<br>KCMF1<br>KCNA1<br>KCNB1<br>KCNC2<br>KCNC4<br>KCNH3<br>KCNP2<br>KCNJ3<br>KCNJ6 | GK5<br>GKAP1<br>GLCC1<br>GLI2<br>GLI3<br>GLIPR1<br>GLIS3<br>GLS<br>GLT1D1<br>GLT8D2<br>GLTSCR2<br>GLUL<br>GM2A<br>GMCL1<br>GMDS<br>GMIP<br>GNA12<br>GNA13<br>GNAI1<br>GNAO1<br>GNAS<br>GNB4<br>GNG11<br>GNG12<br>GNG2<br>GNG7<br>GNG8<br>GNGT2<br>GNL1<br>GNL3<br>GNPDA2<br>GNPTAB<br>GOLGA2<br>GOLGA3<br>GOLIM4<br>GOLT1A<br>GOLT1B<br>GON4L<br>GOPC |
|--|--|-----------------------------------------------------------------------------------------------------------------------------------------------------------------------------------------------------------------------------------------------------------------------------------------------------------------------------------------------------|--|--|--|---------------------------------------------------------------------------------------------------------------------------------------------------------------------------------------------------------------------------------------------------------------------------------------------------------------------------------------------------------------------------|-----------------------------------------------------------------------------------------------------------------------------------------------------------------------------------------------------------------------------------------------------------------------------------------------------------------------------------------------------------------|-------------------------------------------------------------------------------------------------------------------------------------------------------------------------------------------------------------------------------------------------------------------------------------------------------------------------------------------------------|

|         |           |           |         |
|---------|-----------|-----------|---------|
| ZBTB10  | MAMDC4    | KCNK10    | GOSR2   |
| ZBTB20  | MAML2     | KCNK17    | GPAM    |
| ZBTB38  | MAN2C1    | KCNK3     | GPATCH4 |
| ZBTB4   | MANBAL    | KCNK6     | GPBP1   |
| ZBTB41  | MANEA     | KCNMA1    | GPC6    |
| ZBTB43  | MANEAL    | KCNMB2    | GPD2    |
| ZC3H12C | MAP1B     | KCNMB4    | GPHN    |
| ZCCHC2  | MAP1LC3A  | KCNQ4     | GPM6A   |
| ZCCHC6  | MAP2      | KCNQ5     | GPR110  |
| ZCCHC7  | MAP2K7    | KCNRG     | GPR126  |
| ZDHHC1  | MAP3K1    | KCTD11    | GPR155  |
| ZDHHC2  | MAP3K13   | KCTD16    | GPR158  |
| ZDHHC9  | MAP3K15   | KCTD18    | GPR160  |
| ZFAND2A | MAP3K2    | KCTD20    | GPR176  |
| ZFHX3   | MAP3K3    | KCTD6     | GPR180  |
| ZFP28   | MAP3K8    | KHSRP     | GPR26   |
| ZFP3    | MAP4      | KIAA0232  | GPR39   |
| ZFX     | MAP4K4    | KIAA0319L | GPR55   |
| ZFYVE16 | MAP6      | KIAA0907  | GPR68   |
| ZFYVE28 | MAP7D2    | KIAA1147  | GPR98   |
| ZHX1    | MAP9      | KIAA1161  | GPRC5A  |
| ZMAT1   | MAPK1     | KIAA1211  | GPRC5B  |
| ZMYM5   | MAPK15    | KIAA1217  | GPRIN1  |
| ZMYM6   | MAPK11P1L | KIAA1244  | GPRIN3  |
| ZMYND15 | MAPK4     | KIAA1257  | GPSM1   |
| ZNF10   | MAPK6     | KIAA1324  | GPSM2   |
| ZNF124  | MAPRE3    | KIAA1377  | GPT2    |
| ZNF148  | MAPT      | KIAA1429  | GPX2    |
| ZNF175  | MARK1     | KIAA1462  | GRAMD1A |
| ZNF19   | MARK3     | KIAA1522  | GRAMD3  |
| ZNF25   | MARS2     | KIAA1524  | GRASP   |
| ZNF264  | MARVELD3  | KIAA1683  | GRB2    |
| ZNF331  | MAST4     | KIAA1715  | GRIA2   |
| ZNF350  | MASTL     | KIAA1841  | GRIA3   |
| ZNF385B | MAT2B     | KIAA1919  | GRIA4   |
| ZNF394  | MATR3     | KIAA1958  | GRID1   |
| ZNF395  | MBD1      | KIAA2013  | GRIK3   |
| ZNF407  | MBD6      | KIAA2018  | GRIN2A  |
| ZNF430  | MBNL1     | KIAA2022  | GRIN2B  |

|  |                                                                                                                                                                                                                                          |  |  |  |                                                                                                                                                                                                                                                                                                                                                       |                                                                                                                                                                                                                                                                                                                                                                      |                                                                                                                                                                                                                                                                                                                                                                             |
|--|------------------------------------------------------------------------------------------------------------------------------------------------------------------------------------------------------------------------------------------|--|--|--|-------------------------------------------------------------------------------------------------------------------------------------------------------------------------------------------------------------------------------------------------------------------------------------------------------------------------------------------------------|----------------------------------------------------------------------------------------------------------------------------------------------------------------------------------------------------------------------------------------------------------------------------------------------------------------------------------------------------------------------|-----------------------------------------------------------------------------------------------------------------------------------------------------------------------------------------------------------------------------------------------------------------------------------------------------------------------------------------------------------------------------|
|  | ZNF436<br>ZNF44<br>ZNF471<br>ZNF493<br>ZNF506<br>ZNF540<br>ZNF555<br>ZNF585B<br>ZNF595<br>ZNF596<br>ZNF641<br>ZNF644<br>ZNF652<br>ZNF655<br>ZNF701<br>ZNF704<br>ZNF710<br>ZNF75A<br>ZNF800<br>ZNF83<br>ZNF844<br>ZNF91<br>ZSWIM6<br>ZXDA |  |  |  | MBOAT1<br>MBOAT2<br>MBP<br>MCC<br>MCF2L<br>MCM10<br>MCTP1<br>MDGA1<br>MDH1B<br>MDM2<br>ME3<br>MED10<br>MED19<br>MED28<br>MED31<br>MED4<br>MEF2A<br>MEF2D<br>MEG3<br>MEIS3<br>METAP2<br>METTL7A<br>METTL9<br>MEX3B<br>MEX3C<br>MFHAS1<br>MGA<br>MGAT3<br>MGAT5B<br>MGEA5<br>MGP<br>MGST1<br>MIB1<br>MICAL2<br>MICALL2<br>MIDN<br>MIER1<br>MINA<br>MITF | KIDINS220<br>KIF16B<br>KIF19<br>KIF1A<br>KIF1B<br>KIF21A<br>KIF3A<br>KIF3B<br>KIF5A<br>KIFC2<br>KIN<br>KIRREL2<br>KIRREL3<br>KLB<br>KLC1<br>KLC4<br>KLF12<br>KLF13<br>KLF15<br>KLF3<br>KLF6<br>KLF8<br>KLHDC8A<br>KLHDC9<br>KLHL1<br>KLHL12<br>KLHL15<br>KLHL23<br>KLHL24<br>KLHL29<br>KLHL5<br>KLHL7<br>KLHL8<br>KLHL9<br>KLRG2<br>KNDC1<br>KPNA4<br>KRCC1<br>KRIT1 | GRIN3A<br>GRIPAP1<br>GRPEL2<br>GSK3B<br>GSN<br>GSTA4<br>GSTCD<br>GSTM3<br>GSTO2<br>GSTT1<br>GTDC1<br>GTF2A1<br>GTF2H3<br>GTF2H5<br>GTF2IRD2<br>GTF3C4<br>GTF3C5<br>GTF3C6<br>GTPBP1<br>GTPBP2<br>GTPBP8<br>GTSE1<br>GUCA1B<br>GUCA1C<br>GUCY1A2<br>GUCY1A3<br>GUF1<br>GUK1<br>GULP1<br>GZF1<br>H2AFJ<br>H2AFV<br>H6PD<br>HACE1<br>HAP1<br>HAPLN4<br>HARB1<br>HAS3<br>HAVCR2 |
|--|------------------------------------------------------------------------------------------------------------------------------------------------------------------------------------------------------------------------------------------|--|--|--|-------------------------------------------------------------------------------------------------------------------------------------------------------------------------------------------------------------------------------------------------------------------------------------------------------------------------------------------------------|----------------------------------------------------------------------------------------------------------------------------------------------------------------------------------------------------------------------------------------------------------------------------------------------------------------------------------------------------------------------|-----------------------------------------------------------------------------------------------------------------------------------------------------------------------------------------------------------------------------------------------------------------------------------------------------------------------------------------------------------------------------|



|  |  |  |  |  |  |                                                                                                                                                                                                                                                                                                                                                              |                                                                                                                                                                                                                                                                                                                                                                        |                                                                                                                                                                                                                                                                                                                                                          |
|--|--|--|--|--|--|--------------------------------------------------------------------------------------------------------------------------------------------------------------------------------------------------------------------------------------------------------------------------------------------------------------------------------------------------------------|------------------------------------------------------------------------------------------------------------------------------------------------------------------------------------------------------------------------------------------------------------------------------------------------------------------------------------------------------------------------|----------------------------------------------------------------------------------------------------------------------------------------------------------------------------------------------------------------------------------------------------------------------------------------------------------------------------------------------------------|
|  |  |  |  |  |  | MKKS<br>MKNK2<br>MKX<br>MLKL<br>MLLT1<br>MLLT4<br>MLLT6<br>MMAA<br>MMD<br>MMD2<br>MNT<br>MOGAT3<br>MON1B<br>MON2<br>MORC2<br>MORF4L1<br>MORF4L2<br>MORN3<br>MOXD1<br>MPHOSPH8<br>MPP5<br>MPP7<br>MPZL1<br>MPZL2<br>MPZL3<br>MR1<br>MRAS<br>MRE11A<br>MREG<br>MRPL2<br>MRPL27<br>MRPL30<br>MRPL32<br>MRPL37<br>MRPL43<br>MRPL44<br>MRPL54<br>MRPS23<br>MRPS26 | KRT19<br>KRT73<br>KRT80<br>KRTAP3-2<br>KRTAP4-1<br>KRTCAP2<br>KSR2<br>L3MBTL3<br>L3MBTL4<br>LACTB2<br>LAMA1<br>LAMA3<br>LAMB4<br>LANCL2<br>LARP1<br>LARP4<br>LARP6<br>LATS1<br>LATS2<br>LCA5L<br>LCN12<br>LCOR<br>LCORL<br>LCP2<br>LDOC1L<br>LELP1<br>LENG8<br>LEPROT<br>LFNG<br>LGR6<br>LHFP<br>LHFPL4<br>LIFR<br>LIMCH1<br>LIN37<br>LIN52<br>LIN7B<br>LIN9<br>LINGO1 | HAX1<br>HBEGF<br>HBP1<br>HBS1L<br>HCFC1<br>HCFC2<br>HCN3<br>HDAC4<br>HDAC5<br>HDAC7<br>HDAC8<br>HDAC9<br>HDDC3<br>HDHD2<br>HDLBP<br>HEATR5A<br>HEATR5B<br>HECA<br>HECTD1<br>HECTD2<br>HECW2<br>HERC1<br>HERC4<br>HERPUD2<br>HEXA<br>HEXIM2<br>HEY2<br>HEYL<br>HFE<br>HGD<br>HGS<br>HGSNAT<br>HHIP<br>HHLA2<br>HIAT1<br>HIATL1<br>HIC1<br>HIF3A<br>HIGD1A |
|--|--|--|--|--|--|--------------------------------------------------------------------------------------------------------------------------------------------------------------------------------------------------------------------------------------------------------------------------------------------------------------------------------------------------------------|------------------------------------------------------------------------------------------------------------------------------------------------------------------------------------------------------------------------------------------------------------------------------------------------------------------------------------------------------------------------|----------------------------------------------------------------------------------------------------------------------------------------------------------------------------------------------------------------------------------------------------------------------------------------------------------------------------------------------------------|

|  |  |  |  |  |  |                                                                                                                                                                                                                                                                                                                                             |                                                                                                                                                                                                                                                                                                                                                            |                                                                                                                                                                                                                                                                                                                                                                                             |
|--|--|--|--|--|--|---------------------------------------------------------------------------------------------------------------------------------------------------------------------------------------------------------------------------------------------------------------------------------------------------------------------------------------------|------------------------------------------------------------------------------------------------------------------------------------------------------------------------------------------------------------------------------------------------------------------------------------------------------------------------------------------------------------|---------------------------------------------------------------------------------------------------------------------------------------------------------------------------------------------------------------------------------------------------------------------------------------------------------------------------------------------------------------------------------------------|
|  |  |  |  |  |  | MRT04<br>MRV1<br>MS4A6A<br>MSI2<br>MSN<br>MSRB2<br>MSX1<br>MTA3<br>MTAP<br>MTBP<br>MTCH2<br>MTDH<br>MTF1<br>MTHFD2L<br>MTHFR<br>MTL5<br>MTMR14<br>MTMR3<br>MTMR7<br>MTMR9<br>MTPN<br>MTR<br>MTRF1L<br>MTUS1<br>MUC12<br>MUC15<br>MUC20<br>MUM1<br>MUSK<br>MVK<br>MXD1<br>MXRA7<br>MYADM<br>MYBL1<br>MYCN<br>MYEF2<br>MYH11<br>MYLIP<br>MYLK | LINGO2<br>LIPH<br>LIX1L<br>LMAN1<br>LMBRD1<br>LMBRD2<br>LMLN<br>LMNA<br>LMO2<br>LMO3<br>LMO4<br>LMO7<br>LNPEP<br>LNX1<br>LNX2<br>LOH12CR1<br>LONRF1<br>LONRF2<br>LOXL2<br>LOXL3<br>LOXL4<br>LPAR3<br>LPAR5<br>LPCAT2<br>LPP<br>LRCH1<br>LRCH2<br>LRCH3<br>LRFN2<br>LRFN4<br>LRFN5<br>LRG1<br>LRGUK<br>LRIG1<br>LRP10<br>LRP11<br>LRP3<br>LRPAP1<br>LRRC16A | HINT1<br>HIP1<br>HIPK2<br>HIPK3<br>HIST1H2BC<br>HIST1H3E<br>HIST1H4H<br>HIST3H2A<br>HIVEP2<br>HIVEP3<br>HKDC1<br>HLA-DOA<br>HLA-DPB1<br>HLA-DPB2<br>HM13<br>HMGB1<br>HMGB2<br>HMGB3<br>HMGCLL1<br>HMGCS2<br>HMX2<br>HN1<br>HNF4A<br>HNF4G<br>HNMT<br>HNRNPA0<br>HNRNPC<br>HNRNPD<br>HNRNPK<br>HNRNPM<br>HNRNPR<br>HOMER1<br>HOOK1<br>HOOK3<br>HORMAD2<br>HOXA13<br>HOXA3<br>HOXA7<br>HOXB13 |
|--|--|--|--|--|--|---------------------------------------------------------------------------------------------------------------------------------------------------------------------------------------------------------------------------------------------------------------------------------------------------------------------------------------------|------------------------------------------------------------------------------------------------------------------------------------------------------------------------------------------------------------------------------------------------------------------------------------------------------------------------------------------------------------|---------------------------------------------------------------------------------------------------------------------------------------------------------------------------------------------------------------------------------------------------------------------------------------------------------------------------------------------------------------------------------------------|

|  |  |  |  |  |  |                                                                                                                                                                                                                                                                                                                                                          |                                                                                                                                                                                                                                                                                                                                                                            |                                                                                                                                                                                                                                                                                                                                                                           |
|--|--|--|--|--|--|----------------------------------------------------------------------------------------------------------------------------------------------------------------------------------------------------------------------------------------------------------------------------------------------------------------------------------------------------------|----------------------------------------------------------------------------------------------------------------------------------------------------------------------------------------------------------------------------------------------------------------------------------------------------------------------------------------------------------------------------|---------------------------------------------------------------------------------------------------------------------------------------------------------------------------------------------------------------------------------------------------------------------------------------------------------------------------------------------------------------------------|
|  |  |  |  |  |  | MYNN<br>MYO10<br>MYO19<br>MYO1C<br>MYO1G<br>MYO9A<br>MYPN<br>MYT1L<br>N4BP2<br>N4BP2L2<br>N6AMT2<br>NAAA<br>NAB1<br>NADSYN1<br>NAF1<br>NAGS<br>NAIF1<br>NAIP<br>NAMPT<br>NANOS1<br>NAP1L5<br>NAPEPLD<br>NAPG<br>NARF<br>NARS<br>NAT14<br>NAT8L<br>NAV2<br>NBEA<br>NBN<br>NBPF3<br>NCAM1<br>NCOA5<br>NCOA7<br>NCOR1<br>NCOR2<br>NDFIP1<br>NDFIP2<br>NDNL2 | LRRC2<br>LRRC28<br>LRRC34<br>LRRC37A2<br>LRRC4<br>LRRC8A<br>LRRC8B<br>LRRC8E<br>LRRFIP1<br>LRRFIP2<br>LRRK2<br>LRRN1<br>LRRTM1<br>LSAMP<br>LSG1<br>LSM11<br>LSM14B<br>LTB4R<br>LTBP2<br>LTBP3<br>LTBR<br>LUC7L<br>LUC7L2<br>LUM<br>LYPD5<br>LYPD6<br>LYPLAL1<br>LYRM4<br>LYRM5<br>LYRM7<br>LYSMD1<br>LYSMD2<br>LYSMD3<br>LYSMD4<br>LZIC<br>MACF1<br>MAD2L1<br>MAEL<br>MAFB | HOXB3<br>HP1BP3<br>HPS1<br>HPS3<br>HRASLS5<br>HRK<br>HS2ST1<br>HS3ST3B1<br>HS3ST4<br>HS6ST1<br>HS6ST2<br>HS6ST3<br>HSD17B14<br>HSD3B1<br>HSDL1<br>HSF5<br>HSPA12B<br>HSPA1L<br>HSPA5<br>HSPA9<br>HSPB6<br>HSPB8<br>HSPD1<br>HSPH1<br>HTATIP2<br>HTRA3<br>HYI<br>ICA1<br>ICA1L<br>ICOSLG<br>ID4<br>IDH1<br>IDH3A<br>IER3IP1<br>IFIT2<br>IFIT3<br>IFNAR1<br>IFNGR1<br>IFRD1 |
|--|--|--|--|--|--|----------------------------------------------------------------------------------------------------------------------------------------------------------------------------------------------------------------------------------------------------------------------------------------------------------------------------------------------------------|----------------------------------------------------------------------------------------------------------------------------------------------------------------------------------------------------------------------------------------------------------------------------------------------------------------------------------------------------------------------------|---------------------------------------------------------------------------------------------------------------------------------------------------------------------------------------------------------------------------------------------------------------------------------------------------------------------------------------------------------------------------|

|  |  |  |  |  |  |                                                                                                                                                                                                                                                                                                                                                              |                                                                                                                                                                                                                                                                                                                                                                                   |                                                                                                                                                                                                                                                                                                                                                                          |
|--|--|--|--|--|--|--------------------------------------------------------------------------------------------------------------------------------------------------------------------------------------------------------------------------------------------------------------------------------------------------------------------------------------------------------------|-----------------------------------------------------------------------------------------------------------------------------------------------------------------------------------------------------------------------------------------------------------------------------------------------------------------------------------------------------------------------------------|--------------------------------------------------------------------------------------------------------------------------------------------------------------------------------------------------------------------------------------------------------------------------------------------------------------------------------------------------------------------------|
|  |  |  |  |  |  | NDUFA10<br>NDUFA2<br>NDUFB4<br>NDUFB9<br>NDUFS1<br>NEBL<br>NECAB1<br>NEDD4L<br>NEFM<br>NEGR1<br>NEIL2<br>NEK10<br>NEK9<br>NEO1<br>NEU3<br>NEU4<br>NEXN<br>NFASC<br>NFAT5<br>NFATC2<br>NFATC3<br>NFIB<br>NFIC<br>NFIX<br>NFKBIA<br>NFKBIB<br>NFKBIZ<br>NFRKB<br>NFYC<br>NGEF<br>NHLRC2<br>NHLRC3<br>NIN<br>NIPA1<br>NISCH<br>NKD1<br>NKIRAS1<br>NKTR<br>NLGN1 | MAFG<br>MAGI1<br>MAGI2<br>MAGI3<br>MAGOHB<br>MAGT1<br>MALAT1<br>MAMDC4<br>MAN2A1<br>MANEA<br>MANEAL<br>MAP1B<br>MAP1LC3A<br>MAP2<br>MAP3K15<br>MAP3K2<br>MAP3K3<br>MAP3K6<br>MAP4<br>MAP4K4<br>MAP6<br>MAP6D1<br>MAP7D2<br>MAP7D3<br>MAP9<br>MAPK1<br>MAPK1IP1L<br>MAPK4<br>MAPK8<br>MAPK8IP3<br>MAPRE3<br>MAPT<br>MARCKS<br>MARK1<br>MARK3<br>MARS2<br>MARVELD2<br>MAST4<br>MBD1 | IFT172<br>IFT52<br>IFT80<br>IFT81<br>IGF1<br>IGF1R<br>IGF2BP2<br>IGFBPL1<br>IGSF10<br>IGSF11<br>IGSF21<br>IGSF9<br>IK<br>IKZF2<br>IKZF4<br>IKZF5<br>IL17D<br>IL17RA<br>IL17RB<br>IL17RC<br>IL17RD<br>IL17RE<br>IL18BP<br>IL1RL1<br>IL20RA<br>IL20RB<br>IL6R<br>IL6ST<br>ILDR1<br>IMMP1L<br>IMPAD1<br>INADL<br>ING3<br>ING5<br>INHBA<br>INPP5F<br>INSM2<br>INSR<br>INTS10 |
|--|--|--|--|--|--|--------------------------------------------------------------------------------------------------------------------------------------------------------------------------------------------------------------------------------------------------------------------------------------------------------------------------------------------------------------|-----------------------------------------------------------------------------------------------------------------------------------------------------------------------------------------------------------------------------------------------------------------------------------------------------------------------------------------------------------------------------------|--------------------------------------------------------------------------------------------------------------------------------------------------------------------------------------------------------------------------------------------------------------------------------------------------------------------------------------------------------------------------|

|  |  |  |  |  |  |                                                                                                                                                                                                                                                                                                                                                      |                                                                                                                                                                                                                                                                                                                                                             |                                                                                                                                                                                                                                                                                                                                                              |
|--|--|--|--|--|--|------------------------------------------------------------------------------------------------------------------------------------------------------------------------------------------------------------------------------------------------------------------------------------------------------------------------------------------------------|-------------------------------------------------------------------------------------------------------------------------------------------------------------------------------------------------------------------------------------------------------------------------------------------------------------------------------------------------------------|--------------------------------------------------------------------------------------------------------------------------------------------------------------------------------------------------------------------------------------------------------------------------------------------------------------------------------------------------------------|
|  |  |  |  |  |  | NLGN2<br>NLK<br>NLRC3<br>NME7<br>NMNAT1<br>NMNAT3<br>NMRAL1<br>NMUR2<br>NNMT<br>NOB1<br>NOL10<br>NOL4<br>NOS1<br>NOTCH4<br>NOVA1<br>NOX4<br>NOXO1<br>NPAS3<br>NPC1L1<br>NPEPL1<br>NPFFR2<br>NPHP1<br>NPHP3<br>NPM1<br>NPNT<br>NQO2<br>NR1D2<br>NR2F2<br>NR3C1<br>NRAP<br>NRG4<br>NRM<br>NRP2<br>NRSN1<br>NRXN1<br>NSFL1C<br>NSMAF<br>NSUN4<br>NT5C1A | MBD6<br>MBNL1<br>MBNL3<br>MBOAT1<br>MBOAT2<br>MBP<br>MBTD1<br>MCC<br>MCEE<br>MCF2L<br>MCL1<br>MCM10<br>MCOLN2<br>MCOLN3<br>MCTP1<br>MCTP2<br>MCTS1<br>MDGA1<br>MDM4<br>ME3<br>MED1<br>MED10<br>MED11<br>MED13L<br>MED17<br>MED23<br>MED28<br>MED29<br>MED31<br>MEF2A<br>MEF2D<br>MEG3<br>MEI1<br>METAP2<br>METTL3<br>METTL4<br>METTL7A<br>METTL7B<br>METTL9 | INTS2<br>INTS4<br>INTS6<br>INTS9<br>INTU<br>IPO5<br>IPO9<br>IPPK<br>IQCH<br>IQGAP2<br>IQSEC2<br>IRAK1BP1<br>IRAK2<br>IREB2<br>IRF1<br>IRF2BP2<br>IRX2<br>IRX3<br>ISY1<br>ISYNA1<br>ITCH<br>ITFG3<br>ITGA1<br>ITGA2<br>ITGB2<br>ITGB4<br>ITGB8<br>ITGBL1<br>ITLN1<br>ITPR1<br>ITSN1<br>JAG1<br>JAGN1<br>JAKMIP1<br>JAKMIP3<br>JAM2<br>JAM3<br>JARID2<br>JAZF1 |
|--|--|--|--|--|--|------------------------------------------------------------------------------------------------------------------------------------------------------------------------------------------------------------------------------------------------------------------------------------------------------------------------------------------------------|-------------------------------------------------------------------------------------------------------------------------------------------------------------------------------------------------------------------------------------------------------------------------------------------------------------------------------------------------------------|--------------------------------------------------------------------------------------------------------------------------------------------------------------------------------------------------------------------------------------------------------------------------------------------------------------------------------------------------------------|

|  |  |  |  |  |  |                                                                                                                                                                                                                                                                                                                                                            |                                                                                                                                                                                                                                                                                                                                                         |                                                                                                                                                                                                                                                                                                                                                                      |
|--|--|--|--|--|--|------------------------------------------------------------------------------------------------------------------------------------------------------------------------------------------------------------------------------------------------------------------------------------------------------------------------------------------------------------|---------------------------------------------------------------------------------------------------------------------------------------------------------------------------------------------------------------------------------------------------------------------------------------------------------------------------------------------------------|----------------------------------------------------------------------------------------------------------------------------------------------------------------------------------------------------------------------------------------------------------------------------------------------------------------------------------------------------------------------|
|  |  |  |  |  |  | NT5DC1<br>NT5DC3<br>NT5E<br>NTN1<br>NTRK2<br>NUCB2<br>NUCKS1<br>NUDT16<br>NUDT21<br>NUDT4<br>NUDT6<br>NUDT7<br>NUFIP2<br>NUMBL<br>NUP153<br>NUP43<br>NUP50<br>NUP62<br>NUP93<br>NUPL1<br>NUS1<br>OAF<br>OAS2<br>OBFC1<br>OBP2A<br>OBSCN<br>OBSL1<br>OCAD2<br>ODF2<br>ODF2L<br>OGFRL1<br>OGT<br>OLA1<br>OLFM2<br>OMA1<br>OPA3<br>ORAI1<br>ORAOV1<br>OSBPL10 | MEX3B<br>MEX3D<br>MFHAS1<br>MFI2<br>MFSD11<br>MFSD4<br>MFSD9<br>MGA<br>MGAT3<br>MGAT4A<br>MGAT4C<br>MGAT5B<br>MGEA5<br>MGP<br>MGST1<br>MIB1<br>MICAL2<br>MICAL3<br>MIER1<br>MIPOL1<br>MITD1<br>MITF<br>MKKS<br>MKLN1<br>MKNK2<br>MKX<br>MLLT10<br>MLLT4<br>MLXIP<br>MLYCD<br>MMAB<br>MMD2<br>MMP15<br>MMP16<br>MNT<br>MON1B<br>MON2<br>MORC2<br>MORF4L1 | JDP2<br>JMJD1C<br>JMJD4<br>JMY<br>JPH1<br>JPH3<br>JUND<br>KAAG1<br>KAL1<br>KALRN<br>KANK1<br>KANK4<br>KATNAL1<br>KATNAL2<br>KBTBD3<br>KBTBD6<br>KBTBD7<br>KCMF1<br>KCNA1<br>KCNAB1<br>KCNB1<br>KCNC1<br>KCNC2<br>KCNC3<br>KCNC4<br>KCNH3<br>KCNH7<br>KCNIP2<br>KCNJ15<br>KCNJ16<br>KCNJ3<br>KCNJ6<br>KCNK10<br>KCNK17<br>KCNK3<br>KCNK4<br>KCNK6<br>KCNMA1<br>KCNMB2 |
|--|--|--|--|--|--|------------------------------------------------------------------------------------------------------------------------------------------------------------------------------------------------------------------------------------------------------------------------------------------------------------------------------------------------------------|---------------------------------------------------------------------------------------------------------------------------------------------------------------------------------------------------------------------------------------------------------------------------------------------------------------------------------------------------------|----------------------------------------------------------------------------------------------------------------------------------------------------------------------------------------------------------------------------------------------------------------------------------------------------------------------------------------------------------------------|

|  |  |  |  |  |  |                                                                                                                                                                                                                                                                                                                                                                      |                                                                                                                                                                                                                                                                                                                                                                 |                                                                                                                                                                                                                                                                                                                                                                                                                                                 |
|--|--|--|--|--|--|----------------------------------------------------------------------------------------------------------------------------------------------------------------------------------------------------------------------------------------------------------------------------------------------------------------------------------------------------------------------|-----------------------------------------------------------------------------------------------------------------------------------------------------------------------------------------------------------------------------------------------------------------------------------------------------------------------------------------------------------------|-------------------------------------------------------------------------------------------------------------------------------------------------------------------------------------------------------------------------------------------------------------------------------------------------------------------------------------------------------------------------------------------------------------------------------------------------|
|  |  |  |  |  |  | OSBPL7<br>OSBPL8<br>OSGEPL1<br>OSMR<br>OSTM1<br>OTUD4<br>OTUD6B<br>OTUD7B<br>OVOL1<br>OXCT2<br>OXR1<br>P2RX7<br>P2RY8<br>P4HA1<br>P4HA3<br>PACS1<br>PACSIN1<br>PACSIN2<br>PAIP2<br>PALMD<br>PAPD5<br>PAPLN<br>PAPOLA<br>PAPOLG<br>PAPPA<br>PAPPA2<br>PAQR8<br>PARD3B<br>PARP8<br>PARP9<br>PARS2<br>PARVA<br>PARVB<br>PATL1<br>PAWR<br>PAX6<br>PBRM1<br>PBX4<br>PCBP2 | MORF4L2<br>MOXD1<br>MPHOSPH8<br>MPHOSPH9<br>MPI<br>MPP5<br>MPPED1<br>MPZL1<br>MPZL2<br>MRAS<br>MREG<br>MRO<br>MRPL2<br>MRPL27<br>MRPL30<br>MRPL45<br>MRPL50<br>MRPS10<br>MRPS23<br>MRPS25<br>MRPS30<br>MRPS6<br>MRVI1<br>MS4A1<br>MS4A4A<br>MS4A6A<br>MSI2<br>MSN<br>MSRB2<br>MSX1<br>MTA3<br>MTAP<br>MTBP<br>MTCH2<br>MTCP1<br>MTDH<br>MTF1<br>MTFMT<br>MTHFD2 | KCNMB4<br>KCNQ4<br>KCNQ5<br>KCNRG<br>KCTD1<br>KCTD10<br>KCTD11<br>KCTD16<br>KCTD18<br>KCTD20<br>KCTD6<br>KDSR<br>KHDRBS1<br>KHSRP<br>KIAA0232<br>KIAA0319L<br>KIAA0368<br>KIAA0907<br>KIAA1147<br>KIAA1161<br>KIAA1211<br>KIAA1217<br>KIAA1244<br>KIAA1257<br>KIAA1324<br>KIAA1324L<br>KIAA1377<br>KIAA1407<br>KIAA1429<br>KIAA1462<br>KIAA1468<br>KIAA1522<br>KIAA1524<br>KIAA1549<br>KIAA1586<br>KIAA1683<br>KIAA1715<br>KIAA1841<br>KIAA1919 |
|--|--|--|--|--|--|----------------------------------------------------------------------------------------------------------------------------------------------------------------------------------------------------------------------------------------------------------------------------------------------------------------------------------------------------------------------|-----------------------------------------------------------------------------------------------------------------------------------------------------------------------------------------------------------------------------------------------------------------------------------------------------------------------------------------------------------------|-------------------------------------------------------------------------------------------------------------------------------------------------------------------------------------------------------------------------------------------------------------------------------------------------------------------------------------------------------------------------------------------------------------------------------------------------|

|  |  |  |  |  |  |                                                                                                                                                                                                                                                                                                                                                                     |                                                                                                                                                                                                                                                                                                                                                       |                                                                                                                                                                                                                                                                                                                                                                                 |
|--|--|--|--|--|--|---------------------------------------------------------------------------------------------------------------------------------------------------------------------------------------------------------------------------------------------------------------------------------------------------------------------------------------------------------------------|-------------------------------------------------------------------------------------------------------------------------------------------------------------------------------------------------------------------------------------------------------------------------------------------------------------------------------------------------------|---------------------------------------------------------------------------------------------------------------------------------------------------------------------------------------------------------------------------------------------------------------------------------------------------------------------------------------------------------------------------------|
|  |  |  |  |  |  | PCDH10<br>PCDH17<br>PCDH7<br>PCDHB14<br>PCDHB16<br>PCDHB2<br>PCDHB4<br>PCDHB6<br>PCDHB7<br>PCF11<br>PCGF3<br>PCGF5<br>PCM1<br>PCMTD2<br>PCNP<br>PCNT<br>PCNX<br>PCNXL2<br>PCSK6<br>PCSK9<br>PCYOX1<br>PDCD2<br>PDCD5<br>PDCD6IP<br>PDCD7<br>PDDC1<br>PDE1A<br>PDE3A<br>PDE4D<br>PDE8A<br>PDE8B<br>PDK1<br>PDK3<br>PDK4<br>PDLIM5<br>PDPN<br>PDS5B<br>PDXDC1<br>PDXK | MTHFR<br>MTHFSD<br>MTL5<br>MTMR12<br>MTMR3<br>MTMR6<br>MTMR7<br>MTMR9<br>MTO1<br>MTR<br>MTRF1L<br>MUC12<br>MUC17<br>MUC20<br>MUC4<br>MUM1<br>MVK<br>MXD1<br>MXRA7<br>MYBL1<br>MYCN<br>MYEF2<br>MYEOV2<br>MYH11<br>MYH14<br>MYL9<br>MYLIP<br>MYLK<br>MYO10<br>MYO1C<br>MYO1G<br>MYO5A<br>MYO9A<br>MYPN<br>MYRIP<br>MYT1L<br>N4BP2L1<br>N4BP2L2<br>NAB1 | KIAA1958<br>KIAA2013<br>KIAA2018<br>KIAA2022<br>KIDINS220<br>KIF16B<br>KIF19<br>KIF1A<br>KIF1B<br>KIF21A<br>KIF26B<br>KIF3A<br>KIF3B<br>KIF5A<br>KIF9<br>KIFC2<br>KIN<br>KIRREL2<br>KIRREL3<br>KLB<br>KLC1<br>KLC3<br>KLC4<br>KLF12<br>KLF13<br>KLF15<br>KLF3<br>KLF6<br>KLF8<br>KLF9<br>KLHDC8A<br>KLHDC9<br>KLHL1<br>KLHL12<br>KLHL13<br>KLHL15<br>KLHL23<br>KLHL24<br>KLHL28 |
|--|--|--|--|--|--|---------------------------------------------------------------------------------------------------------------------------------------------------------------------------------------------------------------------------------------------------------------------------------------------------------------------------------------------------------------------|-------------------------------------------------------------------------------------------------------------------------------------------------------------------------------------------------------------------------------------------------------------------------------------------------------------------------------------------------------|---------------------------------------------------------------------------------------------------------------------------------------------------------------------------------------------------------------------------------------------------------------------------------------------------------------------------------------------------------------------------------|



|  |  |  |  |  |  |                                                                                                                                                                                                                                                                                                                                                                   |                                                                                                                                                                                                                                                                                                                                                                  |                                                                                                                                                                                                                                                                                                                                                                          |
|--|--|--|--|--|--|-------------------------------------------------------------------------------------------------------------------------------------------------------------------------------------------------------------------------------------------------------------------------------------------------------------------------------------------------------------------|------------------------------------------------------------------------------------------------------------------------------------------------------------------------------------------------------------------------------------------------------------------------------------------------------------------------------------------------------------------|--------------------------------------------------------------------------------------------------------------------------------------------------------------------------------------------------------------------------------------------------------------------------------------------------------------------------------------------------------------------------|
|  |  |  |  |  |  | PDZD2<br>PDZD4<br>PELI3<br>PERP<br>PEX13<br>PEX26<br>PEX5L<br>PFKFB2<br>PGBD1<br>PGK1<br>PGLS<br>PGM2L1<br>PGM5<br>PGPEP1<br>PGR<br>PHACTR2<br>PHACTR4<br>PHC2<br>PHF10<br>PHF11<br>PHF20<br>PHF20L1<br>PHF21A<br>PHF5A<br>PHF6<br>PHF8<br>PHLDA2<br>PHLDB2<br>PHLDB3<br>PHPT1<br>PHYHD1<br>PHYHIPL<br>PIF1<br>PIGK<br>PIGL<br>PIGS<br>PINX1<br>PITPNC1<br>PKD1L2 | NADSYN1<br>NAGS<br>NAIF1<br>NAIP<br>NAMPT<br>NANOS1<br>NANP<br>NAP1L5<br>NAPEPLD<br>NAPG<br>NARF<br>NARS<br>NAT14<br>NAT8L<br>NAV1<br>NAV2<br>NBEA<br>NBN<br>NBPF3<br>NCDN<br>NCOA5<br>NCOA7<br>NCOR2<br>NCSTN<br>NDFIP1<br>NDFIP2<br>NDNL2<br>NDUFA10<br>NDUFA11<br>NDUFA2<br>NDUFAF2<br>NDUFB4<br>NDUFV3<br>NEBL<br>NECAB1<br>NECAP2<br>NEDD1<br>NEDD9<br>NEFM | KLHL29<br>KLHL5<br>KLHL6<br>KLHL7<br>KLHL8<br>KLHL9<br>KLK12<br>KLRG2<br>KNDC1<br>KPNA4<br>KRBA1<br>KRCC1<br>KRIT1<br>KRT19<br>KRT73<br>KRT80<br>KRTAP3-2<br>KRTAP4-1<br>KRTCAP2<br>KSR1<br>KSR2<br>L3MBTL2<br>L3MBTL3<br>L3MBTL4<br>LACTB2<br>LAMA1<br>LAMA3<br>LAMB4<br>LAMP2<br>LANCL2<br>LARP1<br>LARP4<br>LARP6<br>LATS1<br>LATS2<br>LAYN<br>LCA5<br>LCA5L<br>LCN12 |
|--|--|--|--|--|--|-------------------------------------------------------------------------------------------------------------------------------------------------------------------------------------------------------------------------------------------------------------------------------------------------------------------------------------------------------------------|------------------------------------------------------------------------------------------------------------------------------------------------------------------------------------------------------------------------------------------------------------------------------------------------------------------------------------------------------------------|--------------------------------------------------------------------------------------------------------------------------------------------------------------------------------------------------------------------------------------------------------------------------------------------------------------------------------------------------------------------------|

|  |  |  |  |  |  |                                                                                                                                                                                                                                                                                                                                                                                       |                                                                                                                                                                                                                                                                                                                                                                     |                                                                                                                                                                                                                                                                                                                                                       |
|--|--|--|--|--|--|---------------------------------------------------------------------------------------------------------------------------------------------------------------------------------------------------------------------------------------------------------------------------------------------------------------------------------------------------------------------------------------|---------------------------------------------------------------------------------------------------------------------------------------------------------------------------------------------------------------------------------------------------------------------------------------------------------------------------------------------------------------------|-------------------------------------------------------------------------------------------------------------------------------------------------------------------------------------------------------------------------------------------------------------------------------------------------------------------------------------------------------|
|  |  |  |  |  |  | PKIA<br>PKIB<br>PKP4<br>PLAA<br>PLCD4<br>PLCXD1<br>PLCXD3<br>PLD1<br>PLD4<br>PLEKHA3<br>PLEKHA5<br>PLEKHA6<br>PLEKHA7<br>PLEKHB2<br>PLEKHF2<br>PLEKHG1<br>PLEKHG2<br>PLEKHH2<br>PLEKHH3<br>PLSCR1<br>PLXDC2<br>PLXNA2<br>PLXNA4<br>PLXNC1<br>PM20D1<br>PMCHL1<br>PMEPA1<br>PNMA3<br>PNPLA5<br>PNPLA7<br>PNPLA8<br>PNPT1<br>PODN<br>POGK<br>POLB<br>POLD3<br>POLE4<br>POLR1D<br>POLR1E | NEGR1<br>NEIL2<br>NEK10<br>NEK9<br>NETO2<br>NEU3<br>NEXN<br>NF2<br>NFASC<br>NFAT5<br>NFATC2<br>NFATC2IP<br>NFE2L3<br>NFIB<br>NFIK<br>NFKBIA<br>NFKBIB<br>NFKBIZ<br>NFYB<br>NHLRC2<br>NHLRC3<br>NHP2L1<br>NIPA1<br>NIPSNAP3A<br>NIPSNAP3B<br>NISCH<br>NKAPL<br>NKIRAS1<br>NLGN1<br>NLK<br>NLRC3<br>NLRP2<br>NLRP7<br>NMD3<br>NME7<br>NMNAT3<br>NMUR2<br>NNMT<br>NOD1 | LCOR<br>LCORL<br>LCP2<br>LDB2<br>LDLRAD3<br>LDOC1L<br>LELP1<br>LENG1<br>LENG8<br>LEPROT<br>LFNG<br>LGR6<br>LHFP<br>LHFPL4<br>LIFR<br>LIG4<br>LIMCH1<br>LIN37<br>LIN52<br>LIN54<br>LIN7B<br>LIN9<br>LINGO1<br>LINGO2<br>LIPH<br>LIX1L<br>LMAN1<br>LMBR1<br>LMBRD1<br>LMBRD2<br>LMCD1<br>LMLN<br>LMNA<br>LMO2<br>LMO3<br>LMO4<br>LMO7<br>LMOD2<br>LNPEP |
|--|--|--|--|--|--|---------------------------------------------------------------------------------------------------------------------------------------------------------------------------------------------------------------------------------------------------------------------------------------------------------------------------------------------------------------------------------------|---------------------------------------------------------------------------------------------------------------------------------------------------------------------------------------------------------------------------------------------------------------------------------------------------------------------------------------------------------------------|-------------------------------------------------------------------------------------------------------------------------------------------------------------------------------------------------------------------------------------------------------------------------------------------------------------------------------------------------------|

|  |  |  |  |  |  |                                                                                                                                                                                                                                                                                                                                                                                                |                                                                                                                                                                                                                                                                                                                                                    |                                                                                                                                                                                                                                                                                                                                                                             |
|--|--|--|--|--|--|------------------------------------------------------------------------------------------------------------------------------------------------------------------------------------------------------------------------------------------------------------------------------------------------------------------------------------------------------------------------------------------------|----------------------------------------------------------------------------------------------------------------------------------------------------------------------------------------------------------------------------------------------------------------------------------------------------------------------------------------------------|-----------------------------------------------------------------------------------------------------------------------------------------------------------------------------------------------------------------------------------------------------------------------------------------------------------------------------------------------------------------------------|
|  |  |  |  |  |  | POLR2J2<br>POLR2J4<br>POLR3G<br>POLR3GL<br>POMT2<br>POU2F1<br>PPAPDC1B<br>PPAPDC2<br>PPAPDC3<br>PPARA<br>PPARD<br>PPIA<br>PPIE<br>PPIL2<br>PPM1A<br>PPM1D<br>PPM1E<br>PPM1H<br>PPM1K<br>PPM1L<br>PPOX<br>PPP1CB<br>PPP1R14C<br>PPP1R16A<br>PPP1R1A<br>PPP1R2<br>PPP1R3C<br>PPP1R3E<br>PPP1R3F<br>PPP1R9A<br>PPP1R9B<br>PPP2CA<br>PPP2R2D<br>PPP4R2<br>PPP6C<br>PPTC7<br>PQLC1<br>PRCP<br>PRDM1 | NOL10<br>NOL4<br>NOL6<br>NOM1<br>NOS1<br>NOSTRIN<br>NOTCH4<br>NOVA1<br>NPAS3<br>NPC1L1<br>NPEPL1<br>NPFFR2<br>NPM1<br>NPM2<br>NQO2<br>NR1H4<br>NR2F2<br>NR3C1<br>NRAP<br>NRD1<br>NRG2<br>NRG4<br>NRIP3<br>NRM<br>NRP2<br>NRXN1<br>NRXN3<br>NSD1<br>NSUN4<br>NSUN7<br>NT5C1A<br>NT5DC1<br>NT5DC3<br>NT5E<br>NTN1<br>NTN4<br>NTRK2<br>NTRK3<br>NUCB2 | LNX1<br>LNX2<br>LOH12CR1<br>LONRF1<br>LONRF2<br>LOXL2<br>LOXL3<br>LOXL4<br>LPAR3<br>LPAR5<br>LPCAT2<br>LPGAT1<br>LPP<br>LRCH1<br>LRCH2<br>LRCH3<br>LRFN2<br>LRFN4<br>LRFN5<br>LRG1<br>LRGUK<br>LRIG1<br>LRP10<br>LRP11<br>LRP3<br>LRPAP1<br>LRRC16A<br>LRRC2<br>LRRC28<br>LRRC34<br>LRRC37A2<br>LRRC4<br>LRRC56<br>LRRC6<br>LRRC8A<br>LRRC8B<br>LRRC8E<br>LRRCC1<br>LRRFIP1 |
|--|--|--|--|--|--|------------------------------------------------------------------------------------------------------------------------------------------------------------------------------------------------------------------------------------------------------------------------------------------------------------------------------------------------------------------------------------------------|----------------------------------------------------------------------------------------------------------------------------------------------------------------------------------------------------------------------------------------------------------------------------------------------------------------------------------------------------|-----------------------------------------------------------------------------------------------------------------------------------------------------------------------------------------------------------------------------------------------------------------------------------------------------------------------------------------------------------------------------|

|  |  |  |  |  |  |                                                                                                                                                                                                                                                                                                                                                                                  |                                                                                                                                                                                                                                                                                                                                                                   |                                                                                                                                                                                                                                                                                                                                                                  |
|--|--|--|--|--|--|----------------------------------------------------------------------------------------------------------------------------------------------------------------------------------------------------------------------------------------------------------------------------------------------------------------------------------------------------------------------------------|-------------------------------------------------------------------------------------------------------------------------------------------------------------------------------------------------------------------------------------------------------------------------------------------------------------------------------------------------------------------|------------------------------------------------------------------------------------------------------------------------------------------------------------------------------------------------------------------------------------------------------------------------------------------------------------------------------------------------------------------|
|  |  |  |  |  |  | PRDM11<br>PRELID1<br>PRELID2<br>PREPL<br>PREX1<br>PRICKLE2<br>PRKAA1<br>PRKAB2<br>PRKACB<br>PRKAG3<br>PRKAR1A<br>PRKAR2A<br>PRKCE<br>PRKCH<br>PRKD2<br>PRKD3<br>PRKG1<br>PRKRA<br>PRLHR<br>PRLR<br>PRMT2<br>PRMT6<br>PROX1<br>PRPF38A<br>PRPF38B<br>PRPF8<br>PRR12<br>PRR15<br>PRRC1<br>PRRX1<br>PRSS23<br>PRSS27<br>PRTFDC1<br>PSD2<br>PSEN1<br>PSMA8<br>PSMC2<br>PSMF1<br>PSPH | NUCKS1<br>NUDT10<br>NUDT21<br>NUDT4<br>NUDT7<br>NUF2<br>NUFIP2<br>NUMA1<br>NUMBL<br>NUP37<br>NUP93<br>NUS1<br>OAF<br>OAS3<br>OAZ1<br>OBFC1<br>OBP2A<br>OBSCN<br>OCLN<br>ODF2<br>OGFRL1<br>OGN<br>OGT<br>OLFM2<br>OMA1<br>ONECUT2<br>OPN3<br>OR51E1<br>OR51E2<br>ORAI1<br>ORAI2<br>ORAOV1<br>ORMDL1<br>ORMDL3<br>OSBPL10<br>OSBPL11<br>OSBPL6<br>OSBPL8<br>OSGEPL1 | LRRFIP2<br>LRRIQ1<br>LRRK2<br>LRRN1<br>LRRTM1<br>LSAMP<br>LSG1<br>LSM10<br>LSM11<br>LSM14B<br>LTB4R<br>LTBP2<br>LTBP3<br>LTBR<br>LUC7L<br>LUC7L2<br>LUM<br>LY6K<br>LYAR<br>LYPD5<br>LYPD6<br>LYPLAL1<br>LYRM4<br>LYRM5<br>LYRM7<br>LYSMD1<br>LYSMD2<br>LYSMD3<br>LYSMD4<br>LZIC<br>LZTS2<br>MACF1<br>MACROD2<br>MAD2L1<br>MAEL<br>MAFB<br>MAFG<br>MAGI1<br>MAGI2 |
|--|--|--|--|--|--|----------------------------------------------------------------------------------------------------------------------------------------------------------------------------------------------------------------------------------------------------------------------------------------------------------------------------------------------------------------------------------|-------------------------------------------------------------------------------------------------------------------------------------------------------------------------------------------------------------------------------------------------------------------------------------------------------------------------------------------------------------------|------------------------------------------------------------------------------------------------------------------------------------------------------------------------------------------------------------------------------------------------------------------------------------------------------------------------------------------------------------------|

|  |  |  |  |  |  |                                                                                                                                                                                                                                                                                                                                                                 |                                                                                                                                                                                                                                                                                                                                                                |                                                                                                                                                                                                                                                                                                                                                                                          |
|--|--|--|--|--|--|-----------------------------------------------------------------------------------------------------------------------------------------------------------------------------------------------------------------------------------------------------------------------------------------------------------------------------------------------------------------|----------------------------------------------------------------------------------------------------------------------------------------------------------------------------------------------------------------------------------------------------------------------------------------------------------------------------------------------------------------|------------------------------------------------------------------------------------------------------------------------------------------------------------------------------------------------------------------------------------------------------------------------------------------------------------------------------------------------------------------------------------------|
|  |  |  |  |  |  | PTCD3<br>PTCHD1<br>PTEN<br>PTGER1<br>PTGS1<br>PTK2<br>PTPLAD1<br>PTPMT1<br>PTPN1<br>PTPN13<br>PTPN14<br>PTPN2<br>PTPN21<br>PTPN3<br>PTPRB<br>PTPRE<br>PTPRJ<br>PTPRK<br>PUM2<br>PURB<br>PUS10<br>PVR<br>PVRL2<br>PVRL4<br>P XK<br>PYGO1<br>PYGO2<br>QDPR<br>QKI<br>QRSL1<br>QSER1<br>RAB10<br>RAB11FIP1<br>RAB12<br>RAB18<br>RAB1A<br>RAB21<br>RAB27A<br>RAB27B | OSMR<br>OSTM1<br>OTOP2<br>OTUB2<br>OTUD1<br>OTUD4<br>OTUD6B<br>OXCT2<br>OXR1<br>P2RY8<br>P4HA3<br>PABPC1L<br>PACS1<br>PACSIN1<br>PAG1<br>PAIP2<br>PAK1<br>PAK3<br>PANX1<br>PAPD4<br>PAPLN<br>PAPOLA<br>PAPOLG<br>PAPPA2<br>PAQR5<br>PAQR8<br>PARD3B<br>PARP14<br>PARP9<br>PARS2<br>PARVB<br>PARVG<br>PATL1<br>PAWR<br>PAX6<br>PBRM1<br>PCBP2<br>PCCA<br>PCDH10 | MAGI3<br>MAGOHB<br>MAGT1<br>MAL2<br>MALAT1<br>MAMDC2<br>MAMDC4<br>MAML2<br>MAN2A1<br>MAN2C1<br>MANBAL<br>MANEA<br>MANEAL<br>MAP1B<br>MAP1LC3A<br>MAP2<br>MAP2K7<br>MAP3K1<br>MAP3K13<br>MAP3K15<br>MAP3K2<br>MAP3K3<br>MAP3K6<br>MAP3K8<br>MAP4<br>MAP4K4<br>MAP6<br>MAP6D1<br>MAP7D2<br>MAP7D3<br>MAP9<br>MAPK1<br>MAPK15<br>MAPK1IP1L<br>MAPK4<br>MAPK6<br>MAPK8<br>MAPK8IP3<br>MAPRE3 |
|--|--|--|--|--|--|-----------------------------------------------------------------------------------------------------------------------------------------------------------------------------------------------------------------------------------------------------------------------------------------------------------------------------------------------------------------|----------------------------------------------------------------------------------------------------------------------------------------------------------------------------------------------------------------------------------------------------------------------------------------------------------------------------------------------------------------|------------------------------------------------------------------------------------------------------------------------------------------------------------------------------------------------------------------------------------------------------------------------------------------------------------------------------------------------------------------------------------------|

|  |  |  |  |  |  |                                                                                                                                                                                                                                                                                                                                                                                        |                                                                                                                                                                                                                                                                                                                                                                                   |                                                                                                                                                                                                                                                                                                                                                           |
|--|--|--|--|--|--|----------------------------------------------------------------------------------------------------------------------------------------------------------------------------------------------------------------------------------------------------------------------------------------------------------------------------------------------------------------------------------------|-----------------------------------------------------------------------------------------------------------------------------------------------------------------------------------------------------------------------------------------------------------------------------------------------------------------------------------------------------------------------------------|-----------------------------------------------------------------------------------------------------------------------------------------------------------------------------------------------------------------------------------------------------------------------------------------------------------------------------------------------------------|
|  |  |  |  |  |  | RAB28<br>RAB2B<br>RAB30<br>RAB32<br>RAB39B<br>RAB3B<br>RAB3C<br>RAB3D<br>RAB3IP<br>RAB40B<br>RAB5A<br>RAB7A<br>RAB8B<br>RAB9B<br>RABEP1<br>RABGAP1L<br>RAD23B<br>RAD52<br>RAI1<br>RALGPS1<br>RANBP9<br>RANGRF<br>RAP1A<br>RAP2A<br>RAPGEF2<br>RAPGEF6<br>RAPH1<br>RASA2<br>RASA3<br>RASAL1<br>RASD1<br>RASEF<br>RASGEF1A<br>RASGRP3<br>RASIP1<br>RASL11A<br>RASSF4<br>RASSF5<br>RASSF6 | PCDH17<br>PCDH7<br>PCDH9<br>PCDHAC2<br>PCDHB13<br>PCDHB14<br>PCDHB15<br>PCDHB16<br>PCDHB2<br>PCDHB4<br>PCDHB5<br>PCDHB6<br>PCDHB7<br>PCDHB9<br>PCDHGC5<br>PCF11<br>PCGF3<br>PCGF5<br>PCMTD1<br>PCMTD2<br>PCNP<br>PCNT<br>PCNX<br>PCSK9<br>PCYT1B<br>PDCD2L<br>PDCD6IP<br>PDCD7<br>PDE1A<br>PDE1C<br>PDE4A<br>PDE4D<br>PDE5A<br>PDE7A<br>PDE8A<br>PDE8B<br>PDE9A<br>PDGFC<br>PDGFD | MAPT<br>MARCKS<br>MARK1<br>MARK3<br>MARS2<br>MARVELD2<br>MARVELD3<br>MAST4<br>MASTL<br>MAT2B<br>MATR3<br>MBD1<br>MBD6<br>MBNL1<br>MBNL3<br>MBOAT1<br>MBOAT2<br>MBP<br>MBTD1<br>MCC<br>MCEE<br>MCF2L<br>MCL1<br>MCM10<br>MCOLN2<br>MCOLN3<br>MCTP1<br>MCTP2<br>MCTS1<br>MDGA1<br>MDH1B<br>MDM2<br>MDM4<br>ME3<br>MED1<br>MED10<br>MED11<br>MED13L<br>MED17 |
|--|--|--|--|--|--|----------------------------------------------------------------------------------------------------------------------------------------------------------------------------------------------------------------------------------------------------------------------------------------------------------------------------------------------------------------------------------------|-----------------------------------------------------------------------------------------------------------------------------------------------------------------------------------------------------------------------------------------------------------------------------------------------------------------------------------------------------------------------------------|-----------------------------------------------------------------------------------------------------------------------------------------------------------------------------------------------------------------------------------------------------------------------------------------------------------------------------------------------------------|

|  |  |  |  |  |  |                                                                                                                                                                                                                                                                                                                                                       |                                                                                                                                                                                                                                                                                                                                                              |                                                                                                                                                                                                                                                                                                                                                                    |
|--|--|--|--|--|--|-------------------------------------------------------------------------------------------------------------------------------------------------------------------------------------------------------------------------------------------------------------------------------------------------------------------------------------------------------|--------------------------------------------------------------------------------------------------------------------------------------------------------------------------------------------------------------------------------------------------------------------------------------------------------------------------------------------------------------|--------------------------------------------------------------------------------------------------------------------------------------------------------------------------------------------------------------------------------------------------------------------------------------------------------------------------------------------------------------------|
|  |  |  |  |  |  | RASSF8<br>RAVER2<br>RBBP6<br>RBBP9<br>RBM11<br>RBM12B<br>RBM14<br>RBM17<br>RBM18<br>RBM41<br>RBM47<br>RBM8A<br>RBMS1<br>RBMS2<br>RBPJ<br>RC3H2<br>RCAN3<br>RCBTB1<br>RCC2<br>RCOR1<br>RCOR3<br>REC8<br>REG3G<br>REG4<br>RELL1<br>RELT<br>REPIN1<br>REPS1<br>REPS2<br>RERG<br>REV3L<br>RFESD<br>RFT1<br>RFTN2<br>RFX1<br>RFX2<br>RFX4<br>RFXAP<br>RGMA | PDIA3<br>PDIK1L<br>PDK1<br>PDK3<br>PDK4<br>PDLIM3<br>PDLIM5<br>PDPR<br>PDS5B<br>PDXDC1<br>PDXK<br>PDZD2<br>PDZD8<br>PEBP4<br>PECR<br>PELI3<br>PENK<br>PERP<br>PEX26<br>PEX5L<br>PFKFB1<br>PFKFB2<br>PFKP<br>PGAP1<br>PGBD4<br>PGK1<br>PGLS<br>PGM2L1<br>PGR<br>PHACTR1<br>PHACTR2<br>PHACTR4<br>PHC3<br>PHF13<br>PHF14<br>PHF20<br>PHF20L1<br>PHF21A<br>PHF6 | MED19<br>MED23<br>MED28<br>MED29<br>MED31<br>MED4<br>MEF2A<br>MEF2D<br>MEG3<br>MEI1<br>MEIS3<br>METAP2<br>METTL3<br>METTL4<br>METTL7A<br>METTL7B<br>METTL9<br>MEX3B<br>MEX3C<br>MEX3D<br>MFHAS1<br>MFI2<br>MFSD11<br>MFSD4<br>MFSD9<br>MGA<br>MGAT3<br>MGAT4A<br>MGAT4C<br>MGAT5B<br>MGEA5<br>MGP<br>MGST1<br>MIB1<br>MICAL2<br>MICAL3<br>MICALL2<br>MIDN<br>MIER1 |
|--|--|--|--|--|--|-------------------------------------------------------------------------------------------------------------------------------------------------------------------------------------------------------------------------------------------------------------------------------------------------------------------------------------------------------|--------------------------------------------------------------------------------------------------------------------------------------------------------------------------------------------------------------------------------------------------------------------------------------------------------------------------------------------------------------|--------------------------------------------------------------------------------------------------------------------------------------------------------------------------------------------------------------------------------------------------------------------------------------------------------------------------------------------------------------------|

|  |  |  |  |  |  |                                                                                                                                                                                                                                                                                                                                                                       |                                                                                                                                                                                                                                                                                                                                                                                            |                                                                                                                                                                                                                                                                                                                                                         |
|--|--|--|--|--|--|-----------------------------------------------------------------------------------------------------------------------------------------------------------------------------------------------------------------------------------------------------------------------------------------------------------------------------------------------------------------------|--------------------------------------------------------------------------------------------------------------------------------------------------------------------------------------------------------------------------------------------------------------------------------------------------------------------------------------------------------------------------------------------|---------------------------------------------------------------------------------------------------------------------------------------------------------------------------------------------------------------------------------------------------------------------------------------------------------------------------------------------------------|
|  |  |  |  |  |  | RGMB<br>RGS16<br>RGS22<br>RGS5<br>RGS7BP<br>RHBDD2<br>RHEB<br>RHOA<br>RHOB<br>RHOC<br>RHOJ<br>RHOT1<br>RHOV<br>RIMBP2<br>RIMS2<br>RIMS4<br>RIN2<br>RIOK1<br>RIPK4<br>RIT1<br>RNASEH1<br>RNASEL<br>RNF130<br>RNF14<br>RNF145<br>RNF146<br>RNF150<br>RNF157<br>RNF169<br>RNF180<br>RNF182<br>RNF185<br>RNF19A<br>RNF213<br>RNF214<br>RNF215<br>RNF219<br>RNF24<br>RNF38 | PHKA1<br>PHLDA1<br>PHLDB2<br>PHLDB3<br>PHPT1<br>PHTF1<br>PHYHIPL<br>PID1<br>PIGG<br>PIGK<br>PIGN<br>PIGR<br>PIGS<br>PIK3AP1<br>PITPNC1<br>PITPNM2<br>PITRM1<br>PIWIL4<br>PKHD1<br>PKIA<br>PKIB<br>PLA2G12A<br>PLAA<br>PLCG2<br>PLCXD1<br>PLCXD3<br>PLD1<br>PLEKHA1<br>PLEKHA5<br>PLEKHA6<br>PLEKHA7<br>PLEKHB1<br>PLEKHB2<br>PLEKHF2<br>PLEKHG2<br>PLEKHG4<br>PLEKHH1<br>PLEKHH3<br>PLSCR1 | MINA<br>MIPOL1<br>MITD1<br>MITF<br>MKKS<br>MKLN1<br>MKNK2<br>MKX<br>MLKL<br>MLLT1<br>MLLT10<br>MLLT4<br>MLLT6<br>MLXIP<br>MLYCD<br>MMAA<br>MMAB<br>MMD<br>MMD2<br>MMP15<br>MMP16<br>MNT<br>MOGAT3<br>MON1B<br>MON2<br>MORC2<br>MORF4L1<br>MORF4L2<br>MORN3<br>MOXD1<br>MPHOSPH8<br>MPHOSPH9<br>MPI<br>MPP5<br>MPP7<br>MPPED1<br>MPZL1<br>MPZL2<br>MPZL3 |
|--|--|--|--|--|--|-----------------------------------------------------------------------------------------------------------------------------------------------------------------------------------------------------------------------------------------------------------------------------------------------------------------------------------------------------------------------|--------------------------------------------------------------------------------------------------------------------------------------------------------------------------------------------------------------------------------------------------------------------------------------------------------------------------------------------------------------------------------------------|---------------------------------------------------------------------------------------------------------------------------------------------------------------------------------------------------------------------------------------------------------------------------------------------------------------------------------------------------------|



|  |  |  |  |  |  |                                                                                                                                                                                                                                                                                                                                                                         |                                                                                                                                                                                                                                                                                                                                                                                |                                                                                                                                                                                                                                                                                                                                                                |
|--|--|--|--|--|--|-------------------------------------------------------------------------------------------------------------------------------------------------------------------------------------------------------------------------------------------------------------------------------------------------------------------------------------------------------------------------|--------------------------------------------------------------------------------------------------------------------------------------------------------------------------------------------------------------------------------------------------------------------------------------------------------------------------------------------------------------------------------|----------------------------------------------------------------------------------------------------------------------------------------------------------------------------------------------------------------------------------------------------------------------------------------------------------------------------------------------------------------|
|  |  |  |  |  |  | RNPC3<br>RNPS1<br>ROBO2<br>ROCK1<br>ROR1<br>RORB<br>RPA1<br>RPAIN<br>RPGRIP1L<br>RPL10A<br>RPL14<br>RPL15<br>RPL18<br>RPL19<br>RPL22L1<br>RPL27<br>RPL32P3<br>RPL34<br>RPL35<br>RPL36A<br>RPL6<br>RPL7<br>RPL9<br>RPS10<br>RPS14<br>RPS15A<br>RPS19<br>RPS19BP1<br>RPS25<br>RPS27<br>RPS5<br>RPS6<br>RPS6KA3<br>RPS6KA6<br>RPS6KL1<br>RPS7<br>RPU3D3<br>RPU3D4<br>RRBP1 | PLSCR2<br>PLXNA2<br>PLXNA4<br>PLXNC1<br>PM20D1<br>PMCHL1<br>PMEPA1<br>PML<br>PNMA3<br>PNPLA7<br>PNPLA8<br>PNPT1<br>PODN<br>POLD3<br>POLE4<br>POLH<br>POLI<br>POLR1D<br>POLR2J2<br>POLR2J4<br>POLR3E<br>POLR3GL<br>POMT2<br>POU2F1<br>POU2F2<br>PPAPDC1B<br>PPAPDC3<br>PPARA<br>PPARD<br>PPHLN1<br>PPIA<br>PPIL2<br>PPIL3<br>PPM1A<br>PPM1E<br>PPM1H<br>PPM1K<br>PPM1L<br>PPME1 | MR1<br>MRAS<br>MRE11A<br>MREG<br>MRO<br>MRPL2<br>MRPL27<br>MRPL30<br>MRPL32<br>MRPL37<br>MRPL43<br>MRPL44<br>MRPL45<br>MRPL50<br>MRPL54<br>MRPS10<br>MRPS23<br>MRPS25<br>MRPS26<br>MRPS30<br>MRPS6<br>MRTO4<br>MRVI1<br>MS4A1<br>MS4A4A<br>MS4A6A<br>MSI2<br>MSN<br>MSRB2<br>MSX1<br>MTA3<br>MTAP<br>MTBP<br>MTCH2<br>MTCP1<br>MTDH<br>MTF1<br>MTFMT<br>MTHFD2 |
|--|--|--|--|--|--|-------------------------------------------------------------------------------------------------------------------------------------------------------------------------------------------------------------------------------------------------------------------------------------------------------------------------------------------------------------------------|--------------------------------------------------------------------------------------------------------------------------------------------------------------------------------------------------------------------------------------------------------------------------------------------------------------------------------------------------------------------------------|----------------------------------------------------------------------------------------------------------------------------------------------------------------------------------------------------------------------------------------------------------------------------------------------------------------------------------------------------------------|

|  |  |  |  |  |  |                                                                                                                                                                                                                                                                                                                                                                            |                                                                                                                                                                                                                                                                                                                                                                                                                 |                                                                                                                                                                                                                                                                                                                                                     |
|--|--|--|--|--|--|----------------------------------------------------------------------------------------------------------------------------------------------------------------------------------------------------------------------------------------------------------------------------------------------------------------------------------------------------------------------------|-----------------------------------------------------------------------------------------------------------------------------------------------------------------------------------------------------------------------------------------------------------------------------------------------------------------------------------------------------------------------------------------------------------------|-----------------------------------------------------------------------------------------------------------------------------------------------------------------------------------------------------------------------------------------------------------------------------------------------------------------------------------------------------|
|  |  |  |  |  |  | RRM2B<br>RSBN1<br>RSPH1<br>RSPO1<br>RSRC1<br>RTBDN<br>RTN3<br>RUFY3<br>RUNDC1<br>RUNX1T1<br>RWDD2A<br>RYBP<br>S100A10<br>S100PBP<br>S1PR5<br>SALL1<br>SALL4<br>SAMD1<br>SAMD12<br>SAMD13<br>SAMD3<br>SAMD5<br>SAMM50<br>SAP30BP<br>SARDH<br>SART1<br>SASH1<br>SAV1<br>SBF2<br>SCAF1<br>SCAMP4<br>SCAMP5<br>SCAND1<br>SCARB1<br>SCARB2<br>SCD5<br>SCFD1<br>SCGB3A1<br>SCN2B | PPP1R12C<br>PPP1R14A<br>PPP1R14C<br>PPP1R16A<br>PPP1R16B<br>PPP1R1A<br>PPP1R1B<br>PPP1R1C<br>PPP1R3B<br>PPP1R3C<br>PPP1R3E<br>PPP1R3F<br>PPP1R9A<br>PPP1R9B<br>PPP2R2A<br>PPP2R2D<br>PPP2R3C<br>PPP4R2<br>PPP6C<br>PQLC1<br>PRDM1<br>PRDM11<br>PRDM16<br>PREPL<br>PREX1<br>PRICKLE1<br>PRICKLE2<br>PRKAB2<br>PRKACB<br>PRKAG2<br>PRKAR1A<br>PRKCE<br>PRKCH<br>PRKD3<br>PRKRA<br>PRLR<br>PRMT2<br>PRNT<br>PRODH2 | MTHFD2L<br>MTHFR<br>MTHFSD<br>MTL5<br>MTMR12<br>MTMR14<br>MTMR3<br>MTMR6<br>MTMR7<br>MTMR9<br>MTO1<br>MTPN<br>MTR<br>MTRF1L<br>MTUS1<br>MUC12<br>MUC15<br>MUC17<br>MUC20<br>MUC4<br>MUM1<br>MUSK<br>MVK<br>MXD1<br>MXRA7<br>MYADM<br>MYBL1<br>MYCN<br>MYEF2<br>MYEOV2<br>MYH11<br>MYH14<br>MYL9<br>MYLIP<br>MYLK<br>MYNN<br>MYO10<br>MYO19<br>MYO1C |
|--|--|--|--|--|--|----------------------------------------------------------------------------------------------------------------------------------------------------------------------------------------------------------------------------------------------------------------------------------------------------------------------------------------------------------------------------|-----------------------------------------------------------------------------------------------------------------------------------------------------------------------------------------------------------------------------------------------------------------------------------------------------------------------------------------------------------------------------------------------------------------|-----------------------------------------------------------------------------------------------------------------------------------------------------------------------------------------------------------------------------------------------------------------------------------------------------------------------------------------------------|

|  |  |  |  |  |  |                                                                                                                                                                                                                                                                                                                                                                                          |                                                                                                                                                                                                                                                                                                                                                                     |                                                                                                                                                                                                                                                                                                                                                        |
|--|--|--|--|--|--|------------------------------------------------------------------------------------------------------------------------------------------------------------------------------------------------------------------------------------------------------------------------------------------------------------------------------------------------------------------------------------------|---------------------------------------------------------------------------------------------------------------------------------------------------------------------------------------------------------------------------------------------------------------------------------------------------------------------------------------------------------------------|--------------------------------------------------------------------------------------------------------------------------------------------------------------------------------------------------------------------------------------------------------------------------------------------------------------------------------------------------------|
|  |  |  |  |  |  | SCN4B<br>SCN8A<br>SCN9A<br>SCOC<br>SCRG1<br>SCRN2<br>SCRT1<br>SCUBE3<br>SDAD1<br>SDCCAG3<br>SDF4<br>SDK1<br>SEC11C<br>SEC22A<br>SEC22C<br>SEC24A<br>SEC61A2<br>SEC61B<br>SEC62<br>SECISBP2<br>SEH1L<br>SEMA3A<br>SEMA4D<br>SEMA5A<br>SEMA6A<br>SEMA6D<br>SENP1<br>SENP2<br>SENP7<br>SEPN1<br>SEPP1<br>SERINC2<br>SERP2<br>SERPINA1<br>SERPINB6<br>SERPINB9<br>SERPINE2<br>SESN2<br>SESN3 | PROK2<br>PROM2<br>PRPF38A<br>PRPF40A<br>PRPF8<br>PRPS2<br>PRR12<br>PRRC1<br>PRRX1<br>PRUNE<br>PSAT1<br>PSEN1<br>PSMA5<br>PSMB2<br>PSPC1<br>PSPH<br>PTBP1<br>PTEN<br>PTER<br>PTGER1<br>PTGFRN<br>PTGS1<br>PTK2<br>PTP4A1<br>PTPLAD1<br>PTPN1<br>PTPN13<br>PTPN14<br>PTPN2<br>PTPN21<br>PTPN23<br>PTPN3<br>PTPN4<br>PTPRB<br>PTPRE<br>PTPRJ<br>PTPRS<br>PUM2<br>PUS10 | MYO1G<br>MYO5A<br>MYO9A<br>MYPN<br>MYRIP<br>MYT1L<br>N4BP2<br>N4BP2L1<br>N4BP2L2<br>N6AMT2<br>NAAA<br>NAB1<br>NADSYN1<br>NAF1<br>NAGS<br>NAIF1<br>NAIP<br>NAMPT<br>NANOS1<br>NANP<br>NAP1L5<br>NAPEPLD<br>NAPG<br>NARF<br>NARS<br>NAT14<br>NAT8L<br>NAV1<br>NAV2<br>NBEA<br>NBN<br>NBPF3<br>NCAM1<br>NCDN<br>NCOA5<br>NCOA7<br>NCOR1<br>NCOR2<br>NCSTN |
|--|--|--|--|--|--|------------------------------------------------------------------------------------------------------------------------------------------------------------------------------------------------------------------------------------------------------------------------------------------------------------------------------------------------------------------------------------------|---------------------------------------------------------------------------------------------------------------------------------------------------------------------------------------------------------------------------------------------------------------------------------------------------------------------------------------------------------------------|--------------------------------------------------------------------------------------------------------------------------------------------------------------------------------------------------------------------------------------------------------------------------------------------------------------------------------------------------------|

|  |  |  |  |  |  |                                                                                                                                                                                                                                                                                                                                                                                   |                                                                                                                                                                                                                                                                                                                                                                             |                                                                                                                                                                                                                                                                                                                                                                         |
|--|--|--|--|--|--|-----------------------------------------------------------------------------------------------------------------------------------------------------------------------------------------------------------------------------------------------------------------------------------------------------------------------------------------------------------------------------------|-----------------------------------------------------------------------------------------------------------------------------------------------------------------------------------------------------------------------------------------------------------------------------------------------------------------------------------------------------------------------------|-------------------------------------------------------------------------------------------------------------------------------------------------------------------------------------------------------------------------------------------------------------------------------------------------------------------------------------------------------------------------|
|  |  |  |  |  |  | SETBP1<br>SETD4<br>SETD5<br>SETD7<br>SETD8<br>SETX<br>SEZ6L<br>SEZ6L2<br>SF3A1<br>SFMBT2<br>SFPQ<br>SFRP1<br>SFRP2<br>SFT2D1<br>SFXN1<br>SFXN4<br>SFXN5<br>SGCB<br>SGIP1<br>SGK2<br>SGOL1<br>SGPP2<br>SGSM1<br>SGTB<br>SH2D5<br>SH3BGRL2<br>SH3GLB2<br>SH3KBP1<br>SH3PXD2A<br>SH3PXD2B<br>SHANK2<br>SHC4<br>SHISA2<br>SHISA5<br>SHROOM3<br>SIN3A<br>SIPA1L1<br>SIPA1L2<br>SIPA1L3 | PUS7L<br>PVRL1<br>PVRL2<br>PVRL4<br>PWWP2A<br>PXK<br>PYDC1<br>PYGB<br>PYGO1<br>PYGO2<br>PYROXD1<br>QDPR<br>QKI<br>QSOX1<br>QSOX2<br>RAB10<br>RAB11FIP1<br>RAB11FIP3<br>RAB11FIP4<br>RAB12<br>RAB18<br>RAB21<br>RAB23<br>RAB24<br>RAB27A<br>RAB28<br>RAB2B<br>RAB32<br>RAB37<br>RAB39B<br>RAB3B<br>RAB3C<br>RAB3D<br>RAB3GAP1<br>RAB3IP<br>RAB5A<br>RAB6B<br>RAB9B<br>RABEP1 | NDFIP1<br>NDFIP2<br>NDNL2<br>NDUFA10<br>NDUFA11<br>NDUFA2<br>NDUFAF2<br>NDUFB4<br>NDUFB9<br>NDUFS1<br>NDUFV3<br>NEBL<br>NECAB1<br>NECAP2<br>NEDD1<br>NEDD4L<br>NEDD9<br>NEFM<br>NEGR1<br>NEIL2<br>NEK10<br>NEK9<br>NEO1<br>NETO2<br>NEU3<br>NEU4<br>NEXN<br>NF2<br>NFASC<br>NFAT5<br>NFATC2<br>NFATC2IP<br>NFATC3<br>NFE2L3<br>NFIB<br>NFIC<br>NFIK<br>NFKBIA<br>NFKBIB |
|--|--|--|--|--|--|-----------------------------------------------------------------------------------------------------------------------------------------------------------------------------------------------------------------------------------------------------------------------------------------------------------------------------------------------------------------------------------|-----------------------------------------------------------------------------------------------------------------------------------------------------------------------------------------------------------------------------------------------------------------------------------------------------------------------------------------------------------------------------|-------------------------------------------------------------------------------------------------------------------------------------------------------------------------------------------------------------------------------------------------------------------------------------------------------------------------------------------------------------------------|

|  |  |  |  |  |  |                                                                                                                                                                                                                                                                                                                                                                                                                                              |                                                                                                                                                                                                                                                                                                                                                                                         |                                                                                                                                                                                                                                                                                                                                                               |
|--|--|--|--|--|--|----------------------------------------------------------------------------------------------------------------------------------------------------------------------------------------------------------------------------------------------------------------------------------------------------------------------------------------------------------------------------------------------------------------------------------------------|-----------------------------------------------------------------------------------------------------------------------------------------------------------------------------------------------------------------------------------------------------------------------------------------------------------------------------------------------------------------------------------------|---------------------------------------------------------------------------------------------------------------------------------------------------------------------------------------------------------------------------------------------------------------------------------------------------------------------------------------------------------------|
|  |  |  |  |  |  | SIRT6<br>SKI<br>SLAIN1<br>SLAIN2<br>SLAMF7<br>SLC10A7<br>SLC11A1<br>SLC11A2<br>SLC12A3<br>SLC14A1<br>SLC15A4<br>SLC16A10<br>SLC16A6<br>SLC16A7<br>SLC16A9<br>SLC17A5<br>SLC1A2<br>SLC1A4<br>SLC20A1<br>SLC22A15<br>SLC22A23<br>SLC22A5<br>SLC23A3<br>SLC25A2<br>SLC25A23<br>SLC25A26<br>SLC25A28<br>SLC25A29<br>SLC25A33<br>SLC25A37<br>SLC25A39<br>SLC25A40<br>SLC25A45<br>SLC25A46<br>SLC26A11<br>SLC26A9<br>SLC27A1<br>SLC2A12<br>SLC2A13 | RABGAP1L<br>RABL3<br>RAD23B<br>RAD50<br>RAD52<br>RADIL<br>RAI1<br>RALA<br>RALBP1<br>RALGPS1<br>RALGPS2<br>RANBP2<br>RANBP9<br>RANGRF<br>RAP1GDS1<br>RAP2A<br>RAP2B<br>RAPGEF6<br>RAPH1<br>RARS2<br>RASA2<br>RASAL1<br>RASAL2<br>RASD1<br>RASEF<br>RASGEF1A<br>RASIP1<br>RASL11B<br>RASSF4<br>RASSF5<br>RASSF8<br>RASSF9<br>RAVER2<br>RBAK<br>RBBP6<br>RBBP9<br>RBM11<br>RBM12B<br>RBM14 | NFKBIZ<br>NFRKB<br>NFYB<br>NFYC<br>NGEF<br>NHLRC2<br>NHLRC3<br>NHP2L1<br>NIN<br>NIPA1<br>NIPSNAP3A<br>NIPSNAP3B<br>NISCH<br>NKAPL<br>NKD1<br>NKIRAS1<br>NKTR<br>NLGN1<br>NLGN2<br>NLK<br>NLRC3<br>NLRP2<br>NLRP7<br>NMD3<br>NME7<br>NMNAT1<br>NMNAT3<br>NMRAL1<br>NMUR2<br>NNMT<br>NOB1<br>NOD1<br>NOL10<br>NOL4<br>NOL6<br>NOM1<br>NOS1<br>NOSTRIN<br>NOTCH4 |
|--|--|--|--|--|--|----------------------------------------------------------------------------------------------------------------------------------------------------------------------------------------------------------------------------------------------------------------------------------------------------------------------------------------------------------------------------------------------------------------------------------------------|-----------------------------------------------------------------------------------------------------------------------------------------------------------------------------------------------------------------------------------------------------------------------------------------------------------------------------------------------------------------------------------------|---------------------------------------------------------------------------------------------------------------------------------------------------------------------------------------------------------------------------------------------------------------------------------------------------------------------------------------------------------------|

|  |  |  |  |  |  |          |        |        |
|--|--|--|--|--|--|----------|--------|--------|
|  |  |  |  |  |  | SLC2A4RG | RBM18  | NOVA1  |
|  |  |  |  |  |  | SLC2A8   | RBM25  | NOX4   |
|  |  |  |  |  |  | SLC30A2  | RBM27  | NOXO1  |
|  |  |  |  |  |  | SLC30A8  | RBM5   | NPAS3  |
|  |  |  |  |  |  | SLC30A9  | RBMS1  | NPC1L1 |
|  |  |  |  |  |  | SLC31A1  | RBMS2  | NPEPL1 |
|  |  |  |  |  |  | SLC33A1  | RBMS3  | NPFFR2 |
|  |  |  |  |  |  | SLC35B4  | RBP7   | NPHP1  |
|  |  |  |  |  |  | SLC35E1  | RBPJ   | NPHP3  |
|  |  |  |  |  |  | SLC35F1  | RBPMS  | NPM1   |
|  |  |  |  |  |  | SLC35F3  | RC3H1  | NPM2   |
|  |  |  |  |  |  | SLC36A4  | RC3H2  | NPNT   |
|  |  |  |  |  |  | SLC37A3  | RCAN3  | NQO2   |
|  |  |  |  |  |  | SLC38A10 | RCBTB1 | NR1D2  |
|  |  |  |  |  |  | SLC38A11 | RCC2   | NR1H4  |
|  |  |  |  |  |  | SLC38A5  | RCL1   | NR2F2  |
|  |  |  |  |  |  | SLC38A7  | RCOR1  | NR3C1  |
|  |  |  |  |  |  | SLC39A10 | RCOR3  | NRAP   |
|  |  |  |  |  |  | SLC39A13 | RDH10  | NRD1   |
|  |  |  |  |  |  | SLC39A3  | RDH11  | NRG2   |
|  |  |  |  |  |  | SLC41A1  | REG3A  | NRG4   |
|  |  |  |  |  |  | SLC43A2  | REG3G  | NRIP3  |
|  |  |  |  |  |  | SLC44A5  | REG4   | NRM    |
|  |  |  |  |  |  | SLC45A3  | REL    | NRP2   |
|  |  |  |  |  |  | SLC4A8   | RELL1  | NRSN1  |
|  |  |  |  |  |  | SLC5A1   | RELT   | NRXN1  |
|  |  |  |  |  |  | SLC6A13  | REPIN1 | NRXN3  |
|  |  |  |  |  |  | SLC6A17  | REPS1  | NSD1   |
|  |  |  |  |  |  | SLC6A19  | REPS2  | NSFL1C |
|  |  |  |  |  |  | SLC6A20  | RERG   | NSMAF  |
|  |  |  |  |  |  | SLC6A4   | REV1   | NSUN4  |
|  |  |  |  |  |  | SLC6A6   | REXO2  | NSUN7  |
|  |  |  |  |  |  | SLC7A14  | RFFL   | NT5C1A |
|  |  |  |  |  |  | SLC7A2   | RFT1   | NT5DC1 |
|  |  |  |  |  |  | SLC8A1   | RFTN2  | NT5DC3 |
|  |  |  |  |  |  | SLC9A1   | RFX1   | NT5E   |
|  |  |  |  |  |  | SLC9A9   | RFX2   | NTN1   |
|  |  |  |  |  |  | SLCO3A1  | RFX4   | NTN4   |
|  |  |  |  |  |  | SLCO5A1  | RFXAP  | NTRK2  |

|  |  |  |  |  |  |                                                                                                                                                                                                                                                                                                                                                                     |                                                                                                                                                                                                                                                                                                                                                       |                                                                                                                                                                                                                                                                                                                                                      |
|--|--|--|--|--|--|---------------------------------------------------------------------------------------------------------------------------------------------------------------------------------------------------------------------------------------------------------------------------------------------------------------------------------------------------------------------|-------------------------------------------------------------------------------------------------------------------------------------------------------------------------------------------------------------------------------------------------------------------------------------------------------------------------------------------------------|------------------------------------------------------------------------------------------------------------------------------------------------------------------------------------------------------------------------------------------------------------------------------------------------------------------------------------------------------|
|  |  |  |  |  |  | SLITRK2<br>SLITRK6<br>SLU7<br>SMAD1<br>SMAD9<br>SMAP2<br>SMARCA2<br>SMARCB1<br>SMARCD3<br>SMARCE1<br>SMC5<br>SMCHD1<br>SMEK1<br>SMNDC1<br>SMOC2<br>SMPD3<br>SMU1<br>SMUG1<br>SMYD4<br>SNAP29<br>SNAPC3<br>SNCA<br>SNRPA1<br>SNRPN<br>SNTB1<br>SNX12<br>SNX16<br>SNX2<br>SNX21<br>SNX22<br>SNX29<br>SNX3<br>SNX32<br>SNX33<br>SNX5<br>SNX9<br>SOAT1<br>SOBP<br>SOCS2 | RGL3<br>RGMA<br>RGMB<br>RGS12<br>RGS16<br>RGS22<br>RGS5<br>RGS7BP<br>RHBDD2<br>RHBDF1<br>RHEB<br>RHOA<br>RHOB<br>RHOF<br>RHOT1<br>RHOV<br>RHPN1<br>RHPN2<br>RIBC1<br>RICTOR<br>RILP<br>RIMBP2<br>RIMS2<br>RIMS4<br>RIOK1<br>RIOK2<br>RIPK3<br>RIPK4<br>RIT1<br>RNASEL<br>RNASET2<br>RNF126<br>RNF130<br>RNF135<br>RNF14<br>RNF141<br>RNF145<br>RNF146 | NTRK3<br>NUCB2<br>NUCKS1<br>NUDT10<br>NUDT16<br>NUDT21<br>NUDT4<br>NUDT6<br>NUDT7<br>NUF2<br>NUFIP2<br>NUMA1<br>NUMBL<br>NUP153<br>NUP37<br>NUP43<br>NUP50<br>NUP62<br>NUP93<br>NUPL1<br>NUS1<br>OAF<br>OAS2<br>OAS3<br>OAZ1<br>OBFC1<br>OBP2A<br>OBSCN<br>OBSL1<br>OCIAD2<br>OCLN<br>ODF2<br>ODF2L<br>OGFRL1<br>OGN<br>OGT<br>OLA1<br>OLFM2<br>OMA1 |
|--|--|--|--|--|--|---------------------------------------------------------------------------------------------------------------------------------------------------------------------------------------------------------------------------------------------------------------------------------------------------------------------------------------------------------------------|-------------------------------------------------------------------------------------------------------------------------------------------------------------------------------------------------------------------------------------------------------------------------------------------------------------------------------------------------------|------------------------------------------------------------------------------------------------------------------------------------------------------------------------------------------------------------------------------------------------------------------------------------------------------------------------------------------------------|

|  |  |  |  |  |  |         |         |         |
|--|--|--|--|--|--|---------|---------|---------|
|  |  |  |  |  |  | SOCS4   | RNF149  | ONECUT2 |
|  |  |  |  |  |  | SOCS6   | RNF150  | OPA3    |
|  |  |  |  |  |  | SOCS7   | RNF166  | OPN3    |
|  |  |  |  |  |  | SON     | RNF185  | OR51E1  |
|  |  |  |  |  |  | SORBS1  | RNF19A  | OR51E2  |
|  |  |  |  |  |  | SORCS1  | RNF212  | ORAI1   |
|  |  |  |  |  |  | SORD    | RNF213  | ORAI2   |
|  |  |  |  |  |  | SORL1   | RNF214  | ORAOV1  |
|  |  |  |  |  |  | SORT1   | RNF219  | ORMDL1  |
|  |  |  |  |  |  | SOS1    | RNF38   | ORMDL3  |
|  |  |  |  |  |  | SOS2    | RNPS1   | OSBPL10 |
|  |  |  |  |  |  | SOST    | ROBO2   | OSBPL11 |
|  |  |  |  |  |  | SOX17   | ROCK1   | OSBPL6  |
|  |  |  |  |  |  | SOX5    | ROR1    | OSBPL7  |
|  |  |  |  |  |  | SOX6    | RORB    | OSBPL8  |
|  |  |  |  |  |  | SOX7    | RP9     | OSGEPL1 |
|  |  |  |  |  |  | SOX8    | RP9P    | OSMR    |
|  |  |  |  |  |  | SP100   | RPA1    | OSTM1   |
|  |  |  |  |  |  | SP110   | RPAIN   | OTOP2   |
|  |  |  |  |  |  | SP2     | RPE     | OTUB2   |
|  |  |  |  |  |  | SP3     | RPH3AL  | OTUD1   |
|  |  |  |  |  |  | SP5     | RPL10A  | OTUD4   |
|  |  |  |  |  |  | SPAG16  | RPL18   | OTUD6B  |
|  |  |  |  |  |  | SPAG9   | RPL24   | OTUD7B  |
|  |  |  |  |  |  | SPATA17 | RPL32P3 | OVOL1   |
|  |  |  |  |  |  | SPATA18 | RPL34   | OXCT2   |
|  |  |  |  |  |  | SPATA5  | RPL35A  | OXR1    |
|  |  |  |  |  |  | SPATA7  | RPL37   | P2RX7   |
|  |  |  |  |  |  | SPCS2   | RPL7    | P2RY8   |
|  |  |  |  |  |  | SPG20   | RPL9    | P4HA1   |
|  |  |  |  |  |  | SPIN1   | RPP25   | P4HA3   |
|  |  |  |  |  |  | SPIN4   | RPS10   | PABPC1L |
|  |  |  |  |  |  | SPIRE1  | RPS14   | PACS1   |
|  |  |  |  |  |  | SPIRE2  | RPS23   | PACSIN1 |
|  |  |  |  |  |  | SPNS1   | RPS24   | PACSIN2 |
|  |  |  |  |  |  | SPNS2   | RPS25   | PAG1    |
|  |  |  |  |  |  | SPNS3   | RPS29   | PAIP2   |
|  |  |  |  |  |  | SPON1   | RPS5    | PAK1    |
|  |  |  |  |  |  | SPOPL   | RPS6KA3 | PAK3    |



|  |  |  |  |  |  |                                                                                                                                                                                                                                                                                                                                                                                    |                                                                                                                                                                                                                                                                                                                                                                           |                                                                                                                                                                                                                                                                                                                                                                            |
|--|--|--|--|--|--|------------------------------------------------------------------------------------------------------------------------------------------------------------------------------------------------------------------------------------------------------------------------------------------------------------------------------------------------------------------------------------|---------------------------------------------------------------------------------------------------------------------------------------------------------------------------------------------------------------------------------------------------------------------------------------------------------------------------------------------------------------------------|----------------------------------------------------------------------------------------------------------------------------------------------------------------------------------------------------------------------------------------------------------------------------------------------------------------------------------------------------------------------------|
|  |  |  |  |  |  | SPRY1<br>SPRYD3<br>SPSB1<br>SPTBN4<br>SPTLC2<br>SPTLC3<br>SRA1<br>SRD5A2<br>SREBF2<br>SRP68<br>SRPK2<br>SRRD<br>SSBP2<br>SSFA2<br>SSPN<br>SSR1<br>SSR3<br>SSTR1<br>SSTR2<br>SSU72<br>ST3GAL2<br>ST3GAL3<br>ST6GALNAC<br>3<br>ST6GALNAC<br>5<br>ST6GALNAC<br>6<br>ST8SIA2<br>ST8SIA3<br>ST8SIA4<br>STAC2<br>STAMPB<br>STAMBPL1<br>STARD13<br>STARD3NL<br>STARD4<br>STARD7<br>STARD9 | RPS6KA6<br>RPS6KB1<br>RPUSD1<br>RPUSD4<br>RRAD<br>RRBP1<br>RRM2B<br>RRP1<br>RSAD2<br>RSBN1<br>RSPH1<br>RSPH3<br>RSPO1<br>RSPO3<br>RSPRY1<br>RSRC1<br>RSU1<br>RTBDN<br>RTKN2<br>RTN3<br>RTN4RL1<br>RTTN<br>RUFY1<br>RUFY2<br>RUFY3<br>RUND1<br>RUNX1T1<br>S100A10<br>S100A16<br>S100A6<br>S100PBP<br>S1PR2<br>S1PR5<br>SAE1<br>SALL1<br>SAMD12<br>SAMD13<br>SAMD3<br>SAMD5 | PALMD<br>PANX1<br>PAPD4<br>PAPD5<br>PAPLN<br>PAPOLA<br>PAPOLG<br>PAPP<br>PAPP2<br>PAQR5<br>PAQR8<br>PARD3B<br>PARP14<br>PARP8<br>PARP9<br>PARS2<br>PARVA<br>PARVB<br>PARVG<br>PATL1<br>PAWR<br>PAX6<br>PBRM1<br>PBX4<br>PCBP2<br>PCCA<br>PCDH10<br>PCDH17<br>PCDH7<br>PCDH9<br>PCDHAC2<br>PCDHB13<br>PCDHB14<br>PCDHB15<br>PCDHB16<br>PCDHB2<br>PCDHB4<br>PCDHB5<br>PCDHB6 |
|--|--|--|--|--|--|------------------------------------------------------------------------------------------------------------------------------------------------------------------------------------------------------------------------------------------------------------------------------------------------------------------------------------------------------------------------------------|---------------------------------------------------------------------------------------------------------------------------------------------------------------------------------------------------------------------------------------------------------------------------------------------------------------------------------------------------------------------------|----------------------------------------------------------------------------------------------------------------------------------------------------------------------------------------------------------------------------------------------------------------------------------------------------------------------------------------------------------------------------|

|  |  |  |  |  |  |                                                                                                                                                                                                                                                                                                                                                                          |                                                                                                                                                                                                                                                                                                                                                                            |                                                                                                                                                                                                                                                                                                                                                                    |
|--|--|--|--|--|--|--------------------------------------------------------------------------------------------------------------------------------------------------------------------------------------------------------------------------------------------------------------------------------------------------------------------------------------------------------------------------|----------------------------------------------------------------------------------------------------------------------------------------------------------------------------------------------------------------------------------------------------------------------------------------------------------------------------------------------------------------------------|--------------------------------------------------------------------------------------------------------------------------------------------------------------------------------------------------------------------------------------------------------------------------------------------------------------------------------------------------------------------|
|  |  |  |  |  |  | STAT3<br>STAU2<br>STEAP2<br>STEAP4<br>STK11<br>STK11IP<br>STK19<br>STK31<br>STK33<br>STK35<br>STK40<br>STMN3<br>STON1<br>STT3B<br>STUB1<br>STX3<br>STX4<br>STXBP5<br>STXBP5L<br>STXBP6<br>STYXL1<br>SUCLG1<br>SUFU<br>SULF2<br>SUPT16H<br>SURF4<br>SUSD1<br>SUSD4<br>SUV420H2<br>SV2B<br>SVEP1<br>SVIP<br>SVOP<br>SYCE1<br>SYCP2<br>SYNCRIP<br>SYNE1<br>SYNE2<br>SYNGAP1 | SAMHD1<br>SAMM50<br>SAP30BP<br>SAR1B<br>SARM1<br>SART3<br>SASH1<br>SAV1<br>SCAF1<br>SCAMP2<br>SCAMP5<br>SCAND1<br>SCARB1<br>SCARF2<br>SCD5<br>SCFD1<br>SCFD2<br>SCGB3A2<br>SCN11A<br>SCN2B<br>SCN4B<br>SCN7A<br>SCN8A<br>SCNN1G<br>SCO1<br>SCOC<br>SCRG1<br>SCRN2<br>SCRN3<br>SCYL2<br>SCYL3<br>SDAD1<br>SDHC<br>SDK1<br>SEC11C<br>SEC14L1<br>SEC14L2<br>SEC14L4<br>SEC16B | PCDHB7<br>PCDHB9<br>PCDHGC5<br>PCF11<br>PCGF3<br>PCGF5<br>PCM1<br>PCMTD1<br>PCMTD2<br>PCNP<br>PCNT<br>PCNX<br>PCNXL2<br>PCSK6<br>PCSK9<br>PCYOX1<br>PCYT1B<br>PDCD2<br>PDCD2L<br>PDCD5<br>PDCD6IP<br>PDCD7<br>PDDC1<br>PDE1A<br>PDE1C<br>PDE3A<br>PDE4A<br>PDE4D<br>PDE5A<br>PDE7A<br>PDE8A<br>PDE8B<br>PDE9A<br>PDGFC<br>PDGFD<br>PDIA3<br>PDIK1L<br>PDK1<br>PDK3 |
|--|--|--|--|--|--|--------------------------------------------------------------------------------------------------------------------------------------------------------------------------------------------------------------------------------------------------------------------------------------------------------------------------------------------------------------------------|----------------------------------------------------------------------------------------------------------------------------------------------------------------------------------------------------------------------------------------------------------------------------------------------------------------------------------------------------------------------------|--------------------------------------------------------------------------------------------------------------------------------------------------------------------------------------------------------------------------------------------------------------------------------------------------------------------------------------------------------------------|

|  |  |  |  |  |  |          |          |         |
|--|--|--|--|--|--|----------|----------|---------|
|  |  |  |  |  |  | SYNGR2   | SEC22C   | PDK4    |
|  |  |  |  |  |  | SYNJ1    | SEC24A   | PDLIM3  |
|  |  |  |  |  |  | SYNJ2    | SEC61B   | PDLIM5  |
|  |  |  |  |  |  | SYNPO2   | SEC62    | PDPN    |
|  |  |  |  |  |  | SYNPR    | SEC63    | PDPR    |
|  |  |  |  |  |  | SYS1     | SEH1L    | PDS5B   |
|  |  |  |  |  |  | SYT11    | SEMA3A   | PDXDC1  |
|  |  |  |  |  |  | SYT12    | SEMA4F   | PDXK    |
|  |  |  |  |  |  | SYT13    | SEMA5A   | PDZD2   |
|  |  |  |  |  |  | SYT16    | SEMA6A   | PDZD4   |
|  |  |  |  |  |  | SYT17    | SEMA6D   | PDZD8   |
|  |  |  |  |  |  | SYT4     | SENP1    | PEBP4   |
|  |  |  |  |  |  | SYT7     | SENP7    | PECR    |
|  |  |  |  |  |  | TACC1    | SENP8    | PELI3   |
|  |  |  |  |  |  | TAF13    | SEPN1    | PENK    |
|  |  |  |  |  |  | TAF15    | SEPSECS  | PERP    |
|  |  |  |  |  |  | TAF4B    | SERINC2  | PEX13   |
|  |  |  |  |  |  | TAF9B    | SERP2    | PEX26   |
|  |  |  |  |  |  | TAGLN    | SERPINA1 | PEX5L   |
|  |  |  |  |  |  | TANC2    | SERPINB1 | PFKFB1  |
|  |  |  |  |  |  | TAP2     | SERPINB9 | PFKFB2  |
|  |  |  |  |  |  | TAPT1    | SERPINE2 | PFKP    |
|  |  |  |  |  |  | TARDBP   | SERTAD1  | PGAP1   |
|  |  |  |  |  |  | TAS2R5   | SERTAD4  | PGBD1   |
|  |  |  |  |  |  | TASP1    | SES2     | PGBD4   |
|  |  |  |  |  |  | TATDN1   | SETD4    | PGK1    |
|  |  |  |  |  |  | TBC1D1   | SETD5    | PGLS    |
|  |  |  |  |  |  | TBC1D22B | SETD7    | PGM2L1  |
|  |  |  |  |  |  | TBC1D24  | SETD8    | PGM5    |
|  |  |  |  |  |  | TBC1D25  | SETDB2   | PGPEP1  |
|  |  |  |  |  |  | TBC1D2B  | SETX     | PGR     |
|  |  |  |  |  |  | TBC1D7   | SEZ6L    | PHACTR1 |
|  |  |  |  |  |  | TBC1D8B  | SEZ6L2   | PHACTR2 |
|  |  |  |  |  |  | TBCD     | SF3A1    | PHACTR4 |
|  |  |  |  |  |  | TBL1XR1  | SFMBT2   | PHC2    |
|  |  |  |  |  |  | TBRG1    | SFPQ     | PHC3    |
|  |  |  |  |  |  | TBX15    | SFRP2    | PHF10   |
|  |  |  |  |  |  | TBX3     | SFXN5    | PHF11   |
|  |  |  |  |  |  | TC2N     | SGCD     | PHF13   |

|  |  |  |  |  |  |                                                                                                                                                                                                                                                                                                                                                             |                                                                                                                                                                                                                                                                                                                                                                                       |                                                                                                                                                                                                                                                                                                                                                                     |
|--|--|--|--|--|--|-------------------------------------------------------------------------------------------------------------------------------------------------------------------------------------------------------------------------------------------------------------------------------------------------------------------------------------------------------------|---------------------------------------------------------------------------------------------------------------------------------------------------------------------------------------------------------------------------------------------------------------------------------------------------------------------------------------------------------------------------------------|---------------------------------------------------------------------------------------------------------------------------------------------------------------------------------------------------------------------------------------------------------------------------------------------------------------------------------------------------------------------|
|  |  |  |  |  |  | TCEA2<br>TCEAL7<br>TCEAL8<br>TCERG1L<br>TCF4<br>TCFL5<br>TCOF1<br>TCP10L<br>TCTEX1D2<br>TCTN2<br>TDRD9<br>TEAD1<br>TEAD2<br>TEF<br>TEP1<br>TES<br>TESC<br>TET1<br>TET2<br>TEX11<br>TEX264<br>TFB1M<br>TFDP1<br>TFG<br>TGDS<br>TGFBRAP1<br>TGIF1<br>THAP2<br>THAP6<br>THBD<br>THNSL1<br>THOC2<br>THRAP3<br>THSD4<br>THSD7A<br>TIFA<br>TIGD7<br>TIMP2<br>TJP2 | SGIP1<br>SGK2<br>SGOL1<br>SGOL2<br>SGPP2<br>SGSM1<br>SGTB<br>SH2D5<br>SH3BP4<br>SH3KBP1<br>SH3PXD2A<br>SH3PXD2B<br>SH3RF1<br>SHANK2<br>SHF<br>SHMT1<br>SHPRH<br>SIAE<br>SIN3A<br>SIPA1L1<br>SIPA1L3<br>SIRPG<br>SIRT5<br>SIX3<br>SIX4<br>SKAP2<br>SKI<br>SKIL<br>SLAIN1<br>SLAIN2<br>SLC10A4<br>SLC10A7<br>SLC12A2<br>SLC12A4<br>SLC12A6<br>SLC12A9<br>SLC13A2<br>SLC14A1<br>SLC16A10 | PHF14<br>PHF20<br>PHF20L1<br>PHF21A<br>PHF5A<br>PHF6<br>PHF8<br>PHKA1<br>PHLDA1<br>PHLDA2<br>PHLDB2<br>PHLDB3<br>PHPT1<br>PHTF1<br>PHYHD1<br>PHYHIPL<br>PID1<br>PIF1<br>PIGG<br>PIGK<br>PIGL<br>PIGN<br>PIGR<br>PIGS<br>PIK3AP1<br>PINX1<br>PITPNC1<br>PITPNM2<br>PITRM1<br>PIWIL4<br>PKD1L2<br>PKHD1<br>PKIA<br>PKIB<br>PKP4<br>PLA2G12A<br>PLAA<br>PLCD4<br>PLCG2 |
|--|--|--|--|--|--|-------------------------------------------------------------------------------------------------------------------------------------------------------------------------------------------------------------------------------------------------------------------------------------------------------------------------------------------------------------|---------------------------------------------------------------------------------------------------------------------------------------------------------------------------------------------------------------------------------------------------------------------------------------------------------------------------------------------------------------------------------------|---------------------------------------------------------------------------------------------------------------------------------------------------------------------------------------------------------------------------------------------------------------------------------------------------------------------------------------------------------------------|

|  |  |  |  |  |  |          |          |         |
|--|--|--|--|--|--|----------|----------|---------|
|  |  |  |  |  |  | TK2      | SLC16A6  | PLCXD1  |
|  |  |  |  |  |  | TKT      | SLC16A7  | PLCXD3  |
|  |  |  |  |  |  | TLE3     | SLC16A9  | PLD1    |
|  |  |  |  |  |  | TLN2     | SLC17A5  | PLD4    |
|  |  |  |  |  |  | TLR3     | SLC1A2   | PLEKHA1 |
|  |  |  |  |  |  | TM4SF18  | SLC1A4   | PLEKHA3 |
|  |  |  |  |  |  | TM7SF3   | SLC20A1  | PLEKHA5 |
|  |  |  |  |  |  | TMBIM4   | SLC22A15 | PLEKHA6 |
|  |  |  |  |  |  | TMC5     | SLC22A23 | PLEKHA7 |
|  |  |  |  |  |  | TMC8     | SLC23A3  | PLEKHB1 |
|  |  |  |  |  |  | TMCC1    | SLC25A15 | PLEKHB2 |
|  |  |  |  |  |  | TMCC3    | SLC25A2  | PLEKHF2 |
|  |  |  |  |  |  | TMCO3    | SLC25A25 | PLEKHG1 |
|  |  |  |  |  |  | TMCO4    | SLC25A27 | PLEKHG2 |
|  |  |  |  |  |  | TMED2    | SLC25A28 | PLEKHG4 |
|  |  |  |  |  |  | TMED4    | SLC25A29 | PLEKHH1 |
|  |  |  |  |  |  | TMED5    | SLC25A35 | PLEKHH2 |
|  |  |  |  |  |  | TMED8    | SLC25A36 | PLEKHH3 |
|  |  |  |  |  |  | TMEM101  | SLC25A37 | PLSCR1  |
|  |  |  |  |  |  | TMEM102  | SLC25A40 | PLSCR2  |
|  |  |  |  |  |  | TMEM106B | SLC25A42 | PLXDC2  |
|  |  |  |  |  |  | TMEM106C | SLC25A46 | PLXNA2  |
|  |  |  |  |  |  | TMEM107  | SLC26A11 | PLXNA4  |
|  |  |  |  |  |  | TMEM108  | SLC26A8  | PLXNC1  |
|  |  |  |  |  |  | TMEM121  | SLC28A3  | PM20D1  |
|  |  |  |  |  |  | TMEM130  | SLC2A11  | PMCHL1  |
|  |  |  |  |  |  | TMEM131  | SLC2A12  | PMEP A1 |
|  |  |  |  |  |  | TMEM132A | SLC2A13  | PML     |
|  |  |  |  |  |  | TMEM132B | SLC2A4RG | PNMA3   |
|  |  |  |  |  |  | TMEM132D | SLC2A5   | PNPLA5  |
|  |  |  |  |  |  | TMEM138  | SLC2A8   | PNPLA7  |
|  |  |  |  |  |  | TMEM139  | SLC30A2  | PNPLA8  |
|  |  |  |  |  |  | TMEM143  | SLC30A4  | PNPT1   |
|  |  |  |  |  |  | TMEM154  | SLC30A5  | PODN    |
|  |  |  |  |  |  | TMEM163  | SLC30A8  | POGK    |
|  |  |  |  |  |  | TMEM171  | SLC30A9  | POLB    |
|  |  |  |  |  |  | TMEM176B | SLC33A1  | POLD3   |
|  |  |  |  |  |  | TMEM185A | SLC35A4  | POLE4   |
|  |  |  |  |  |  | TMEM196  | SLC35B4  | POLH    |

|  |  |  |  |  |  |           |          |          |
|--|--|--|--|--|--|-----------|----------|----------|
|  |  |  |  |  |  | TMEM200A  | SLC35C2  | POLI     |
|  |  |  |  |  |  | TMEM204   | SLC35E1  | POLR1D   |
|  |  |  |  |  |  | TMEM25    | SLC35F3  | POLR1E   |
|  |  |  |  |  |  | TMEM27    | SLC35F5  | POLR2J2  |
|  |  |  |  |  |  | TMEM30B   | SLC36A4  | POLR2J4  |
|  |  |  |  |  |  | TMEM33    | SLC37A1  | POLR3E   |
|  |  |  |  |  |  | TMEM38A   | SLC37A3  | POLR3G   |
|  |  |  |  |  |  | TMEM38B   | SLC38A10 | POLR3GL  |
|  |  |  |  |  |  | TMEM39A   | SLC38A11 | POMT2    |
|  |  |  |  |  |  | TMEM42    | SLC38A5  | POU2F1   |
|  |  |  |  |  |  | TMEM44    | SLC38A7  | POU2F2   |
|  |  |  |  |  |  | TMEM52    | SLC38A9  | PPAPDC1B |
|  |  |  |  |  |  | TMEM55A   | SLC39A13 | PPAPDC2  |
|  |  |  |  |  |  | TMEM55B   | SLC39A8  | PPAPDC3  |
|  |  |  |  |  |  | TMEM57    | SLC41A1  | PPARA    |
|  |  |  |  |  |  | TMEM59    | SLC41A3  | PPARD    |
|  |  |  |  |  |  | TMEM61    | SLC43A2  | PPHLN1   |
|  |  |  |  |  |  | TMEM64    | SLC44A1  | PPIA     |
|  |  |  |  |  |  | TMEM65    | SLC44A2  | PPIE     |
|  |  |  |  |  |  | TMEM68    | SLC44A5  | PPIL2    |
|  |  |  |  |  |  | TMEM69    | SLC45A3  | PPIL3    |
|  |  |  |  |  |  | TMEM9     | SLC46A1  | PPM1A    |
|  |  |  |  |  |  | TMEM92    | SLC47A2  | PPM1D    |
|  |  |  |  |  |  | TMEM98    | SLC4A8   | PPM1E    |
|  |  |  |  |  |  | TMEM9B    | SLC5A1   | PPM1H    |
|  |  |  |  |  |  | TMLHE     | SLC6A13  | PPM1K    |
|  |  |  |  |  |  | TMOD2     | SLC6A17  | PPM1L    |
|  |  |  |  |  |  | TMPRSS13  | SLC6A19  | PPME1    |
|  |  |  |  |  |  | TMPRSS3   | SLC6A20  | PPOX     |
|  |  |  |  |  |  | TMPRSS6   | SLC6A4   | PPP1CB   |
|  |  |  |  |  |  | TMTC1     | SLC6A6   | PPP1R12C |
|  |  |  |  |  |  | TNFAIP8   | SLC7A14  | PPP1R14A |
|  |  |  |  |  |  | TNFRSF10D | SLC7A2   | PPP1R14C |
|  |  |  |  |  |  | TNFRSF11A | SLC7A6OS | PPP1R16A |
|  |  |  |  |  |  | TNFRSF19  | SLC8A1   | PPP1R16B |
|  |  |  |  |  |  | TNFSF14   | SLC9A9   | PPP1R1A  |
|  |  |  |  |  |  | TNIK      | SLCO5A1  | PPP1R1B  |
|  |  |  |  |  |  | TNIP1     | SLFN11   | PPP1R1C  |
|  |  |  |  |  |  | TNKS1BP1  | SLFN5    | PPP1R2   |

|  |  |  |  |  |  |                                                                                                                                                                                                                                                                                                                                                                                 |                                                                                                                                                                                                                                                                                                                                                                    |                                                                                                                                                                                                                                                                                                                                                                                                    |
|--|--|--|--|--|--|---------------------------------------------------------------------------------------------------------------------------------------------------------------------------------------------------------------------------------------------------------------------------------------------------------------------------------------------------------------------------------|--------------------------------------------------------------------------------------------------------------------------------------------------------------------------------------------------------------------------------------------------------------------------------------------------------------------------------------------------------------------|----------------------------------------------------------------------------------------------------------------------------------------------------------------------------------------------------------------------------------------------------------------------------------------------------------------------------------------------------------------------------------------------------|
|  |  |  |  |  |  | TNPO1<br>TNRC18<br>TNRC6A<br>TNRC6B<br>TNRC6C<br>TNS3<br>TOLLIP<br>TOM1L1<br>TOM1L2<br>TOMM22<br>TOMM40L<br>TOP1MT<br>TOR3A<br>TOX2<br>TOX3<br>TP53INP1<br>TP53INP2<br>TP73<br>TPD52<br>TPK1<br>TPM1<br>TPM2<br>TPM3<br>TRA2A<br>TRAF1<br>TRAF3IP1<br>TRAK1<br>TRAM1L1<br>TRERF1<br>TRIB1<br>TRIM11<br>TRIM2<br>TRIM32<br>TRIM4<br>TRIM47<br>TRIM5<br>TRIM50<br>TRIM55<br>TRIM6 | SLITRK2<br>SLITRK6<br>SLMAP<br>SLU7<br>SMAD1<br>SMAD5<br>SMAD9<br>SMAP2<br>SMARCA2<br>SMARCB1<br>SMARCE1<br>SMC1A<br>SMCHD1<br>SMEK1<br>SMEK2<br>SMG7<br>SMNDC1<br>SMOC1<br>SMOC2<br>SMPD3<br>SMU1<br>SMYD4<br>SNCA<br>SNIP1<br>SNRPA1<br>SNRPN<br>SNTB1<br>SNX12<br>SNX13<br>SNX16<br>SNX18<br>SNX2<br>SNX21<br>SNX22<br>SNX25<br>SNX29<br>SNX3<br>SNX32<br>SNX33 | PPP1R3B<br>PPP1R3C<br>PPP1R3E<br>PPP1R3F<br>PPP1R9A<br>PPP1R9B<br>PPP2CA<br>PPP2R2A<br>PPP2R2D<br>PPP2R3C<br>PPP4R2<br>PPP6C<br>PPTC7<br>PQLC1<br>PRCP<br>PRDM1<br>PRDM11<br>PRDM16<br>PRELID1<br>PRELID2<br>PREPL<br>PREX1<br>PRICKLE1<br>PRICKLE2<br>PRKAA1<br>PRKAB2<br>PRKACB<br>PRKAG2<br>PRKAG3<br>PRKAR1A<br>PRKAR2A<br>PRKCE<br>PRKCH<br>PRKD2<br>PRKD3<br>PRKG1<br>PRKRA<br>PRLHR<br>PRLR |
|--|--|--|--|--|--|---------------------------------------------------------------------------------------------------------------------------------------------------------------------------------------------------------------------------------------------------------------------------------------------------------------------------------------------------------------------------------|--------------------------------------------------------------------------------------------------------------------------------------------------------------------------------------------------------------------------------------------------------------------------------------------------------------------------------------------------------------------|----------------------------------------------------------------------------------------------------------------------------------------------------------------------------------------------------------------------------------------------------------------------------------------------------------------------------------------------------------------------------------------------------|

|  |  |  |  |  |  |                                                                                                                                                                                                                                                                                                                                                                    |                                                                                                                                                                                                                                                                                                                                                        |                                                                                                                                                                                                                                                                                                                                                                     |
|--|--|--|--|--|--|--------------------------------------------------------------------------------------------------------------------------------------------------------------------------------------------------------------------------------------------------------------------------------------------------------------------------------------------------------------------|--------------------------------------------------------------------------------------------------------------------------------------------------------------------------------------------------------------------------------------------------------------------------------------------------------------------------------------------------------|---------------------------------------------------------------------------------------------------------------------------------------------------------------------------------------------------------------------------------------------------------------------------------------------------------------------------------------------------------------------|
|  |  |  |  |  |  | TRIM8<br>TRIM9<br>TRIOBP<br>TRIP12<br>TRMT5<br>TRPC4<br>TRPM3<br>TRPM6<br>TRPS1<br>TRUB1<br>TSC22D2<br>TSEN54<br>TSHZ1<br>TSHZ2<br>TSHZ3<br>TSPAN12<br>TSPAN2<br>TSPAN3<br>TSPAN33<br>TSPAN5<br>TSPYL6<br>TSR1<br>TTBK2<br>TTC17<br>TTC23<br>TTC26<br>TTC33<br>TTC5<br>TTC7A<br>TTC8<br>TTC9C<br>TTLL11<br>TTLL7<br>TTYH2<br>TUB<br>TUBB1<br>TUBE1<br>TUFM<br>TUG1 | SNX5<br>SNX9<br>SOAT1<br>SOBP<br>SOCS2<br>SOCS3<br>SOCS4<br>SON<br>SORBS1<br>SORBS2<br>SORL1<br>SORT1<br>SOS1<br>SOST<br>SOX17<br>SOX5<br>SOX6<br>SP1<br>SP100<br>SP3<br>SP4<br>SP5<br>SPAG16<br>SPAG7<br>SPAG9<br>SPATA12<br>SPATA13<br>SPATA18<br>SPATA19<br>SPATA6<br>SPATA7<br>SPCS2<br>SPCS3<br>SPDYA<br>SPG11<br>SPG20<br>SPG7<br>SPIN1<br>SPIN4 | PRMT2<br>PRMT6<br>PRNT<br>PRODH2<br>PROK2<br>PROM2<br>PROX1<br>PRPF38A<br>PRPF38B<br>PRPF40A<br>PRPF8<br>PRPS2<br>PRR12<br>PRR15<br>PRRC1<br>PRRX1<br>PRSS23<br>PRSS27<br>PRTFDC1<br>PRUNE<br>PSAT1<br>PSD2<br>PSEN1<br>PSMA5<br>PSMA8<br>PSMB2<br>PSMC2<br>PSMF1<br>PSPC1<br>PSPH<br>PTBP1<br>PTCD3<br>PTCHD1<br>PTEN<br>PTER<br>PTGER1<br>PTGFRN<br>PTGS1<br>PTK2 |
|--|--|--|--|--|--|--------------------------------------------------------------------------------------------------------------------------------------------------------------------------------------------------------------------------------------------------------------------------------------------------------------------------------------------------------------------|--------------------------------------------------------------------------------------------------------------------------------------------------------------------------------------------------------------------------------------------------------------------------------------------------------------------------------------------------------|---------------------------------------------------------------------------------------------------------------------------------------------------------------------------------------------------------------------------------------------------------------------------------------------------------------------------------------------------------------------|



|  |  |  |  |  |  |                                                                                                                                                                                                                                                                                                                                                                           |                                                                                                                                                                                                                                                                                                                                                                                    |                                                                                                                                                                                                                                                                                                                                                                  |
|--|--|--|--|--|--|---------------------------------------------------------------------------------------------------------------------------------------------------------------------------------------------------------------------------------------------------------------------------------------------------------------------------------------------------------------------------|------------------------------------------------------------------------------------------------------------------------------------------------------------------------------------------------------------------------------------------------------------------------------------------------------------------------------------------------------------------------------------|------------------------------------------------------------------------------------------------------------------------------------------------------------------------------------------------------------------------------------------------------------------------------------------------------------------------------------------------------------------|
|  |  |  |  |  |  | TULP4<br>TUSC1<br>TUSC3<br>TWISTNB<br>TWSG1<br>TXNDC11<br>TXNDC12<br>TXNL4B<br>U2AF1<br>UACA<br>UBA5<br>UBAC2<br>UBASH3B<br>UBE2B<br>UBE2D3<br>UBE2G1<br>UBE2J2<br>UBE2K<br>UBE2Q2<br>UBE2T<br>UBE2W<br>UBE2Z<br>UBE3C<br>UBFD1<br>UBQLN1<br>UBQLN2<br>UBR1<br>UBR3<br>UBTF<br>UCKL1<br>UEVLD<br>UGT1A6<br>UHMK1<br>UHRF2<br>ULK4<br>UNC119B<br>UNC13A<br>UNC45B<br>UNC5B | SPINT1<br>SPIRE1<br>SPIRE2<br>SPNS3<br>SPOCD1<br>SPON1<br>SPOP<br>SPOPL<br>SPRED1<br>SPRY1<br>SPRY3<br>SPSB1<br>SPTAN1<br>SPTBN1<br>SPTBN4<br>SPTLC2<br>SPTLC3<br>SRD5A3<br>SRGAP1<br>SRMS<br>SRPK2<br>SRPRB<br>SRXN1<br>SSBP2<br>SSFA2<br>SSR1<br>SSR3<br>SSTR1<br>SSTR2<br>ST3GAL1<br>ST3GAL2<br>ST6GAL2<br>ST6GALNAC<br>5<br>ST8SIA2<br>ST8SIA3<br>ST8SIA4<br>STAG1<br>STAMBPL1 | PTP4A1<br>PTPLAD1<br>PTPMT1<br>PTPN1<br>PTPN13<br>PTPN14<br>PTPN2<br>PTPN21<br>PTPN23<br>PTPN3<br>PTPN4<br>PTPRB<br>PTPRE<br>PTPRJ<br>PTPRK<br>PTPRS<br>PUM2<br>PURB<br>PUS10<br>PUS7L<br>PVR<br>PVRL1<br>PVRL2<br>PVRL4<br>PWWP2A<br>PXK<br>PYDC1<br>PYGB<br>PYGO1<br>PYGO2<br>PYROXD1<br>QDPR<br>QKI<br>QRSL1<br>QSER1<br>QSOX1<br>QSOX2<br>RAB10<br>RAB11FIP1 |
|--|--|--|--|--|--|---------------------------------------------------------------------------------------------------------------------------------------------------------------------------------------------------------------------------------------------------------------------------------------------------------------------------------------------------------------------------|------------------------------------------------------------------------------------------------------------------------------------------------------------------------------------------------------------------------------------------------------------------------------------------------------------------------------------------------------------------------------------|------------------------------------------------------------------------------------------------------------------------------------------------------------------------------------------------------------------------------------------------------------------------------------------------------------------------------------------------------------------|

|  |  |  |  |  |  |                                                                                                                                                                                                                                                                                                                                                        |                                                                                                                                                                                                                                                                                                                                                                        |                                                                                                                                                                                                                                                                                                                                                                                     |
|--|--|--|--|--|--|--------------------------------------------------------------------------------------------------------------------------------------------------------------------------------------------------------------------------------------------------------------------------------------------------------------------------------------------------------|------------------------------------------------------------------------------------------------------------------------------------------------------------------------------------------------------------------------------------------------------------------------------------------------------------------------------------------------------------------------|-------------------------------------------------------------------------------------------------------------------------------------------------------------------------------------------------------------------------------------------------------------------------------------------------------------------------------------------------------------------------------------|
|  |  |  |  |  |  | UNC5C<br>UNC5D<br>UPRT<br>URM1<br>USP16<br>USP2<br>USP22<br>USP3<br>USP30<br>USP32<br>USP34<br>USP35<br>USP37<br>USP38<br>USP40<br>USP47<br>USP48<br>USP7<br>USP9Y<br>UTP11L<br>UTP15<br>UTP6<br>UTRN<br>UXS1<br>VANGL1<br>VAPA<br>VASH1<br>VASN<br>VAV2<br>VAV3<br>VCPIP1<br>VGLL2<br>VIL1<br>VPS13A<br>VPS13B<br>VPS13C<br>VPS26B<br>VPS35<br>VPS37A | STARD3NL<br>STARD7<br>STARD9<br>STAT3<br>STAU2<br>STEAP2<br>STIM2<br>STK11IP<br>STK17B<br>STK35<br>STK4<br>STK40<br>STMN3<br>STON1<br>STON2<br>STRBP<br>STRN<br>STT3B<br>STX4<br>STX6<br>STXBP5L<br>STXBP6<br>SUCLG1<br>SULF2<br>SULT1C2<br>SUPT16H<br>SURF4<br>SURF6<br>SUSD1<br>SUSD4<br>SVEP1<br>SVIP<br>SVOP<br>SYCE1<br>SYCP3<br>SYK<br>SYNCRIP<br>SYNE1<br>SYNE2 | RAB11FIP3<br>RAB11FIP4<br>RAB12<br>RAB18<br>RAB1A<br>RAB21<br>RAB23<br>RAB24<br>RAB27A<br>RAB27B<br>RAB28<br>RAB2B<br>RAB30<br>RAB32<br>RAB37<br>RAB39B<br>RAB3B<br>RAB3C<br>RAB3D<br>RAB3GAP1<br>RAB3IP<br>RAB40B<br>RAB5A<br>RAB6B<br>RAB7A<br>RAB8B<br>RAB9B<br>RABEP1<br>RABGAP1L<br>RABL3<br>RAD23B<br>RAD50<br>RAD52<br>RADIL<br>RAI1<br>RALA<br>RALBP1<br>RALGPS1<br>RALGPS2 |
|--|--|--|--|--|--|--------------------------------------------------------------------------------------------------------------------------------------------------------------------------------------------------------------------------------------------------------------------------------------------------------------------------------------------------------|------------------------------------------------------------------------------------------------------------------------------------------------------------------------------------------------------------------------------------------------------------------------------------------------------------------------------------------------------------------------|-------------------------------------------------------------------------------------------------------------------------------------------------------------------------------------------------------------------------------------------------------------------------------------------------------------------------------------------------------------------------------------|

|  |  |  |  |  |  |                                                                                                                                                                                                                                                                                                                                                          |                                                                                                                                                                                                                                                                                                                                                                            |                                                                                                                                                                                                                                                                                                                                                                                         |
|--|--|--|--|--|--|----------------------------------------------------------------------------------------------------------------------------------------------------------------------------------------------------------------------------------------------------------------------------------------------------------------------------------------------------------|----------------------------------------------------------------------------------------------------------------------------------------------------------------------------------------------------------------------------------------------------------------------------------------------------------------------------------------------------------------------------|-----------------------------------------------------------------------------------------------------------------------------------------------------------------------------------------------------------------------------------------------------------------------------------------------------------------------------------------------------------------------------------------|
|  |  |  |  |  |  | VPS41<br>VPS8<br>VSTM2A<br>VTA1<br>VTI1A<br>VWCE<br>WAC<br>WASF2<br>WBP11<br>WBSCR16<br>WDFY2<br>WDFY3<br>WDR1<br>WDR13<br>WDR19<br>WDR24<br>WDR26<br>WDR27<br>WDR35<br>WDR37<br>WDR54<br>WDR55<br>WDR6<br>WDR60<br>WDR63<br>WDR66<br>WDR7<br>WDR72<br>WDR75<br>WDR78<br>WDR90<br>WFIKKN2<br>WHSC1<br>WHSC1L1<br>WIBG<br>WIPF1<br>WIPI2<br>WISP1<br>WNK1 | SYNGAP1<br>SYNJ1<br>SYNJ2<br>SYNPO<br>SYNPO2<br>SYNPR<br>SYS1<br>SYT11<br>SYT12<br>SYT13<br>SYT16<br>SYT17<br>SYT4<br>SYT6<br>SYT7<br>SYT8<br>SYTL5<br>TACC1<br>TACSTD2<br>TAF1<br>TAF13<br>TAF15<br>TAF3<br>TAF9B<br>TAGLN<br>TANC1<br>TANC2<br>TARDBP<br>TARS<br>TARSL2<br>TAS2R14<br>TASP1<br>TBC1D1<br>TBC1D14<br>TBC1D15<br>TBC1D20<br>TBC1D22B<br>TBC1D23<br>TBC1D24 | RANBP2<br>RANBP9<br>RANGRF<br>RAP1A<br>RAP1GDS1<br>RAP2A<br>RAP2B<br>RAPGEF2<br>RAPGEF6<br>RAPH1<br>RARS2<br>RASA2<br>RASA3<br>RASAL1<br>RASAL2<br>RASD1<br>RASEF<br>RASGEF1A<br>RASGRP3<br>RASIP1<br>RASL11A<br>RASL11B<br>RASSF4<br>RASSF5<br>RASSF6<br>RASSF8<br>RASSF9<br>RAVER2<br>RBAK<br>RBBP6<br>RBBP9<br>RBM11<br>RBM12B<br>RBM14<br>RBM17<br>RBM18<br>RBM25<br>RBM27<br>RBM41 |
|--|--|--|--|--|--|----------------------------------------------------------------------------------------------------------------------------------------------------------------------------------------------------------------------------------------------------------------------------------------------------------------------------------------------------------|----------------------------------------------------------------------------------------------------------------------------------------------------------------------------------------------------------------------------------------------------------------------------------------------------------------------------------------------------------------------------|-----------------------------------------------------------------------------------------------------------------------------------------------------------------------------------------------------------------------------------------------------------------------------------------------------------------------------------------------------------------------------------------|

|  |  |  |  |  |  |                                                                                                                                                                                                                                                                                                                                                |                                                                                                                                                                                                                                                                                                                                                                     |                                                                                                                                                                                                                                                                                                                                               |
|--|--|--|--|--|--|------------------------------------------------------------------------------------------------------------------------------------------------------------------------------------------------------------------------------------------------------------------------------------------------------------------------------------------------|---------------------------------------------------------------------------------------------------------------------------------------------------------------------------------------------------------------------------------------------------------------------------------------------------------------------------------------------------------------------|-----------------------------------------------------------------------------------------------------------------------------------------------------------------------------------------------------------------------------------------------------------------------------------------------------------------------------------------------|
|  |  |  |  |  |  | WNK2<br>WNK3<br>WNK4<br>WNT2B<br>WNT4<br>WWC2<br>WWC3<br>WVOX<br>XAF1<br>XBP1<br>XG<br>XIAP<br>XKR6<br>XPNPEP1<br>XPNPEP3<br>XPO4<br>XPO5<br>XRCC6BP1<br>XRN1<br>XRN2<br>XYLT1<br>YAP1<br>YARS<br>YIPF5<br>YME1L1<br>YOD1<br>YPEL1<br>YPEL2<br>YPEL5<br>YRDC<br>YTHDC1<br>YTHDF2<br>YWHAG<br>YY1<br>ZBED3<br>ZBED5<br>ZBP1<br>ZBTB37<br>ZBTB38 | TBC1D25<br>TBC1D2B<br>TBC1D7<br>TBC1D8B<br>TBCD<br>TBL1XR1<br>TBRG1<br>TBX3<br>TCEA2<br>TCEA3<br>TCEAL7<br>TCEAL8<br>TCERG1L<br>TCF12<br>TCF19<br>TCF3<br>TCF4<br>TCF7L2<br>TCFL5<br>TCHP<br>TCP10L<br>TCP11L1<br>TCTE3<br>TDRD10<br>TDRD9<br>TEAD1<br>TEAD2<br>TEF<br>TEP1<br>TES<br>TET2<br>TEX11<br>TEX264<br>TFCP2<br>TFCP2L1<br>TFDP1<br>TFRC<br>TGDS<br>TGFB2 | RBM47<br>RBM5<br>RBM8A<br>RBMS1<br>RBMS2<br>RBMS3<br>RBP7<br>RBPJ<br>RBPMS<br>RC3H1<br>RC3H2<br>RCAN3<br>RCBTB1<br>RCC2<br>RCL1<br>RCOR1<br>RCOR3<br>RDH10<br>RDH11<br>REC8<br>REG3A<br>REG3G<br>REG4<br>REL<br>RELL1<br>RELT<br>REPIN1<br>REPS1<br>REPS2<br>RERG<br>REV1<br>REV3L<br>REXO2<br>RFESD<br>RFFL<br>RFT1<br>RFTN2<br>RFX1<br>RFX2 |
|--|--|--|--|--|--|------------------------------------------------------------------------------------------------------------------------------------------------------------------------------------------------------------------------------------------------------------------------------------------------------------------------------------------------|---------------------------------------------------------------------------------------------------------------------------------------------------------------------------------------------------------------------------------------------------------------------------------------------------------------------------------------------------------------------|-----------------------------------------------------------------------------------------------------------------------------------------------------------------------------------------------------------------------------------------------------------------------------------------------------------------------------------------------|

|  |  |  |  |  |                                                                                                                                                                                                                                                                                                                                                                                              |                                                                                                                                                                                                                                                                                                                                                             |                                                                                                                                                                                                                                                                                                                                                       |
|--|--|--|--|--|----------------------------------------------------------------------------------------------------------------------------------------------------------------------------------------------------------------------------------------------------------------------------------------------------------------------------------------------------------------------------------------------|-------------------------------------------------------------------------------------------------------------------------------------------------------------------------------------------------------------------------------------------------------------------------------------------------------------------------------------------------------------|-------------------------------------------------------------------------------------------------------------------------------------------------------------------------------------------------------------------------------------------------------------------------------------------------------------------------------------------------------|
|  |  |  |  |  | ZBTB4<br>ZBTB41<br>ZBTB44<br>ZBTB46<br>ZBTB47<br>ZBTB7A<br>ZC3H12C<br>ZC3H13<br>ZC3H18<br>ZC3H3<br>ZC3H4<br>ZC3H6<br>ZC3H8<br>ZC3HAV1<br>ZC3HAV1L<br>ZCCHC2<br>ZCCHC7<br>ZCCHC8<br>ZCWPW1<br>ZDBF2<br>ZDHHC11<br>ZDHHC14<br>ZDHHC2<br>ZDHHC20<br>ZDHHC24<br>ZEB2<br>ZFAND2A<br>ZFAND2B<br>ZFAND3<br>ZFAND5<br>ZFAND6<br>ZFAT<br>ZFHX2<br>ZFP14<br>ZFP28<br>ZFP64<br>ZFY<br>ZFYVE1<br>ZFYVE27 | TGFBR3<br>TGIF1<br>THAP2<br>THAP5<br>THAP6<br>THBD<br>THEM4<br>THOC2<br>THRAP3<br>THRB<br>THSD4<br>THSD7A<br>TIAL1<br>TIAM2<br>TIFA<br>TIGD4<br>TINAG<br>TIPRL<br>TJP2<br>TLE3<br>TLK1<br>TLK2<br>TLR8<br>TM7SF3<br>TM9SF3<br>TMC5<br>TMCC1<br>TMCC3<br>TMCO2<br>TMCO3<br>TMCO4<br>TMED10<br>TMED2<br>TMED3<br>TMED4<br>TMED5<br>TMED6<br>TMED8<br>TMEM106B | RFX4<br>RFXAP<br>RGL3<br>RGMA<br>RGM<br>RGS12<br>RGS16<br>RGS22<br>RGS5<br>RGS7BP<br>RHBDD2<br>RHBDF1<br>RHEB<br>RHOA<br>RHOB<br>RHOC<br>RHOF<br>RHOJ<br>RHOT1<br>RHOV<br>RHOV<br>RHPN1<br>RHPN2<br>RIBC1<br>RICTOR<br>RILP<br>RIMBP2<br>RIMS2<br>RIMS4<br>RIN2<br>RIOK1<br>RIOK2<br>RIPK3<br>RIPK4<br>RIT1<br>RNASEH1<br>RNASEL<br>RNASET2<br>RNF126 |
|--|--|--|--|--|----------------------------------------------------------------------------------------------------------------------------------------------------------------------------------------------------------------------------------------------------------------------------------------------------------------------------------------------------------------------------------------------|-------------------------------------------------------------------------------------------------------------------------------------------------------------------------------------------------------------------------------------------------------------------------------------------------------------------------------------------------------------|-------------------------------------------------------------------------------------------------------------------------------------------------------------------------------------------------------------------------------------------------------------------------------------------------------------------------------------------------------|

|  |  |  |  |  |         |          |          |
|--|--|--|--|--|---------|----------|----------|
|  |  |  |  |  | ZFYVE28 | TMEM106C | RNF130   |
|  |  |  |  |  | ZHX1    | TMEM107  | RNF135   |
|  |  |  |  |  | ZKSCAN1 | TMEM108  | RNF14    |
|  |  |  |  |  | ZKSCAN2 | TMEM121  | RNF141   |
|  |  |  |  |  | ZMAT1   | TMEM125  | RNF145   |
|  |  |  |  |  | ZMAT2   | TMEM127  | RNF146   |
|  |  |  |  |  | ZMAT3   | TMEM130  | RNF149   |
|  |  |  |  |  | ZMIZ1   | TMEM131  | RNF150   |
|  |  |  |  |  | ZMIZ2   | TMEM132B | RNF157   |
|  |  |  |  |  | ZNF10   | TMEM132D | RNF166   |
|  |  |  |  |  | ZNF12   | TMEM134  | RNF169   |
|  |  |  |  |  | ZNF124  | TMEM139  | RNF180   |
|  |  |  |  |  | ZNF182  | TMEM143  | RNF182   |
|  |  |  |  |  | ZNF2    | TMEM144  | RNF185   |
|  |  |  |  |  | ZNF213  | TMEM154  | RNF19A   |
|  |  |  |  |  | ZNF219  | TMEM173  | RNF212   |
|  |  |  |  |  | ZNF224  | TMEM176B | RNF213   |
|  |  |  |  |  | ZNF225  | TMEM18   | RNF214   |
|  |  |  |  |  | ZNF226  | TMEM181  | RNF215   |
|  |  |  |  |  | ZNF229  | TMEM185A | RNF219   |
|  |  |  |  |  | ZNF233  | TMEM192  | RNF24    |
|  |  |  |  |  | ZNF24   | TMEM196  | RNF38    |
|  |  |  |  |  | ZNF25   | TMEM198  | RNPC3    |
|  |  |  |  |  | ZNF251  | TMEM200A | RNPS1    |
|  |  |  |  |  | ZNF254  | TMEM204  | ROBO2    |
|  |  |  |  |  | ZNF264  | TMEM209  | ROCK1    |
|  |  |  |  |  | ZNF274  | TMEM30A  | ROR1     |
|  |  |  |  |  | ZNF275  | TMEM30B  | RORB     |
|  |  |  |  |  | ZNF280B | TMEM33   | RP9      |
|  |  |  |  |  | ZNF283  | TMEM38B  | RP9P     |
|  |  |  |  |  | ZNF284  | TMEM39A  | RPA1     |
|  |  |  |  |  | ZNF286A | TMEM42   | RPAIN    |
|  |  |  |  |  | ZNF3    | TMEM44   | RPE      |
|  |  |  |  |  | ZNF302  | TMEM54   | RPGRIP1L |
|  |  |  |  |  | ZNF317  | TMEM59   | RPH3AL   |
|  |  |  |  |  | ZNF326  | TMEM60   | RPL10A   |
|  |  |  |  |  | ZNF331  | TMEM61   | RPL14    |
|  |  |  |  |  | ZNF333  | TMEM64   | RPL15    |
|  |  |  |  |  | ZNF346  | TMEM65   | RPL18    |

|  |  |  |  |  |  |         |           |          |
|--|--|--|--|--|--|---------|-----------|----------|
|  |  |  |  |  |  | ZNF350  | TMEM68    | RPL19    |
|  |  |  |  |  |  | ZNF362  | TMEM86B   | RPL22L1  |
|  |  |  |  |  |  | ZNF385D | TMEM9     | RPL24    |
|  |  |  |  |  |  | ZNF418  | TMEM99    | RPL27    |
|  |  |  |  |  |  | ZNF439  | TMOD2     | RPL32P3  |
|  |  |  |  |  |  | ZNF445  | TMPO      | RPL34    |
|  |  |  |  |  |  | ZNF462  | TMPRSS13  | RPL35    |
|  |  |  |  |  |  | ZNF469  | TMPRSS3   | RPL35A   |
|  |  |  |  |  |  | ZNF471  | TMTC1     | RPL36A   |
|  |  |  |  |  |  | ZNF488  | TNFAIP8L3 | RPL37    |
|  |  |  |  |  |  | ZNF490  | TNFRSF10A | RPL6     |
|  |  |  |  |  |  | ZNF493  | TNFRSF10D | RPL7     |
|  |  |  |  |  |  | ZNF496  | TNFRSF11A | RPL9     |
|  |  |  |  |  |  | ZNF497  | TNIP1     | RPP25    |
|  |  |  |  |  |  | ZNF506  | TNPO1     | RPS10    |
|  |  |  |  |  |  | ZNF507  | TNRC18    | RPS14    |
|  |  |  |  |  |  | ZNF511  | TNRC6A    | RPS15A   |
|  |  |  |  |  |  | ZNF518A | TNRC6B    | RPS19    |
|  |  |  |  |  |  | ZNF518B | TNRC6C    | RPS19BP1 |
|  |  |  |  |  |  | ZNF521  | TNS3      | RPS23    |
|  |  |  |  |  |  | ZNF527  | TNS4      | RPS24    |
|  |  |  |  |  |  | ZNF529  | TOB2      | RPS25    |
|  |  |  |  |  |  | ZNF540  | TOLLIP    | RPS27    |
|  |  |  |  |  |  | ZNF543  | TOM1L1    | RPS29    |
|  |  |  |  |  |  | ZNF544  | TOM1L2    | RPS5     |
|  |  |  |  |  |  | ZNF554  | TOR3A     | RPS6     |
|  |  |  |  |  |  | ZNF555  | TOX3      | RPS6KA3  |
|  |  |  |  |  |  | ZNF558  | TOX4      | RPS6KA6  |
|  |  |  |  |  |  | ZNF585A | TP73      | RPS6KB1  |
|  |  |  |  |  |  | ZNF587  | TPBG      | RPS6KL1  |
|  |  |  |  |  |  | ZNF592  | TPD52     | RPS7     |
|  |  |  |  |  |  | ZNF594  | TPK1      | RPUSD1   |
|  |  |  |  |  |  | ZNF596  | TPM1      | RPUSD3   |
|  |  |  |  |  |  | ZNF600  | TPM2      | RPUSD4   |
|  |  |  |  |  |  | ZNF606  | TPM3      | RRAD     |
|  |  |  |  |  |  | ZNF618  | TPMT      | RRBP1    |
|  |  |  |  |  |  | ZNF622  | TPRG1L    | RRM2B    |
|  |  |  |  |  |  | ZNF624  | TRA2A     | RRP1     |
|  |  |  |  |  |  | ZNF628  | TRAF3IP3  | RSAD2    |

|  |  |  |  |  |  |         |          |         |
|--|--|--|--|--|--|---------|----------|---------|
|  |  |  |  |  |  | ZNF639  | TRAF6    | RSBN1   |
|  |  |  |  |  |  | ZNF644  | TRAFD1   | RSPH1   |
|  |  |  |  |  |  | ZNF652  | TRAK1    | RSPH3   |
|  |  |  |  |  |  | ZNF655  | TRAPPC6B | RSP01   |
|  |  |  |  |  |  | ZNF664  | TRERF1   | RSP03   |
|  |  |  |  |  |  | ZNF668  | TRIB1    | RSPRY1  |
|  |  |  |  |  |  | ZNF670  | TRIM11   | RSRC1   |
|  |  |  |  |  |  | ZNF682  | TRIM14   | RSU1    |
|  |  |  |  |  |  | ZNF691  | TRIM2    | RTBDN   |
|  |  |  |  |  |  | ZNF701  | TRIM32   | RTKN2   |
|  |  |  |  |  |  | ZNF703  | TRIM36   | RTN3    |
|  |  |  |  |  |  | ZNF704  | TRIM4    | RTN4RL1 |
|  |  |  |  |  |  | ZNF706  | TRIM47   | RTTN    |
|  |  |  |  |  |  | ZNF708  | TRIM55   | RUFY1   |
|  |  |  |  |  |  | ZNF711  | TRIM62   | RUFY2   |
|  |  |  |  |  |  | ZNF746  | TRIM63   | RUFY3   |
|  |  |  |  |  |  | ZNF75A  | TRIM7    | RUNDC1  |
|  |  |  |  |  |  | ZNF765  | TRIM9    | RUNX1T1 |
|  |  |  |  |  |  | ZNF770  | TRIO     | RWDD2A  |
|  |  |  |  |  |  | ZNF771  | TRIOBP   | RYBP    |
|  |  |  |  |  |  | ZNF776  | TRIP11   | S100A10 |
|  |  |  |  |  |  | ZNF777  | TRMT5    | S100A16 |
|  |  |  |  |  |  | ZNF780B | TRPC4    | S100A6  |
|  |  |  |  |  |  | ZNF786  | TRPM3    | S100PBP |
|  |  |  |  |  |  | ZNF8    | TRPM6    | S1PR2   |
|  |  |  |  |  |  | ZNF81   | TRPM8    | S1PR5   |
|  |  |  |  |  |  | ZNF823  | TRPS1    | SAE1    |
|  |  |  |  |  |  | ZNF829  | TRPV2    | SALL1   |
|  |  |  |  |  |  | ZNF83   | TRUB1    | SALL4   |
|  |  |  |  |  |  | ZNFX1   | TSC22D2  | SAMD1   |
|  |  |  |  |  |  | ZNRD1   | TSEN2    | SAMD12  |
|  |  |  |  |  |  | ZNRF1   | TSEN54   | SAMD13  |
|  |  |  |  |  |  | ZNRF3   | TSGA10   | SAMD3   |
|  |  |  |  |  |  | ZP1     | TSHZ1    | SAMD5   |
|  |  |  |  |  |  | ZRANB1  | TSHZ3    | SAMHD1  |
|  |  |  |  |  |  | ZRANB2  | TSNARE1  | SAMM50  |
|  |  |  |  |  |  | ZRANB3  | TSPAN12  | SAP30BP |
|  |  |  |  |  |  | ZSCAN18 | TSPAN14  | SAR1B   |
|  |  |  |  |  |  | ZSCAN2  | TSPAN2   | SARDH   |



|  |  |  |  |  |                                          |                                                                                                                                                                                                                                                                                                                                                                    |                                                                                                                                                                                                                                                                                                                                                                      |
|--|--|--|--|--|------------------------------------------|--------------------------------------------------------------------------------------------------------------------------------------------------------------------------------------------------------------------------------------------------------------------------------------------------------------------------------------------------------------------|----------------------------------------------------------------------------------------------------------------------------------------------------------------------------------------------------------------------------------------------------------------------------------------------------------------------------------------------------------------------|
|  |  |  |  |  | ZSWIM5<br>ZXDA<br>ZXDC<br>ZYG11B<br>ZZZ3 | TSPAN33<br>TSPAN5<br>TSPYL6<br>TSR1<br>TTC12<br>TTC17<br>TTC23<br>TTC27<br>TTC30B<br>TTC33<br>TTC7B<br>TTC8<br>TTLL2<br>TTLL7<br>TTN<br>TTY13<br>TTYH3<br>TUB<br>TUBB1<br>TUBE1<br>TULP4<br>TUSC5<br>TWF1<br>TWSG1<br>TXNDC11<br>TXNDC15<br>TXNL4B<br>U2AF1<br>UACA<br>UBA5<br>UBE2B<br>UBE2D3<br>UBE2E2<br>UBE2G1<br>UBE2G2<br>UBE2H<br>UBE2J2<br>UBE2K<br>UBE2Q1 | SARM1<br>SART1<br>SART3<br>SASH1<br>SAV1<br>SBF2<br>SCAF1<br>SCAMP2<br>SCAMP4<br>SCAMP5<br>SCAND1<br>SCARB1<br>SCARB2<br>SCARF2<br>SCD5<br>SCFD1<br>SCFD2<br>SCGB3A1<br>SCGB3A2<br>SCN11A<br>SCN2B<br>SCN4B<br>SCN7A<br>SCN8A<br>SCN9A<br>SCNN1G<br>SCO1<br>SCOC<br>SCRG1<br>SCRN2<br>SCRN3<br>SCRT1<br>SCUBE3<br>SCYL2<br>SCYL3<br>SDAD1<br>SDCCAG3<br>SDF4<br>SDHC |
|--|--|--|--|--|------------------------------------------|--------------------------------------------------------------------------------------------------------------------------------------------------------------------------------------------------------------------------------------------------------------------------------------------------------------------------------------------------------------------|----------------------------------------------------------------------------------------------------------------------------------------------------------------------------------------------------------------------------------------------------------------------------------------------------------------------------------------------------------------------|

|  |  |  |  |  |  |  |                                                                                                                                                                                                                                                                                                                                                        |                                                                                                                                                                                                                                                                                                                                                                                                          |
|--|--|--|--|--|--|--|--------------------------------------------------------------------------------------------------------------------------------------------------------------------------------------------------------------------------------------------------------------------------------------------------------------------------------------------------------|----------------------------------------------------------------------------------------------------------------------------------------------------------------------------------------------------------------------------------------------------------------------------------------------------------------------------------------------------------------------------------------------------------|
|  |  |  |  |  |  |  | UBE2W<br>UBE3C<br>UBE4B<br>UBFD1<br>UBQLN1<br>UBQLN2<br>UBR1<br>UBR3<br>UBR4<br>UBTD2<br>UBTF<br>UCA1<br>UEVLD<br>UGCG<br>UGT1A6<br>UGT8<br>UHMK1<br>UHRF2<br>ULK3<br>ULK4<br>UNC119B<br>UNC13A<br>UNC5B<br>UNC5C<br>UNC5CL<br>UNC5D<br>UNK<br>UPRT<br>USHBP1<br>USMG5<br>USP13<br>USP14<br>USP16<br>USP2<br>USP21<br>USP22<br>USP24<br>USP30<br>USP31 | SDK1<br>SEC11C<br>SEC14L1<br>SEC14L2<br>SEC14L4<br>SEC16B<br>SEC22A<br>SEC22C<br>SEC24A<br>SEC61A2<br>SEC61B<br>SEC62<br>SEC63<br>SECISBP2<br>SEH1L<br>SEMA3A<br>SEMA4D<br>SEMA4F<br>SEMA5A<br>SEMA6A<br>SEMA6D<br>SENP1<br>SENP2<br>SENP7<br>SENP8<br>SEPN1<br>SEPP1<br>SEPSECS<br>SERINC2<br>SERP2<br>SERPINA1<br>SERPINB1<br>SERPINB6<br>SERPINB9<br>SERPINE2<br>SERTAD1<br>SERTAD4<br>SESN2<br>SESN3 |
|--|--|--|--|--|--|--|--------------------------------------------------------------------------------------------------------------------------------------------------------------------------------------------------------------------------------------------------------------------------------------------------------------------------------------------------------|----------------------------------------------------------------------------------------------------------------------------------------------------------------------------------------------------------------------------------------------------------------------------------------------------------------------------------------------------------------------------------------------------------|

|  |  |  |  |  |  |  |                                                                                                                                                                                                                                                                                                                                                               |                                                                                                                                                                                                                                                                                                                                                                          |
|--|--|--|--|--|--|--|---------------------------------------------------------------------------------------------------------------------------------------------------------------------------------------------------------------------------------------------------------------------------------------------------------------------------------------------------------------|--------------------------------------------------------------------------------------------------------------------------------------------------------------------------------------------------------------------------------------------------------------------------------------------------------------------------------------------------------------------------|
|  |  |  |  |  |  |  | USP32<br>USP34<br>USP35<br>USP47<br>USP48<br>USP7<br>UTP11L<br>UTRN<br>VANGL1<br>VARS2<br>VASH1<br>VAV2<br>VAV3<br>VCPIP1<br>VEPH1<br>VGLL2<br>VGLL3<br>VIL1<br>VPS13A<br>VPS13B<br>VPS13C<br>VPS18<br>VPS26B<br>VPS29<br>VPS33A<br>VPS37A<br>VPS41<br>VSIG2<br>VSTM2A<br>VSX1<br>VTA1<br>VTI1A<br>VTI1B<br>VWCE<br>WAC<br>WASF2<br>WBSCR16<br>WDFY2<br>WDFY3 | SETBP1<br>SETD4<br>SETD5<br>SETD7<br>SETD8<br>SETDB2<br>SETX<br>SEZ6L<br>SEZ6L2<br>SF3A1<br>SFMBT2<br>SFPQ<br>SFRP1<br>SFRP2<br>SFT2D1<br>SFXN1<br>SFXN4<br>SFXN5<br>SGCB<br>SGCD<br>SGIP1<br>SGK2<br>SGOL1<br>SGOL2<br>SGPP2<br>SGSM1<br>SGTB<br>SH2D5<br>SH3BGRL2<br>SH3BP4<br>SH3GLB2<br>SH3KBP1<br>SH3PXD2A<br>SH3PXD2B<br>SH3RF1<br>SHANK2<br>SHC4<br>SHF<br>SHISA2 |
|--|--|--|--|--|--|--|---------------------------------------------------------------------------------------------------------------------------------------------------------------------------------------------------------------------------------------------------------------------------------------------------------------------------------------------------------------|--------------------------------------------------------------------------------------------------------------------------------------------------------------------------------------------------------------------------------------------------------------------------------------------------------------------------------------------------------------------------|

|  |  |  |  |  |  |  |                                                                                                                                                                                                                                                                                                                                                    |                                                                                                                                                                                                                                                                                                                                                                                                        |
|--|--|--|--|--|--|--|----------------------------------------------------------------------------------------------------------------------------------------------------------------------------------------------------------------------------------------------------------------------------------------------------------------------------------------------------|--------------------------------------------------------------------------------------------------------------------------------------------------------------------------------------------------------------------------------------------------------------------------------------------------------------------------------------------------------------------------------------------------------|
|  |  |  |  |  |  |  | WDR1<br>WDR20<br>WDR35<br>WDR36<br>WDR37<br>WDR41<br>WDR44<br>WDR55<br>WDR6<br>WDR63<br>WDR66<br>WDR7<br>WDR72<br>WDR74<br>WDR89<br>WDR91<br>WFDC10A<br>WFIKKN2<br>WHSC1<br>WHSC1L1<br>WIBG<br>WIPF1<br>WIPF2<br>WISP1<br>WNK1<br>WNK2<br>WNK3<br>WNK4<br>WNT10A<br>WNT4<br>WNT7B<br>WNT9A<br>WTAP<br>WWC1<br>WWC2<br>WWC3<br>WWOX<br>XAF1<br>XBP1 | SHISA5<br>SHMT1<br>SHPRH<br>SHROOM3<br>SIAE<br>SIN3A<br>SIPA1L1<br>SIPA1L2<br>SIPA1L3<br>SIRPG<br>SIRT5<br>SIRT6<br>SIX3<br>SIX4<br>SKAP2<br>SKI<br>SKIL<br>SLAIN1<br>SLAIN2<br>SLAMF7<br>SLC10A4<br>SLC10A7<br>SLC11A1<br>SLC11A2<br>SLC12A2<br>SLC12A3<br>SLC12A4<br>SLC12A6<br>SLC12A9<br>SLC13A2<br>SLC14A1<br>SLC15A4<br>SLC16A10<br>SLC16A6<br>SLC16A7<br>SLC16A9<br>SLC17A5<br>SLC1A2<br>SLC1A4 |
|--|--|--|--|--|--|--|----------------------------------------------------------------------------------------------------------------------------------------------------------------------------------------------------------------------------------------------------------------------------------------------------------------------------------------------------|--------------------------------------------------------------------------------------------------------------------------------------------------------------------------------------------------------------------------------------------------------------------------------------------------------------------------------------------------------------------------------------------------------|

|  |  |  |  |  |  |  |                                                                                                                                                                                                                                                                                                                                                              |                                                                                                                                                                                                                                                                                                                                                                                                                                                             |
|--|--|--|--|--|--|--|--------------------------------------------------------------------------------------------------------------------------------------------------------------------------------------------------------------------------------------------------------------------------------------------------------------------------------------------------------------|-------------------------------------------------------------------------------------------------------------------------------------------------------------------------------------------------------------------------------------------------------------------------------------------------------------------------------------------------------------------------------------------------------------------------------------------------------------|
|  |  |  |  |  |  |  | XDH<br>XG<br>XKR4<br>XKR6<br>XPNPEP1<br>XPNPEP3<br>XPO4<br>XPOT<br>XPR1<br>XRCC6BP1<br>XRN1<br>XRN2<br>XYLT1<br>YAP1<br>YIPF4<br>YIPF5<br>YPEL1<br>YPEL2<br>YPEL3<br>YRDC<br>YWHAG<br>YWHAH<br>YY1<br>ZBED3<br>ZBED5<br>ZBP1<br>ZBTB11<br>ZBTB2<br>ZBTB37<br>ZBTB38<br>ZBTB4<br>ZBTB41<br>ZBTB43<br>ZBTB46<br>ZBTB7A<br>ZBTB7B<br>ZBTB9<br>ZC3H12C<br>ZC3H13 | SLC20A1<br>SLC22A15<br>SLC22A23<br>SLC22A5<br>SLC23A3<br>SLC25A15<br>SLC25A2<br>SLC25A23<br>SLC25A25<br>SLC25A26<br>SLC25A27<br>SLC25A28<br>SLC25A29<br>SLC25A33<br>SLC25A35<br>SLC25A36<br>SLC25A37<br>SLC25A39<br>SLC25A40<br>SLC25A42<br>SLC25A45<br>SLC25A46<br>SLC26A11<br>SLC26A8<br>SLC26A9<br>SLC27A1<br>SLC28A3<br>SLC2A11<br>SLC2A12<br>SLC2A13<br>SLC2A4RG<br>SLC2A5<br>SLC2A8<br>SLC30A2<br>SLC30A4<br>SLC30A5<br>SLC30A8<br>SLC30A9<br>SLC31A1 |
|--|--|--|--|--|--|--|--------------------------------------------------------------------------------------------------------------------------------------------------------------------------------------------------------------------------------------------------------------------------------------------------------------------------------------------------------------|-------------------------------------------------------------------------------------------------------------------------------------------------------------------------------------------------------------------------------------------------------------------------------------------------------------------------------------------------------------------------------------------------------------------------------------------------------------|











|  |  |  |  |  |  |  |                                                                                    |                                                                                                                                                                                                                                                                                                                                                                              |
|--|--|--|--|--|--|--|------------------------------------------------------------------------------------|------------------------------------------------------------------------------------------------------------------------------------------------------------------------------------------------------------------------------------------------------------------------------------------------------------------------------------------------------------------------------|
|  |  |  |  |  |  |  | ZSCAN18<br>ZSCAN2<br>ZSWIM1<br>ZSWIM5<br>ZUFSP<br>ZWILCH<br>ZXDA<br>ZYG11B<br>ZZZ3 | SPTAN1<br>SPTBN1<br>SPTBN4<br>SPTLC2<br>SPTLC3<br>SRA1<br>SRD5A2<br>SRD5A3<br>SREBF2<br>SRGAP1<br>SRMS<br>SRP68<br>SRPK2<br>SRPRB<br>SRRD<br>SRXN1<br>SSBP2<br>SSFA2<br>SSPN<br>SSR1<br>SSR3<br>SSTR1<br>SSTR2<br>SSU72<br>ST3GAL1<br>ST3GAL2<br>ST3GAL3<br>ST6GAL2<br>ST6GALNAC<br>3<br>ST6GALNAC<br>5<br>ST6GALNAC<br>6<br>ST8SIA2<br>ST8SIA3<br>ST8SIA4<br>STAC2<br>STAG1 |
|--|--|--|--|--|--|--|------------------------------------------------------------------------------------|------------------------------------------------------------------------------------------------------------------------------------------------------------------------------------------------------------------------------------------------------------------------------------------------------------------------------------------------------------------------------|

|  |  |  |  |  |  |  |  |                                                                                                                                                                                                                                                                                                                                                                                |
|--|--|--|--|--|--|--|--|--------------------------------------------------------------------------------------------------------------------------------------------------------------------------------------------------------------------------------------------------------------------------------------------------------------------------------------------------------------------------------|
|  |  |  |  |  |  |  |  | STAMPB<br>STAMBPL1<br>STARD13<br>STARD3NL<br>STARD4<br>STARD7<br>STARD9<br>STAT3<br>STAU2<br>STEAP2<br>STEAP4<br>STIM2<br>STK11<br>STK11IP<br>STK17B<br>STK19<br>STK31<br>STK33<br>STK35<br>STK4<br>STK40<br>STMN3<br>STON1<br>STON2<br>STRBP<br>STRN<br>STT3B<br>STUB1<br>STX3<br>STX4<br>STX6<br>STXBP5<br>STXBP5L<br>STXBP6<br>STYXL1<br>SUCLG1<br>SUFU<br>SULF2<br>SULT1C2 |
|--|--|--|--|--|--|--|--|--------------------------------------------------------------------------------------------------------------------------------------------------------------------------------------------------------------------------------------------------------------------------------------------------------------------------------------------------------------------------------|

|  |  |  |  |  |  |  |  |                                                                                                                                                                                                                                                                                                                                                               |
|--|--|--|--|--|--|--|--|---------------------------------------------------------------------------------------------------------------------------------------------------------------------------------------------------------------------------------------------------------------------------------------------------------------------------------------------------------------|
|  |  |  |  |  |  |  |  | SUPT16H<br>SURF4<br>SURF6<br>SUSD1<br>SUSD4<br>SUV420H2<br>SV2B<br>SVEP1<br>SVIP<br>SVOP<br>SYCE1<br>SYCP2<br>SYCP3<br>SYK<br>SYNCRIP<br>SYNE1<br>SYNE2<br>SYNGAP1<br>SYNGR2<br>SYNJ1<br>SYNJ2<br>SYNPO<br>SYNPO2<br>SYNPR<br>SYS1<br>SYT11<br>SYT12<br>SYT13<br>SYT16<br>SYT17<br>SYT4<br>SYT6<br>SYT7<br>SYT8<br>SYTL5<br>TACC1<br>TACSTD2<br>TAF1<br>TAF13 |
|--|--|--|--|--|--|--|--|---------------------------------------------------------------------------------------------------------------------------------------------------------------------------------------------------------------------------------------------------------------------------------------------------------------------------------------------------------------|

|  |  |  |  |  |  |  |  |                                                                                                                                                                                                                                                                                                                                                                                        |
|--|--|--|--|--|--|--|--|----------------------------------------------------------------------------------------------------------------------------------------------------------------------------------------------------------------------------------------------------------------------------------------------------------------------------------------------------------------------------------------|
|  |  |  |  |  |  |  |  | TAF15<br>TAF3<br>TAF4B<br>TAF9B<br>TAGLN<br>TANC1<br>TANC2<br>TAP2<br>TAPT1<br>TARDBP<br>TARS<br>TARSL2<br>TAS2R14<br>TAS2R5<br>TASP1<br>TATDN1<br>TBC1D1<br>TBC1D14<br>TBC1D15<br>TBC1D20<br>TBC1D22B<br>TBC1D23<br>TBC1D24<br>TBC1D25<br>TBC1D2B<br>TBC1D7<br>TBC1D8B<br>TBCD<br>TBL1XR1<br>TBRG1<br>TBX15<br>TBX3<br>TC2N<br>TCEA2<br>TCEA3<br>TCEAL7<br>TCEAL8<br>TCERG1L<br>TCF12 |
|--|--|--|--|--|--|--|--|----------------------------------------------------------------------------------------------------------------------------------------------------------------------------------------------------------------------------------------------------------------------------------------------------------------------------------------------------------------------------------------|

|  |  |  |  |  |  |  |  |                                                                                                                                                                                                                                                                                                                                                           |
|--|--|--|--|--|--|--|--|-----------------------------------------------------------------------------------------------------------------------------------------------------------------------------------------------------------------------------------------------------------------------------------------------------------------------------------------------------------|
|  |  |  |  |  |  |  |  | TCF19<br>TCF3<br>TCF4<br>TCF7L2<br>TCFL5<br>TCHP<br>TCOF1<br>TCP10L<br>TCP11L1<br>TCTE3<br>TCTEX1D2<br>TCTN2<br>TDRD10<br>TDRD9<br>TEAD1<br>TEAD2<br>TEF<br>TEP1<br>TES<br>TESC<br>TET1<br>TET2<br>TEX11<br>TEX264<br>TFB1M<br>TFCP2<br>TFCP2L1<br>TFDP1<br>TFG<br>TFRC<br>TGDS<br>TGFB2<br>TGFB3<br>TGFBRAP1<br>TGIF1<br>THAP2<br>THAP5<br>THAP6<br>THBD |
|--|--|--|--|--|--|--|--|-----------------------------------------------------------------------------------------------------------------------------------------------------------------------------------------------------------------------------------------------------------------------------------------------------------------------------------------------------------|

|  |  |  |  |  |  |  |  |                                                                                                                                                                                                                                                                                                                                                       |
|--|--|--|--|--|--|--|--|-------------------------------------------------------------------------------------------------------------------------------------------------------------------------------------------------------------------------------------------------------------------------------------------------------------------------------------------------------|
|  |  |  |  |  |  |  |  | THEM4<br>THNSL1<br>THOC2<br>THRAP3<br>THRB<br>THSD4<br>THSD7A<br>TIAL1<br>TIAM2<br>TIFA<br>TIGD4<br>TIGD7<br>TIMP2<br>TINAG<br>TIPRL<br>TJP2<br>TK2<br>TKT<br>TLE3<br>TLK1<br>TLK2<br>TLN2<br>TLR3<br>TLR8<br>TM4SF18<br>TM7SF3<br>TM9SF3<br>TMBIM4<br>TMC5<br>TMC8<br>TMCC1<br>TMCC3<br>TMC02<br>TMC03<br>TMC04<br>TMED10<br>TMED2<br>TMED3<br>TMED4 |
|--|--|--|--|--|--|--|--|-------------------------------------------------------------------------------------------------------------------------------------------------------------------------------------------------------------------------------------------------------------------------------------------------------------------------------------------------------|

|  |  |  |  |  |  |  |  |                                                                                                                                                                                                                                                                                                                                                                                                                                          |
|--|--|--|--|--|--|--|--|------------------------------------------------------------------------------------------------------------------------------------------------------------------------------------------------------------------------------------------------------------------------------------------------------------------------------------------------------------------------------------------------------------------------------------------|
|  |  |  |  |  |  |  |  | TMED5<br>TMED6<br>TMED8<br>TMEM101<br>TMEM102<br>TMEM106B<br>TMEM106C<br>TMEM107<br>TMEM108<br>TMEM121<br>TMEM125<br>TMEM127<br>TMEM130<br>TMEM131<br>TMEM132A<br>TMEM132B<br>TMEM132D<br>TMEM134<br>TMEM138<br>TMEM139<br>TMEM143<br>TMEM144<br>TMEM154<br>TMEM163<br>TMEM171<br>TMEM173<br>TMEM176B<br>TMEM18<br>TMEM181<br>TMEM185A<br>TMEM192<br>TMEM196<br>TMEM198<br>TMEM200A<br>TMEM204<br>TMEM209<br>TMEM25<br>TMEM27<br>TMEM30A |
|--|--|--|--|--|--|--|--|------------------------------------------------------------------------------------------------------------------------------------------------------------------------------------------------------------------------------------------------------------------------------------------------------------------------------------------------------------------------------------------------------------------------------------------|



|  |  |  |  |  |  |  |  |                                                                                                                                                                                                                                                                                                                                                                                                                         |
|--|--|--|--|--|--|--|--|-------------------------------------------------------------------------------------------------------------------------------------------------------------------------------------------------------------------------------------------------------------------------------------------------------------------------------------------------------------------------------------------------------------------------|
|  |  |  |  |  |  |  |  | TMEM30B<br>TMEM33<br>TMEM38A<br>TMEM38B<br>TMEM39A<br>TMEM42<br>TMEM44<br>TMEM52<br>TMEM54<br>TMEM55A<br>TMEM55B<br>TMEM57<br>TMEM59<br>TMEM60<br>TMEM61<br>TMEM64<br>TMEM65<br>TMEM68<br>TMEM69<br>TMEM86B<br>TMEM9<br>TMEM92<br>TMEM98<br>TMEM99<br>TMEM9B<br>TMLHE<br>TMOD2<br>TMPO<br>TMPRSS13<br>TMPRSS3<br>TMPRSS6<br>TMTC1<br>TNFAIP8<br>TNFAIP8L3<br>TNFRSF10A<br>TNFRSF10D<br>TNFRSF11A<br>TNFRSF19<br>TNFSF14 |
|--|--|--|--|--|--|--|--|-------------------------------------------------------------------------------------------------------------------------------------------------------------------------------------------------------------------------------------------------------------------------------------------------------------------------------------------------------------------------------------------------------------------------|

|  |  |  |  |  |  |  |  |                                                                                                                                                                                                                                                                                                                                                                           |
|--|--|--|--|--|--|--|--|---------------------------------------------------------------------------------------------------------------------------------------------------------------------------------------------------------------------------------------------------------------------------------------------------------------------------------------------------------------------------|
|  |  |  |  |  |  |  |  | TNIK<br>TNIP1<br>TNKS1BP1<br>TNPO1<br>TNRC18<br>TNRC6A<br>TNRC6B<br>TNRC6C<br>TNS3<br>TNS4<br>TOB2<br>TOLLIP<br>TOM1L1<br>TOM1L2<br>TOMM22<br>TOMM40L<br>TOP1MT<br>TOR3A<br>TOX2<br>TOX3<br>TOX4<br>TP53INP1<br>TP53INP2<br>TP73<br>TPBG<br>TPD52<br>TPK1<br>TPM1<br>TPM2<br>TPM3<br>TPMT<br>TPRG1L<br>TRA2A<br>TRAF1<br>TRAF3IP1<br>TRAF3IP3<br>TRAF6<br>TRAFD1<br>TRAK1 |
|--|--|--|--|--|--|--|--|---------------------------------------------------------------------------------------------------------------------------------------------------------------------------------------------------------------------------------------------------------------------------------------------------------------------------------------------------------------------------|

|  |  |  |  |  |  |  |  |                                                                                                                                                                                                                                                                                                                                                                                  |
|--|--|--|--|--|--|--|--|----------------------------------------------------------------------------------------------------------------------------------------------------------------------------------------------------------------------------------------------------------------------------------------------------------------------------------------------------------------------------------|
|  |  |  |  |  |  |  |  | TRAM1L1<br>TRAPPC6B<br>TRERF1<br>TRIB1<br>TRIM11<br>TRIM14<br>TRIM2<br>TRIM32<br>TRIM36<br>TRIM4<br>TRIM47<br>TRIM5<br>TRIM50<br>TRIM55<br>TRIM6<br>TRIM62<br>TRIM63<br>TRIM7<br>TRIM8<br>TRIM9<br>TRIO<br>TRIOBP<br>TRIP11<br>TRIP12<br>TRMT5<br>TRPC4<br>TRPM3<br>TRPM6<br>TRPM8<br>TRPS1<br>TRPV2<br>TRUB1<br>TSC22D2<br>TSEN2<br>TSEN54<br>TSGA10<br>TSHZ1<br>TSHZ2<br>TSHZ3 |
|--|--|--|--|--|--|--|--|----------------------------------------------------------------------------------------------------------------------------------------------------------------------------------------------------------------------------------------------------------------------------------------------------------------------------------------------------------------------------------|

|  |  |  |  |  |  |  |  |                                                                                                                                                                                                                                                                                                                                                                 |
|--|--|--|--|--|--|--|--|-----------------------------------------------------------------------------------------------------------------------------------------------------------------------------------------------------------------------------------------------------------------------------------------------------------------------------------------------------------------|
|  |  |  |  |  |  |  |  | TSNARE1<br>TSPAN12<br>TSPAN14<br>TSPAN2<br>TSPAN3<br>TSPAN33<br>TSPAN5<br>TSPYL6<br>TSR1<br>TTBK2<br>TTC12<br>TTC17<br>TTC23<br>TTC26<br>TTC27<br>TTC30B<br>TTC33<br>TTC5<br>TTC7A<br>TTC7B<br>TTC8<br>TTC9C<br>TTLL11<br>TTLL2<br>TTLL7<br>TTN<br>TTY13<br>TTYH2<br>TTYH3<br>TUB<br>TUBB1<br>TUBE1<br>TUFM<br>TUG1<br>TULP4<br>TUSC1<br>TUSC3<br>TUSC5<br>TWF1 |
|--|--|--|--|--|--|--|--|-----------------------------------------------------------------------------------------------------------------------------------------------------------------------------------------------------------------------------------------------------------------------------------------------------------------------------------------------------------------|

|  |  |  |  |  |  |  |  |                                                                                                                                                                                                                                                                                                                                                                          |
|--|--|--|--|--|--|--|--|--------------------------------------------------------------------------------------------------------------------------------------------------------------------------------------------------------------------------------------------------------------------------------------------------------------------------------------------------------------------------|
|  |  |  |  |  |  |  |  | TWISTNB<br>TWSG1<br>TXNDC11<br>TXNDC12<br>TXNDC15<br>TXNL4B<br>U2AF1<br>UACA<br>UBA5<br>UBAC2<br>UBASH3B<br>UBE2B<br>UBE2D3<br>UBE2E2<br>UBE2G1<br>UBE2G2<br>UBE2H<br>UBE2J2<br>UBE2K<br>UBE2Q1<br>UBE2Q2<br>UBE2T<br>UBE2W<br>UBE2Z<br>UBE3C<br>UBE4B<br>UBFD1<br>UBQLN1<br>UBQLN2<br>UBR1<br>UBR3<br>UBR4<br>UBTD2<br>UBTF<br>UCA1<br>UCKL1<br>UEVLD<br>UGCG<br>UGT1A6 |
|--|--|--|--|--|--|--|--|--------------------------------------------------------------------------------------------------------------------------------------------------------------------------------------------------------------------------------------------------------------------------------------------------------------------------------------------------------------------------|

|  |  |  |  |  |  |  |  |                                                                                                                                                                                                                                                                                                                                                          |
|--|--|--|--|--|--|--|--|----------------------------------------------------------------------------------------------------------------------------------------------------------------------------------------------------------------------------------------------------------------------------------------------------------------------------------------------------------|
|  |  |  |  |  |  |  |  | UGT8<br>UHMK1<br>UHRF2<br>ULK3<br>ULK4<br>UNC119B<br>UNC13A<br>UNC45B<br>UNC5B<br>UNC5C<br>UNC5CL<br>UNC5D<br>UNK<br>UPRT<br>URM1<br>USHBP1<br>USMG5<br>USP13<br>USP14<br>USP16<br>USP2<br>USP21<br>USP22<br>USP24<br>USP3<br>USP30<br>USP31<br>USP32<br>USP34<br>USP35<br>USP37<br>USP38<br>USP40<br>USP47<br>USP48<br>USP7<br>USP9Y<br>UTP11L<br>UTP15 |
|--|--|--|--|--|--|--|--|----------------------------------------------------------------------------------------------------------------------------------------------------------------------------------------------------------------------------------------------------------------------------------------------------------------------------------------------------------|

|  |  |  |  |  |  |  |  |                                                                                                                                                                                                                                                                                                                                                          |
|--|--|--|--|--|--|--|--|----------------------------------------------------------------------------------------------------------------------------------------------------------------------------------------------------------------------------------------------------------------------------------------------------------------------------------------------------------|
|  |  |  |  |  |  |  |  | UTP6<br>UTRN<br>UXS1<br>VANGL1<br>VAPA<br>VARS2<br>VASH1<br>VASN<br>VAV2<br>VAV3<br>VCPIP1<br>VEPH1<br>VGLL2<br>VGLL3<br>VIL1<br>VPS13A<br>VPS13B<br>VPS13C<br>VPS18<br>VPS26B<br>VPS29<br>VPS33A<br>VPS35<br>VPS37A<br>VPS41<br>VPS8<br>VSIG2<br>VSTM2A<br>VSX1<br>VTA1<br>VTI1A<br>VTI1B<br>VWCE<br>WAC<br>WASF2<br>WBP11<br>WBSCR16<br>WDFY2<br>WDFY3 |
|--|--|--|--|--|--|--|--|----------------------------------------------------------------------------------------------------------------------------------------------------------------------------------------------------------------------------------------------------------------------------------------------------------------------------------------------------------|

|  |  |  |  |  |  |  |  |                                                                                                                                                                                                                                                                                                                                                           |
|--|--|--|--|--|--|--|--|-----------------------------------------------------------------------------------------------------------------------------------------------------------------------------------------------------------------------------------------------------------------------------------------------------------------------------------------------------------|
|  |  |  |  |  |  |  |  | WDR1<br>WDR13<br>WDR19<br>WDR20<br>WDR24<br>WDR26<br>WDR27<br>WDR35<br>WDR36<br>WDR37<br>WDR41<br>WDR44<br>WDR54<br>WDR55<br>WDR6<br>WDR60<br>WDR63<br>WDR66<br>WDR7<br>WDR72<br>WDR74<br>WDR75<br>WDR78<br>WDR89<br>WDR90<br>WDR91<br>WFDC10A<br>WFIKKN2<br>WHSC1<br>WHSC1L1<br>WIBG<br>WIPF1<br>WIPF2<br>WIP12<br>WISP1<br>WNK1<br>WNK2<br>WNK3<br>WNK4 |
|--|--|--|--|--|--|--|--|-----------------------------------------------------------------------------------------------------------------------------------------------------------------------------------------------------------------------------------------------------------------------------------------------------------------------------------------------------------|



|  |  |  |  |  |  |  |  |                                                                                                                                                                                                                                                                                                                                             |
|--|--|--|--|--|--|--|--|---------------------------------------------------------------------------------------------------------------------------------------------------------------------------------------------------------------------------------------------------------------------------------------------------------------------------------------------|
|  |  |  |  |  |  |  |  | WNT10A<br>WNT2B<br>WNT4<br>WNT7B<br>WNT9A<br>WTAP<br>WWC1<br>WWC2<br>WWC3<br>WWOX<br>XAF1<br>XBP1<br>XDH<br>XG<br>XIAP<br>XKR4<br>XKR6<br>XPNPEP1<br>XPNPEP3<br>XPO4<br>XPO5<br>XPOT<br>XPR1<br>XRCC6BP1<br>XRN1<br>XRN2<br>XYLT1<br>YAP1<br>YARS<br>YIPF4<br>YIPF5<br>YME1L1<br>YOD1<br>YPEL1<br>YPEL2<br>YPEL3<br>YPEL5<br>YRDC<br>YTHDC1 |
|--|--|--|--|--|--|--|--|---------------------------------------------------------------------------------------------------------------------------------------------------------------------------------------------------------------------------------------------------------------------------------------------------------------------------------------------|

|  |  |  |  |  |  |  |  |                                                                                                                                                                                                                                                                                                                                                                                         |
|--|--|--|--|--|--|--|--|-----------------------------------------------------------------------------------------------------------------------------------------------------------------------------------------------------------------------------------------------------------------------------------------------------------------------------------------------------------------------------------------|
|  |  |  |  |  |  |  |  | YTHDF2<br>YWHAG<br>YWHAH<br>YY1<br>ZBED3<br>ZBED5<br>ZBP1<br>ZBTB11<br>ZBTB2<br>ZBTB37<br>ZBTB38<br>ZBTB4<br>ZBTB41<br>ZBTB43<br>ZBTB44<br>ZBTB46<br>ZBTB47<br>ZBTB7A<br>ZBTB7B<br>ZBTB9<br>ZC3H12C<br>ZC3H13<br>ZC3H14<br>ZC3H18<br>ZC3H3<br>ZC3H4<br>ZC3H6<br>ZC3H8<br>ZC3HAV1<br>ZC3HAV1L<br>ZC3HC1<br>ZCCHC17<br>ZCCHC2<br>ZCCHC6<br>ZCCHC7<br>ZCCHC8<br>ZCWPW1<br>ZDBF2<br>ZDHHC11 |
|--|--|--|--|--|--|--|--|-----------------------------------------------------------------------------------------------------------------------------------------------------------------------------------------------------------------------------------------------------------------------------------------------------------------------------------------------------------------------------------------|

|  |  |  |  |  |  |  |  |                                                                                                                                                                                                                                                                                                                                                                                      |
|--|--|--|--|--|--|--|--|--------------------------------------------------------------------------------------------------------------------------------------------------------------------------------------------------------------------------------------------------------------------------------------------------------------------------------------------------------------------------------------|
|  |  |  |  |  |  |  |  | ZDHHC13<br>ZDHHC14<br>ZDHHC2<br>ZDHHC20<br>ZDHHC21<br>ZDHHC23<br>ZDHHC24<br>ZDHHC5<br>ZDHHC9<br>ZEB2<br>ZFAND2A<br>ZFAND2B<br>ZFAND3<br>ZFAND5<br>ZFAND6<br>ZFAT<br>ZFHX2<br>ZFP14<br>ZFP28<br>ZFP64<br>ZFP90<br>ZFX<br>ZFY<br>ZFYVE1<br>ZFYVE16<br>ZFYVE27<br>ZFYVE28<br>ZHX1<br>ZIC4<br>ZKSCAN1<br>ZKSCAN2<br>ZMAT1<br>ZMAT2<br>ZMAT3<br>ZMIZ1<br>ZMIZ2<br>ZMYM2<br>ZMYM6<br>ZNF10 |
|--|--|--|--|--|--|--|--|--------------------------------------------------------------------------------------------------------------------------------------------------------------------------------------------------------------------------------------------------------------------------------------------------------------------------------------------------------------------------------------|

|  |  |  |  |  |  |  |  |                                                                                                                                                                                                                                                                                                                                                                                             |
|--|--|--|--|--|--|--|--|---------------------------------------------------------------------------------------------------------------------------------------------------------------------------------------------------------------------------------------------------------------------------------------------------------------------------------------------------------------------------------------------|
|  |  |  |  |  |  |  |  | ZNF12<br>ZNF124<br>ZNF146<br>ZNF148<br>ZNF160<br>ZNF175<br>ZNF18<br>ZNF180<br>ZNF182<br>ZNF197<br>ZNF2<br>ZNF207<br>ZNF213<br>ZNF219<br>ZNF224<br>ZNF225<br>ZNF226<br>ZNF229<br>ZNF233<br>ZNF24<br>ZNF25<br>ZNF251<br>ZNF253<br>ZNF254<br>ZNF264<br>ZNF268<br>ZNF274<br>ZNF275<br>ZNF276<br>ZNF280B<br>ZNF283<br>ZNF284<br>ZNF286A<br>ZNF3<br>ZNF30<br>ZNF300<br>ZNF302<br>ZNF317<br>ZNF326 |
|--|--|--|--|--|--|--|--|---------------------------------------------------------------------------------------------------------------------------------------------------------------------------------------------------------------------------------------------------------------------------------------------------------------------------------------------------------------------------------------------|



|  |  |  |  |  |  |  |  |                                                                                                                                                                                                                                                                                                                                                                                                   |
|--|--|--|--|--|--|--|--|---------------------------------------------------------------------------------------------------------------------------------------------------------------------------------------------------------------------------------------------------------------------------------------------------------------------------------------------------------------------------------------------------|
|  |  |  |  |  |  |  |  | ZNF540<br>ZNF543<br>ZNF544<br>ZNF551<br>ZNF554<br>ZNF555<br>ZNF557<br>ZNF558<br>ZNF566<br>ZNF585A<br>ZNF587<br>ZNF592<br>ZNF594<br>ZNF596<br>ZNF597<br>ZNF598<br>ZNF600<br>ZNF605<br>ZNF606<br>ZNF618<br>ZNF622<br>ZNF624<br>ZNF628<br>ZNF639<br>ZNF641<br>ZNF644<br>ZNF649<br>ZNF652<br>ZNF653<br>ZNF655<br>ZNF664<br>ZNF668<br>ZNF670<br>ZNF681<br>ZNF682<br>ZNF684<br>ZNF688<br>ZNF691<br>ZNF7 |
|--|--|--|--|--|--|--|--|---------------------------------------------------------------------------------------------------------------------------------------------------------------------------------------------------------------------------------------------------------------------------------------------------------------------------------------------------------------------------------------------------|



|  |  |  |  |  |  |  |  |                                                   |
|--|--|--|--|--|--|--|--|---------------------------------------------------|
|  |  |  |  |  |  |  |  | ZUFSP<br>ZWILCH<br>ZXDA<br>ZXDC<br>ZYG11B<br>ZZZ3 |
|--|--|--|--|--|--|--|--|---------------------------------------------------|
